# Supplementary material for: Non-methane hydrocarbon (NMHC) fingerprints of major urban and agricultural emission sources for use in source apportionment studies
Source: Copernicus journal article supplement (doi:10.5194/acp-20-12133-2020), 2020-10-26

### Peak assignment of NMHCs in the chromatograms

| Peak no. | Compound                | Peak no. | Compound                 | Peak no. | Compound                |
|----------|-------------------------|----------|--------------------------|----------|-------------------------|
| 1        | Methylcyclopentane      | 18       | <i>n</i> -Propylbenzene  | 35       | 1-Butene                |
| 2        | 2,4-Dimethylpentane     | 19       | <i>m</i> -Ethyltoluene   | 36       | <i>cis</i> -2-Butene    |
| 3        | Benzene                 | 20       | <i>p</i> -Ethyltoluene   | 37       | Cyclopentane            |
| 4        | Cyclohexane             | 21       | 1,3,5-Trimethylbenzene   | 38       | <i>i</i> -Pentane       |
| 5        | 2-Methylhexane          | 22       | <i>o</i> -Ethyltoluene   | 39       | <i>n</i> -Pentane       |
| 6        | 2,3-Dimethylpentane     | 23       | 1,2,4-Trimethylbenzene   | 40       | <i>trans</i> -2-Pentene |
| 7        | 3-Methylhexane          | 24       | 1,2,3-Trimethylbenzene   | 41       | 1-Pentene               |
| 8        | <i>n</i> -Heptane       | 25       | <i>m</i> -Diethylbenzene | 42       | <i>cis</i> -2-Pentene   |
| 9        | Toluene                 | 26       | <i>p</i> -Diethylbenzene | 43       | 2,2-Dimethylbutane      |
| 10       | 2-Methylheptane         | 27       | Ethane                   | 44       | 2,3-Dimethylbutane      |
| 11       | 3-Methylheptane         | 28       | Ethene                   | 45       | 2-Methylpentane         |
| 12       | <i>n</i> -Octane        | 29       | Propane                  | 46       | 3-Methylpentane         |
| 13       | Ethylbenzene            | 30       | Propene                  | 47       | <i>n</i> -Hexane        |
| 14       | m/p-Xylene              | 31       | <i>i</i> -Butane         | 48       | Isoprene                |
| 15       | Styrene                 | 32       | <i>n</i> -Butane         | 49       | 1-Hexene                |
| 16       | <i>o</i> -Xylene        | 33       | Acetylene                |          |                         |
| 17       | <i>i</i> -Propylbenzene | 34       | <i>trans</i> -2-Butene   |          |                         |

# VOC standard 1

(Chemtron Science Laboratories Pvt. Ltd., Navi Mumbai, India)

## FID 1/DB-1 column

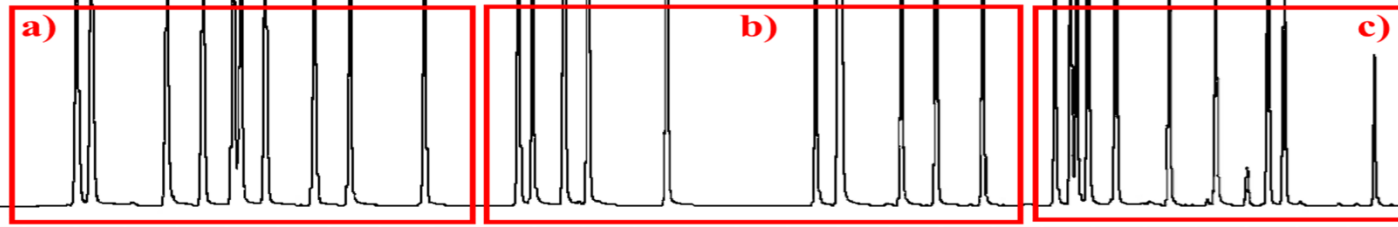

## FID 2/Alumina Plot Column

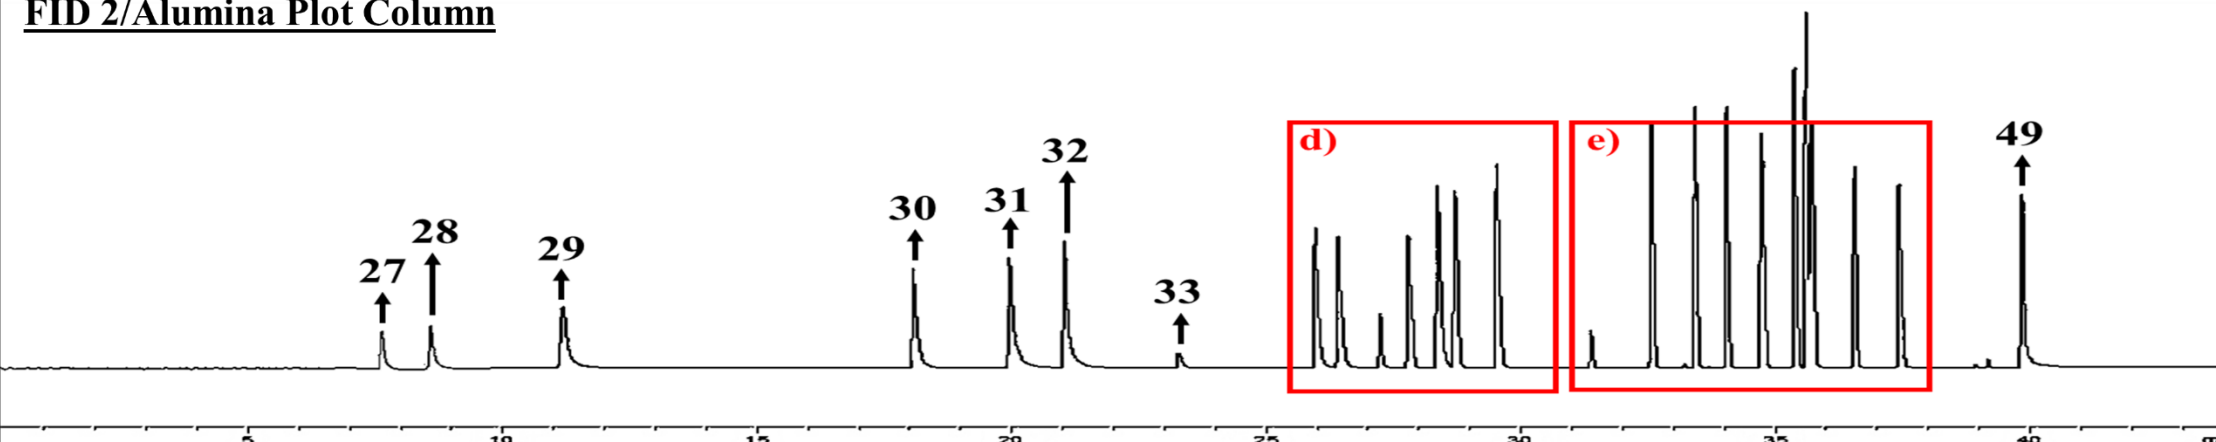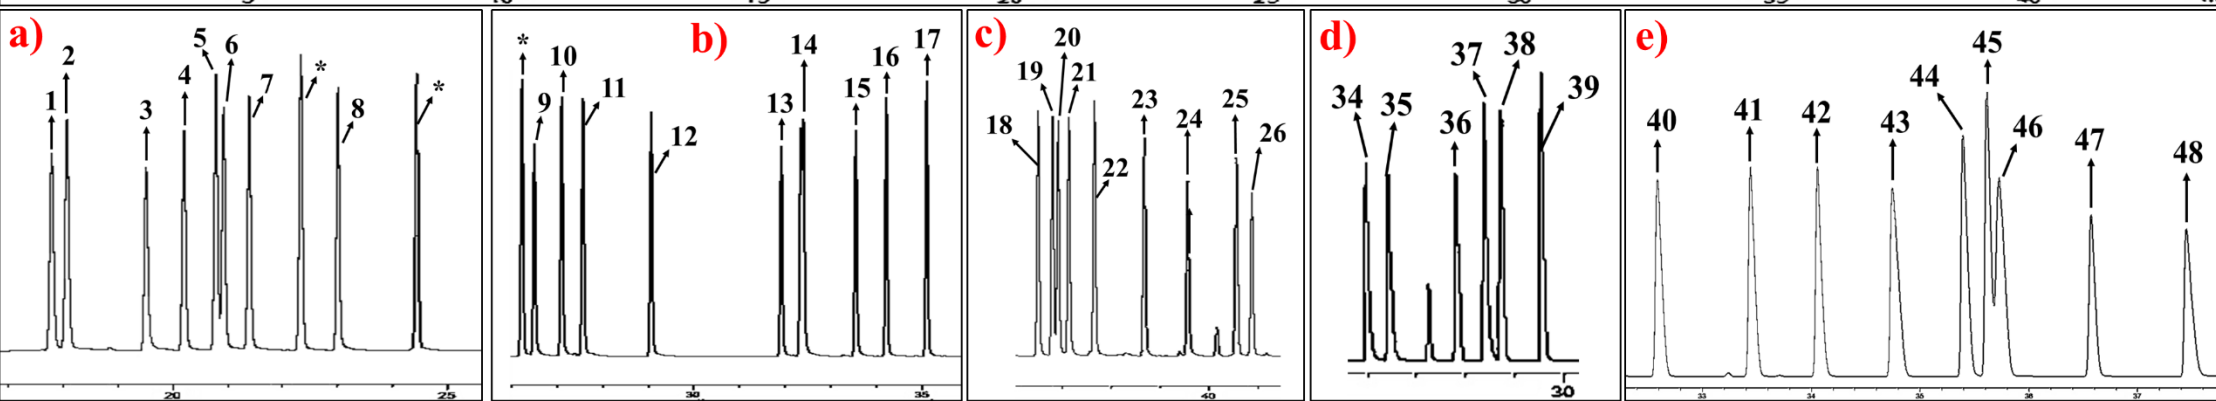

(Peaks marked as "\*" are the compounds that were present in the calibration standard but had poor peak features in certain sample chromatograms. Therefore, for remaining consistent across all sample analysis, these compounds were removed from analysis)

Paddy stubble burning (Flaming stage)

FID 1/DB-1 column

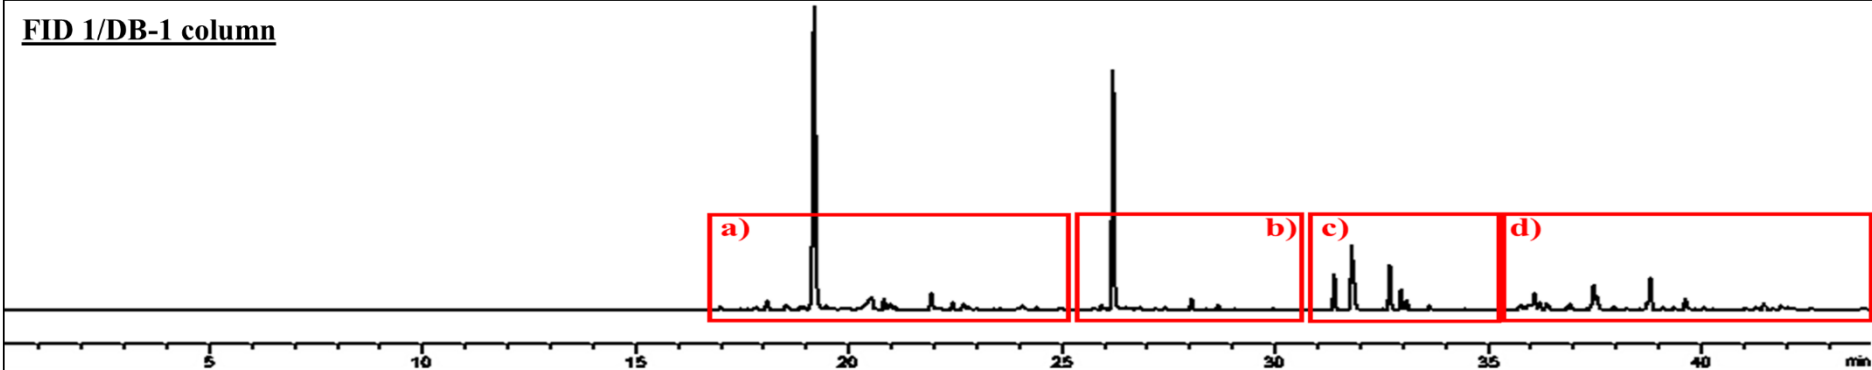

FID 2/Alumina Plot Column

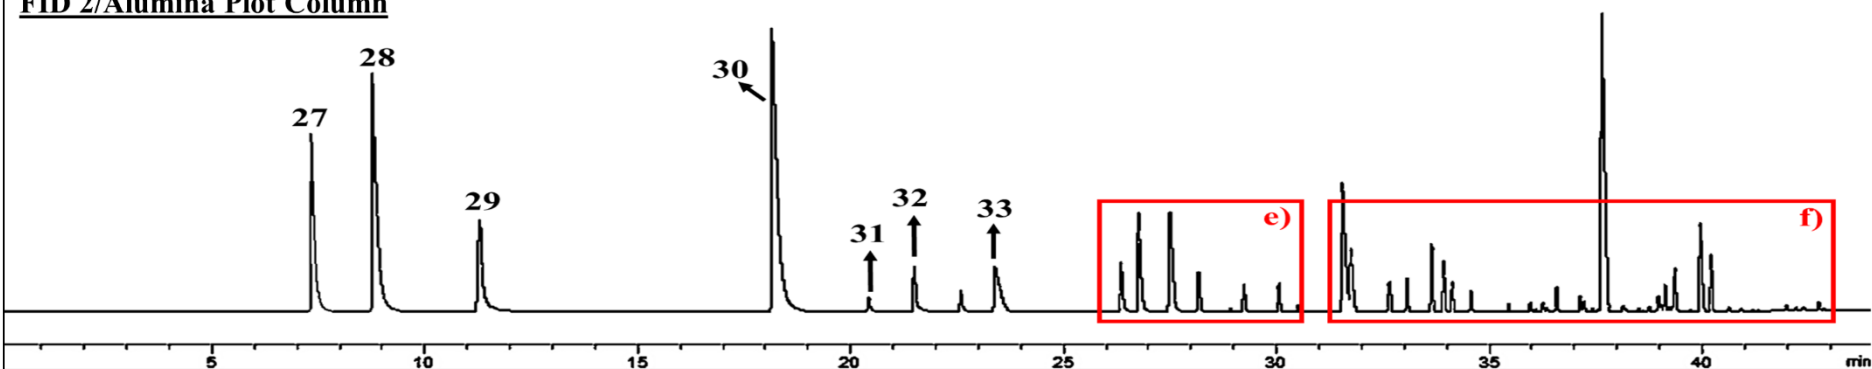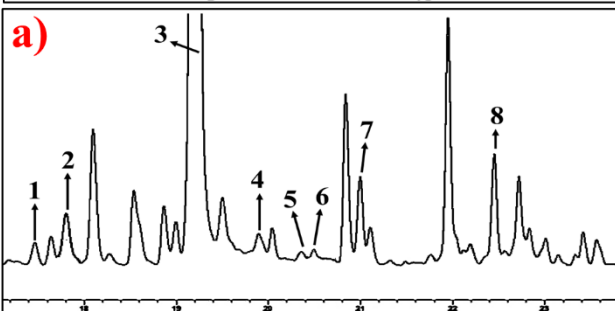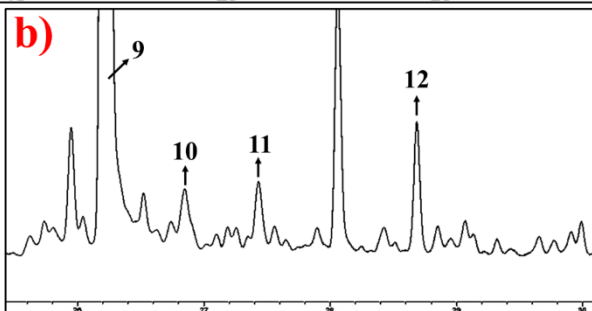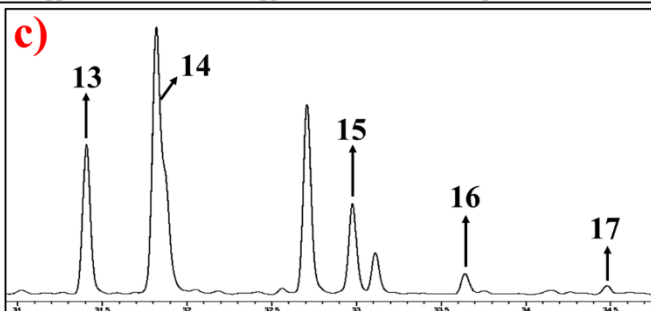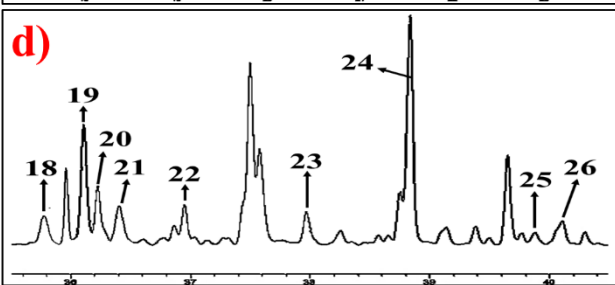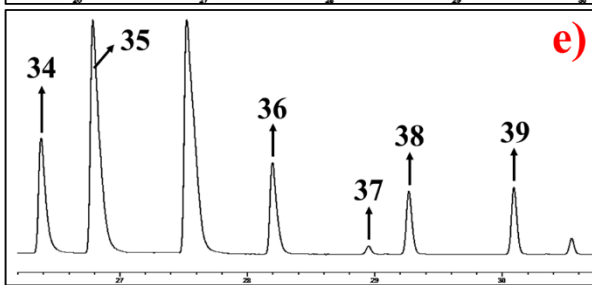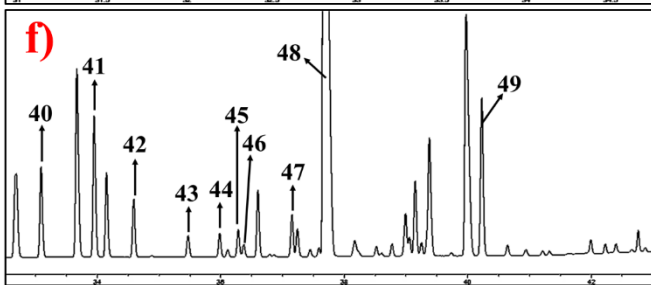

# Paddy stubble burning (Smoldering stage)

FID 1/DB-1 column

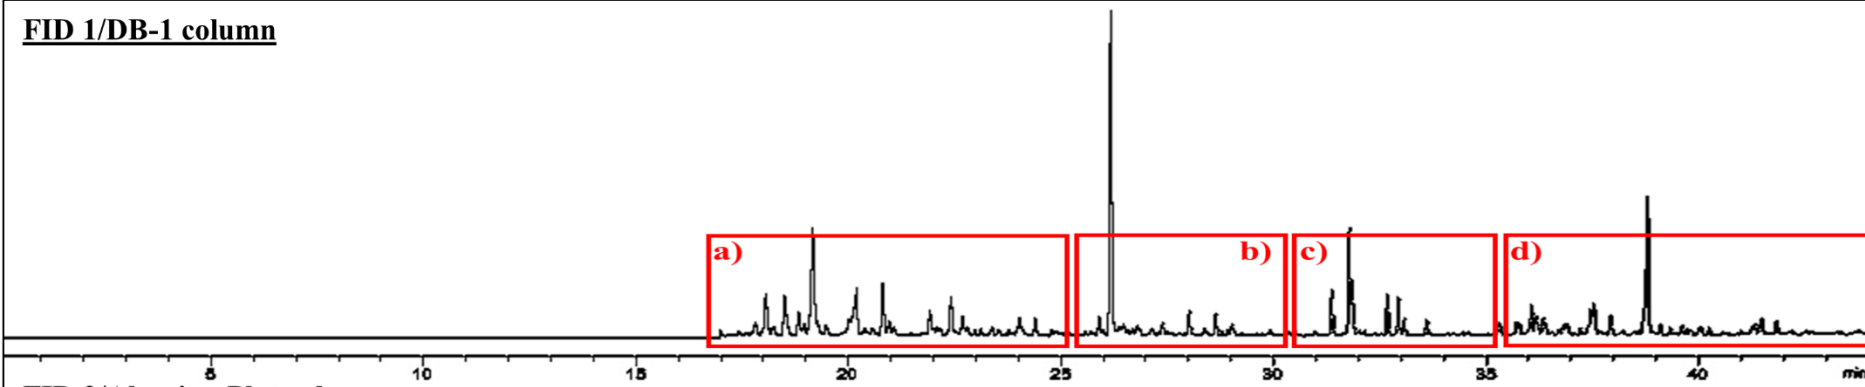

FID 2/Alumina Plot column

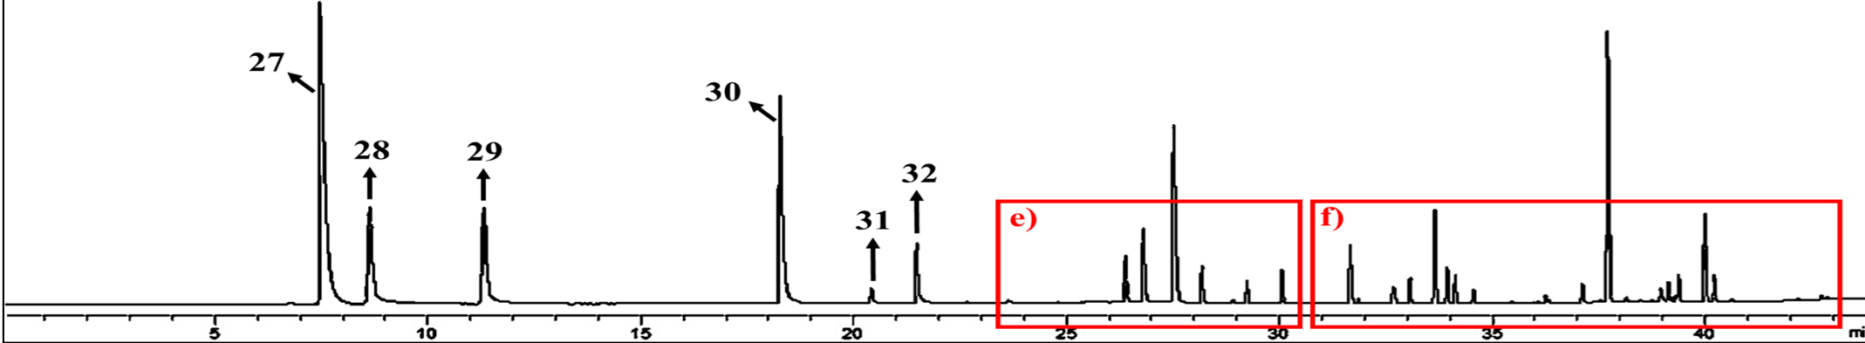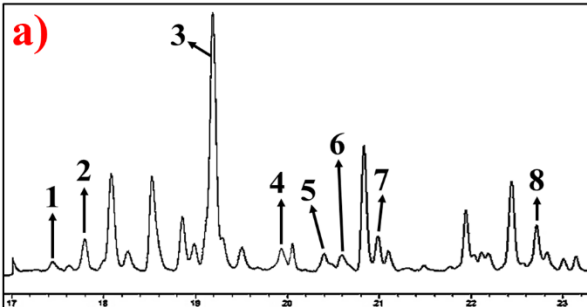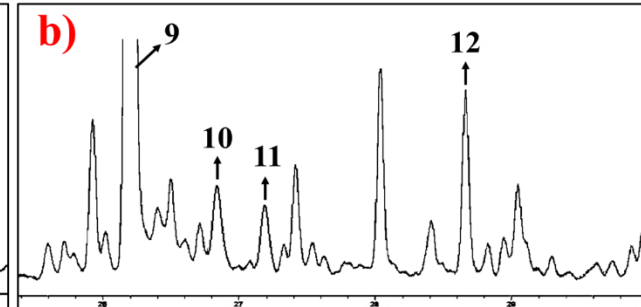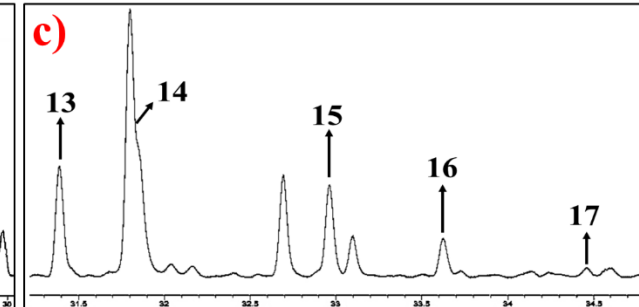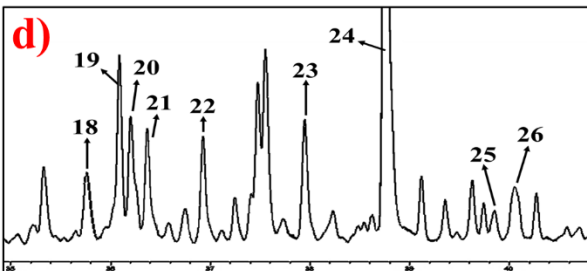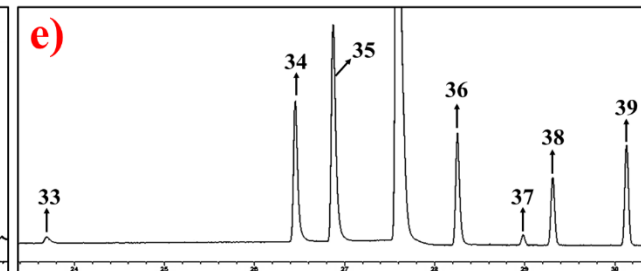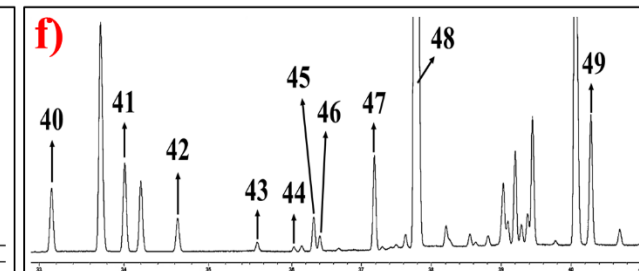

Garbage burning (Flaming stage)

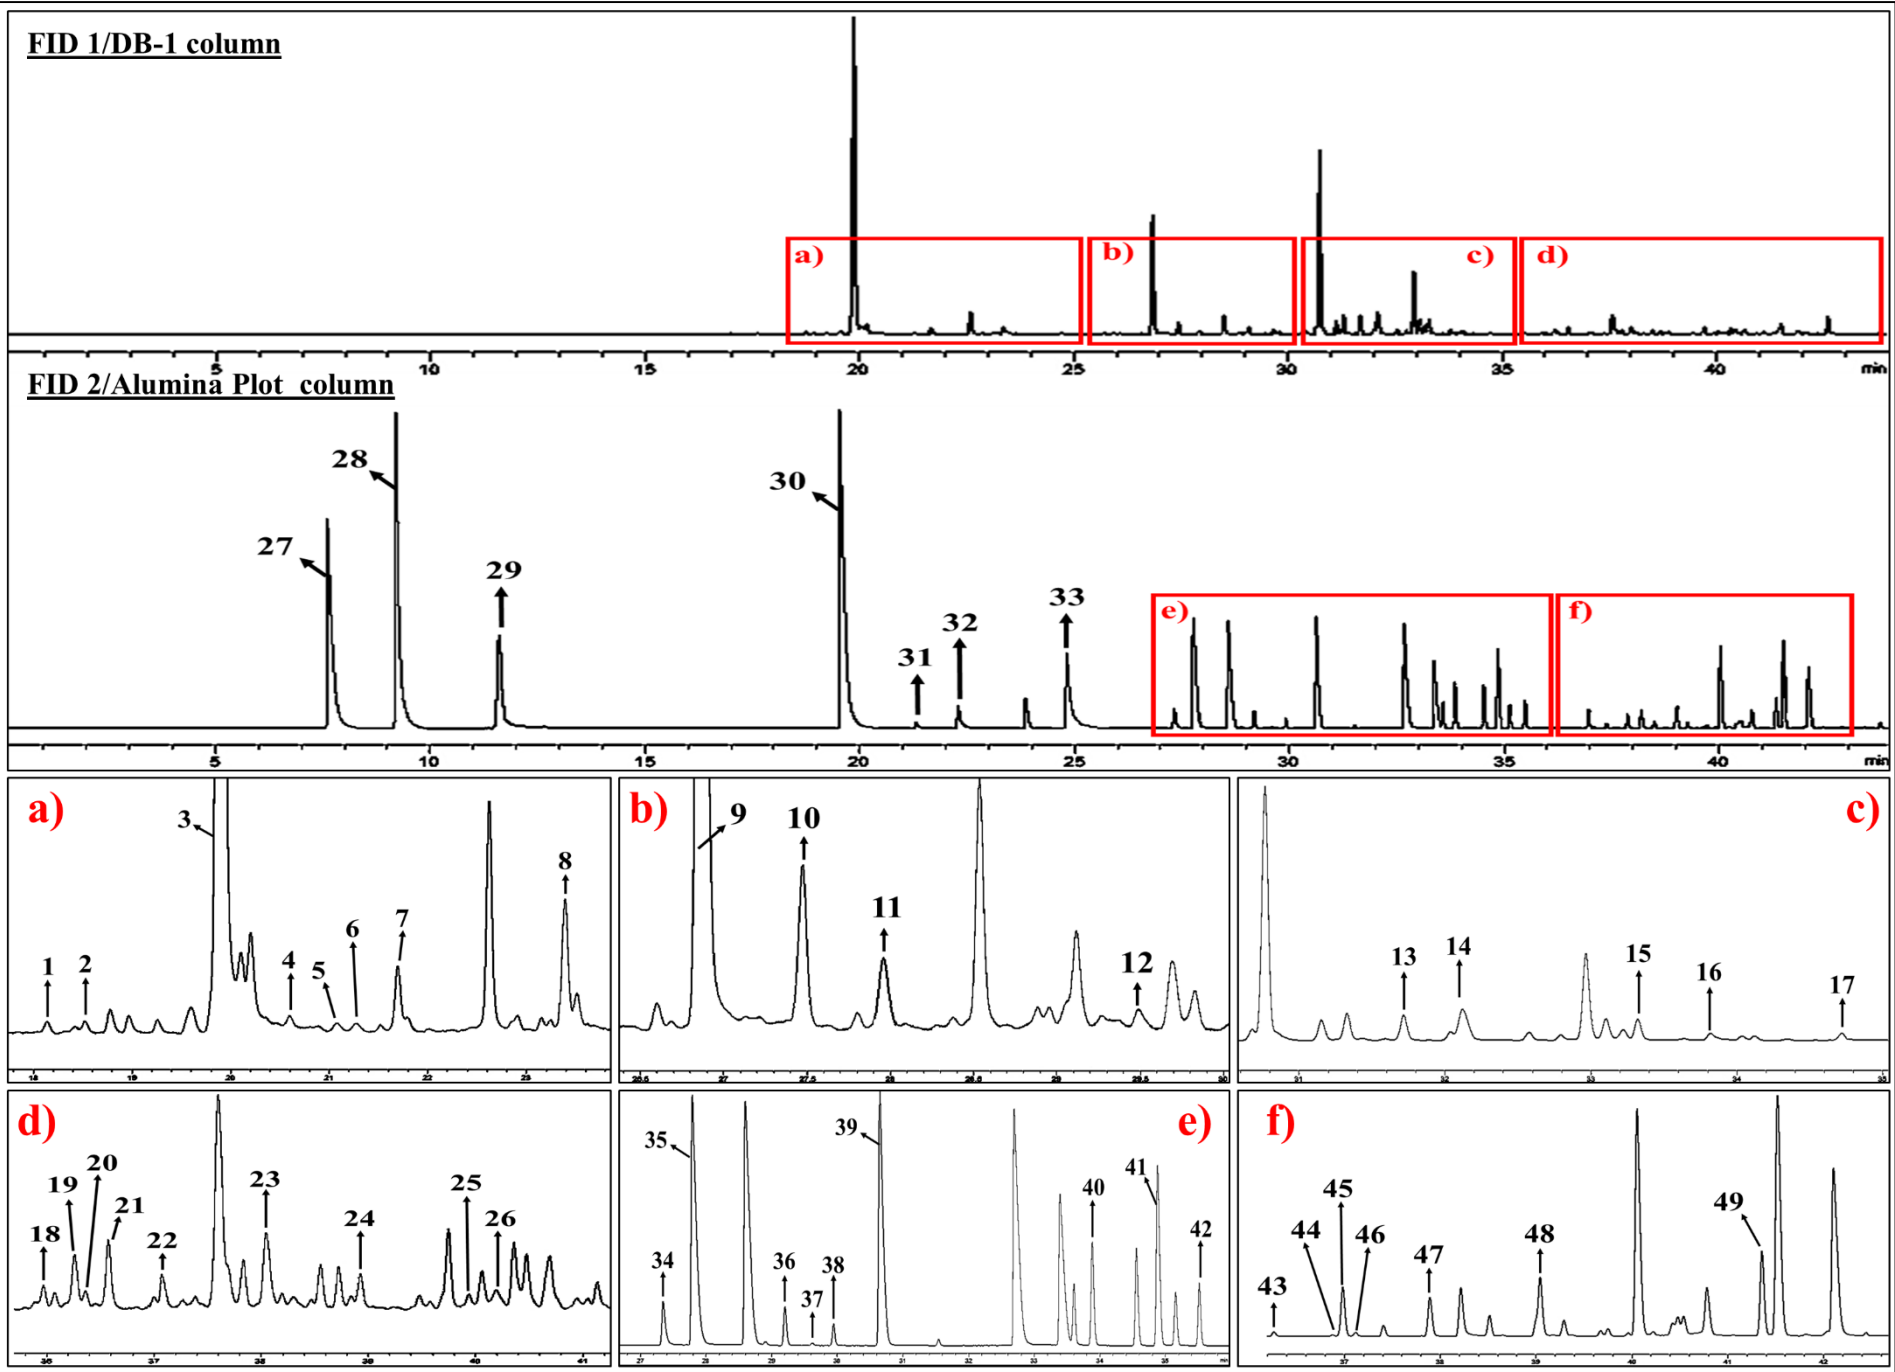

# Garbage burning (Smoldering stage)

FID 1/DB-1 column

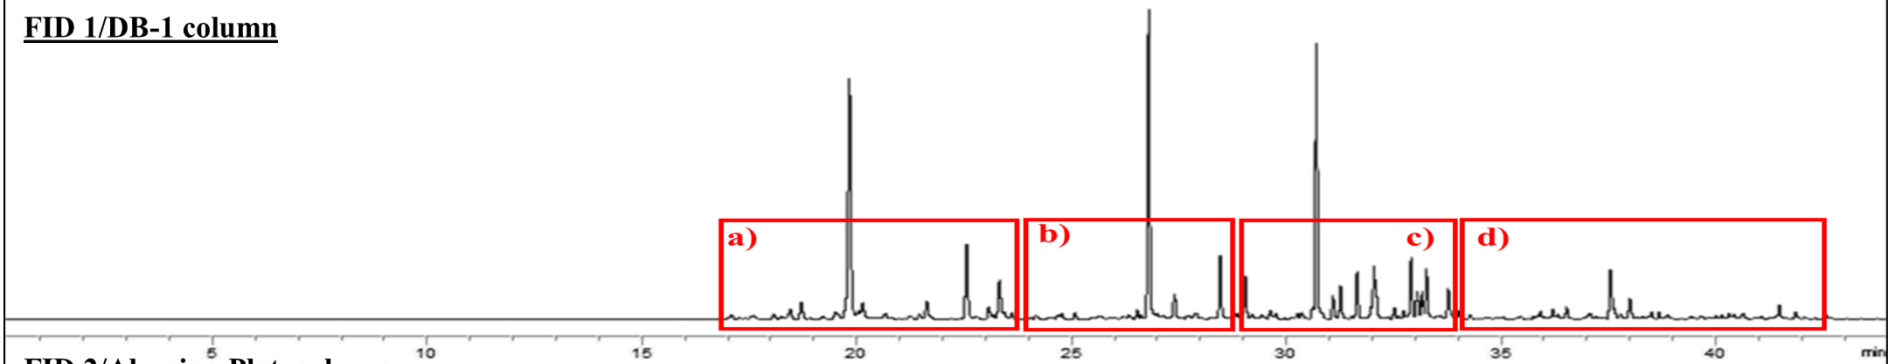

FID 2/Alumina Plot column

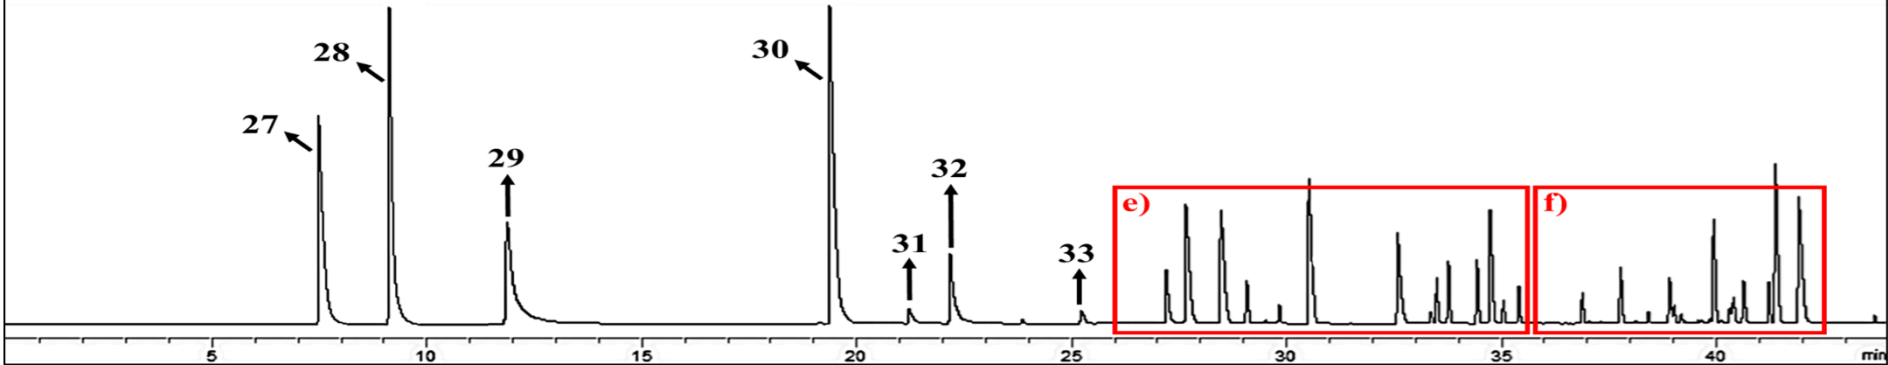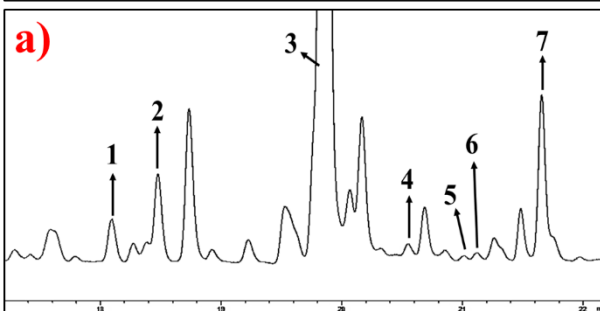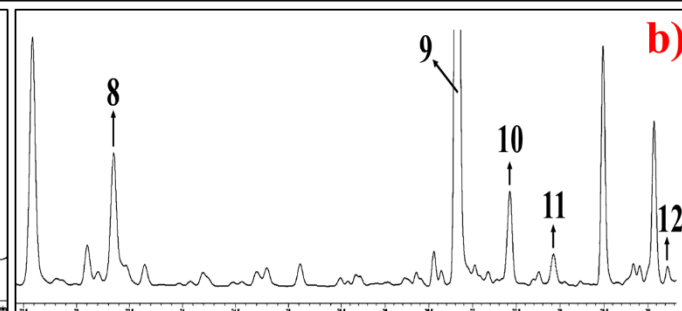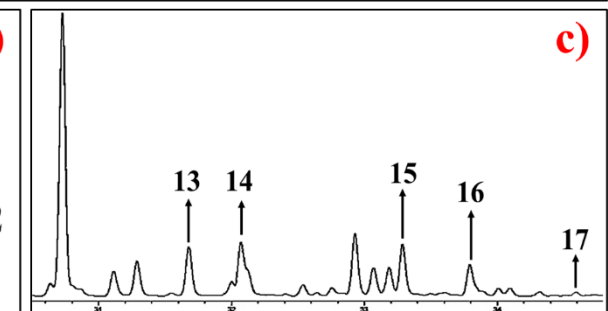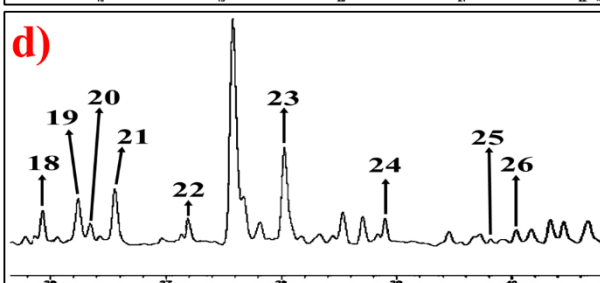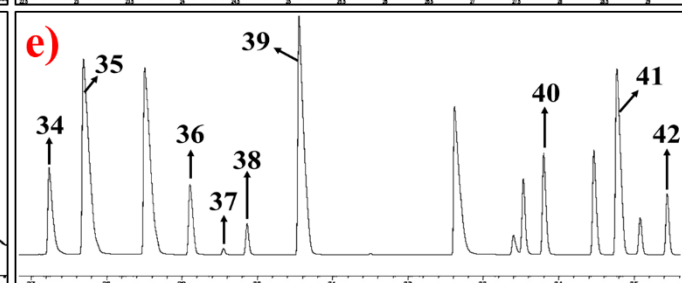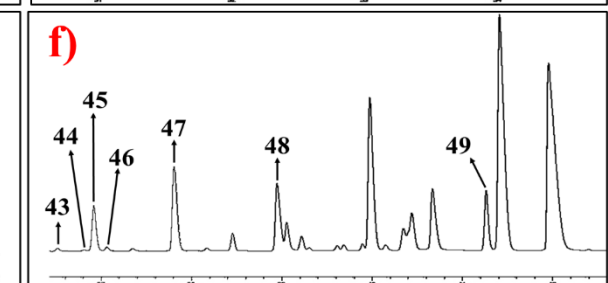

# Petrol vehicular exhaust (four-wheeler light duty vehicle)

FID 1/DB-1 column

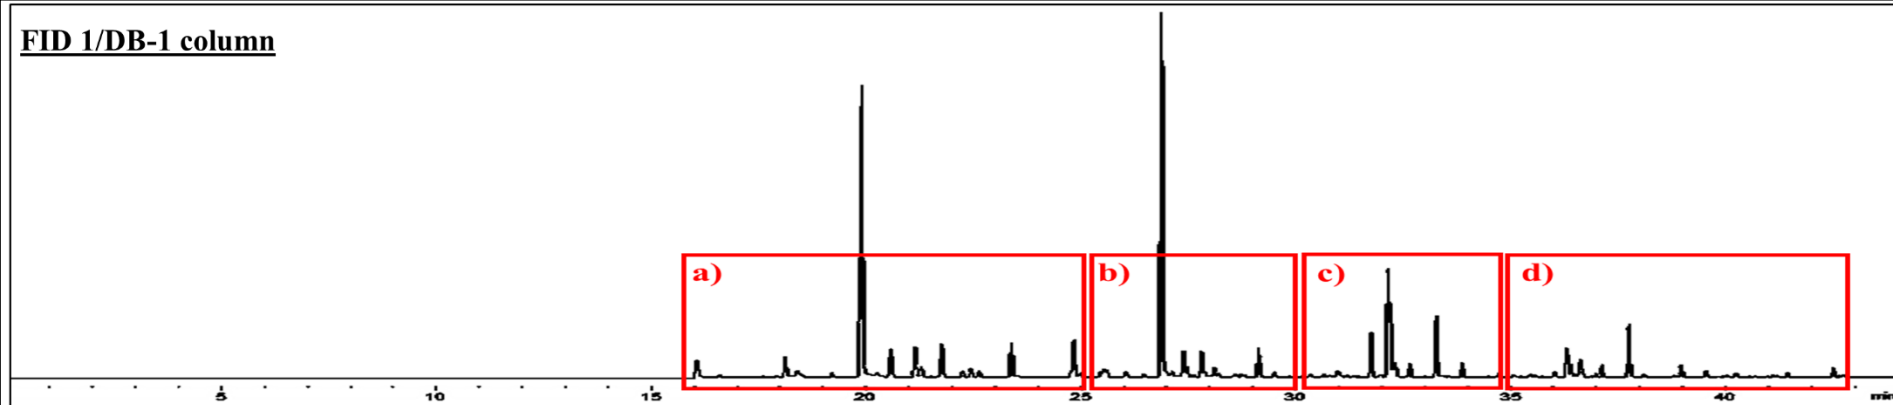

FID 2/Alumina Plot column

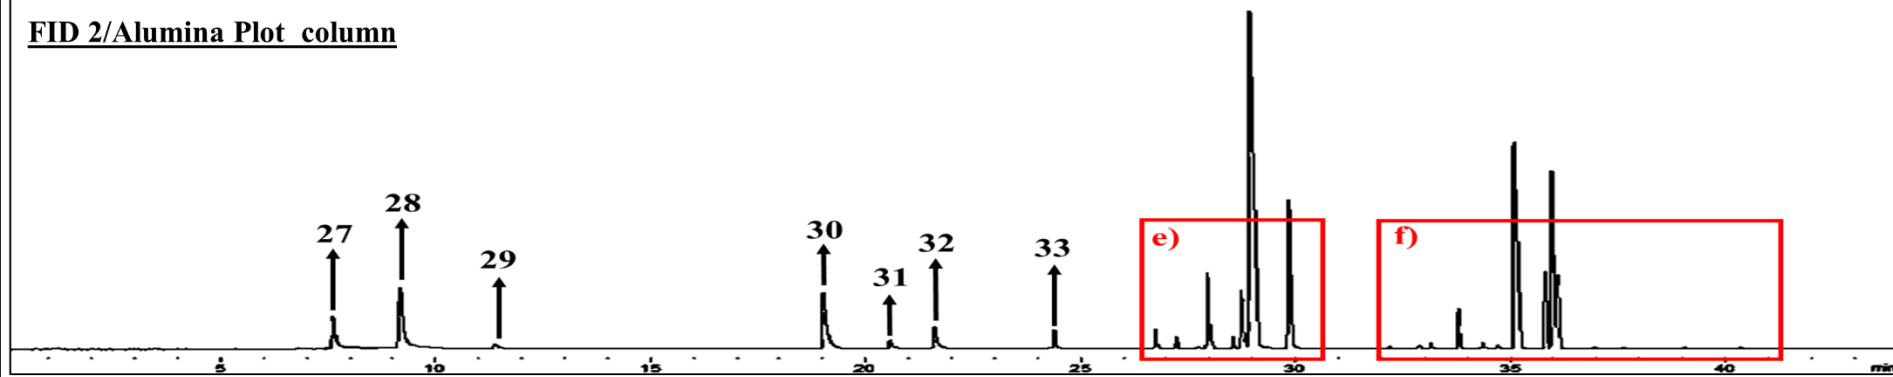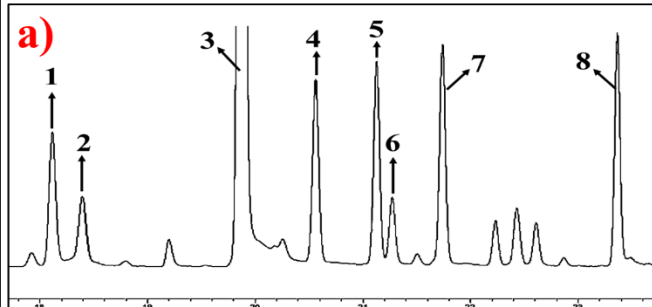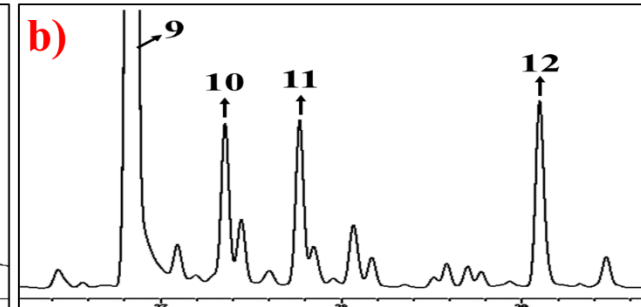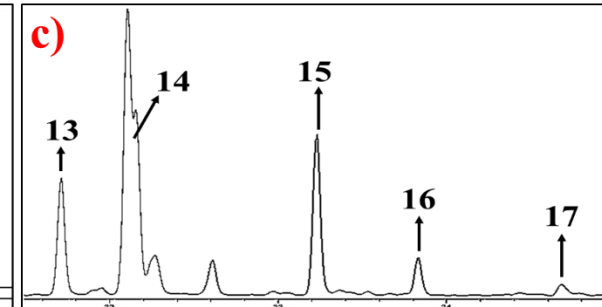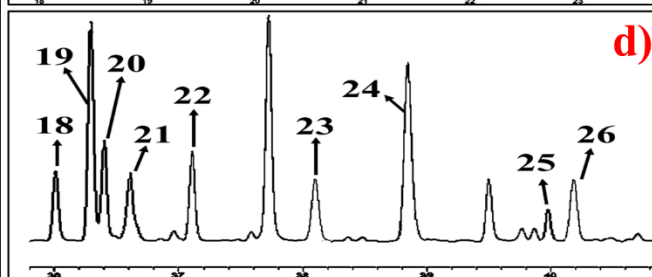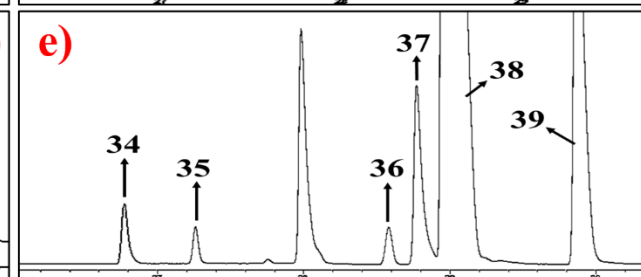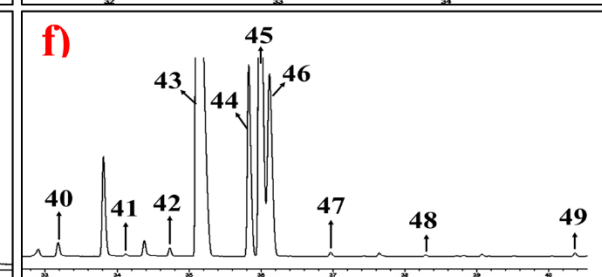

Petrol vehicular exhaust (two-wheeler)

FID 1/DB-1 column

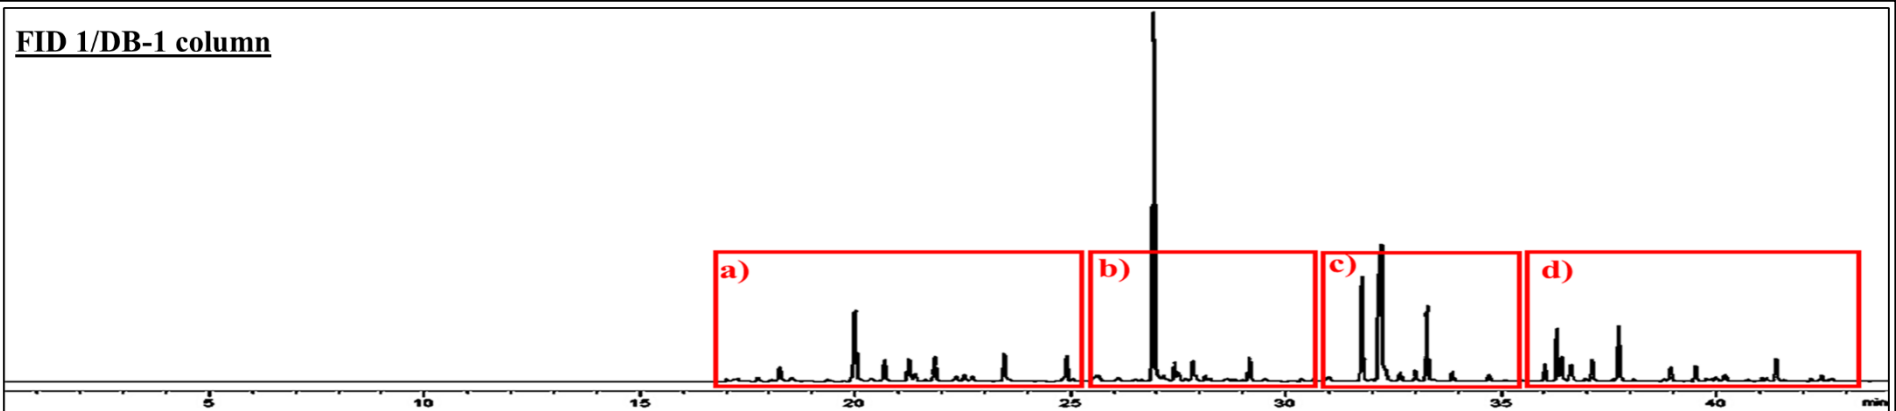

FID 2/Alumina Plot column

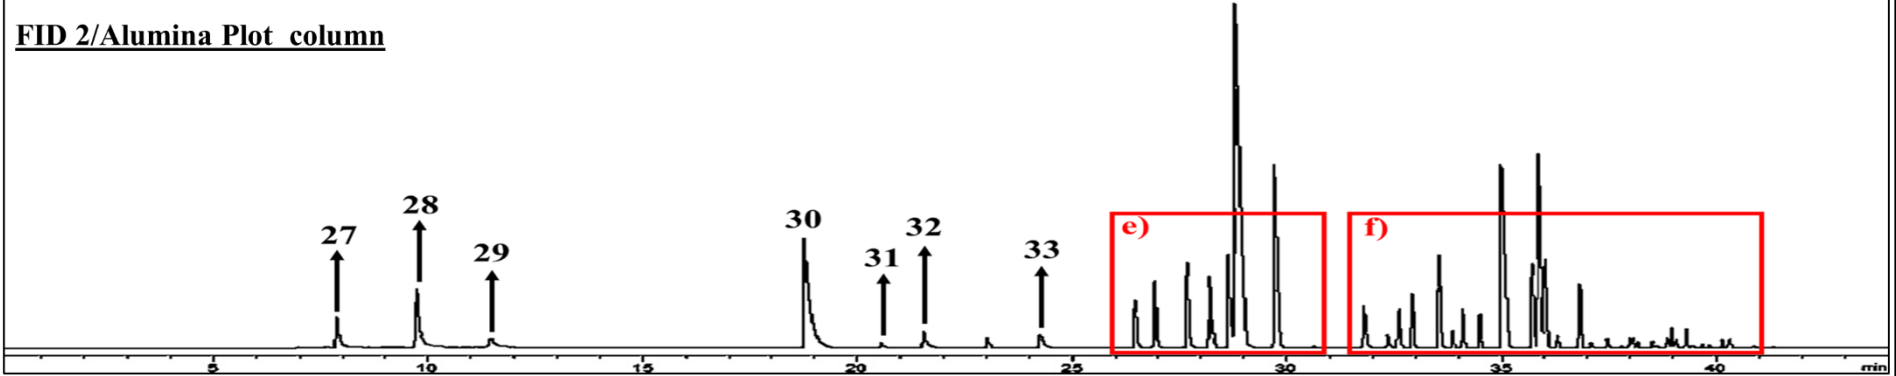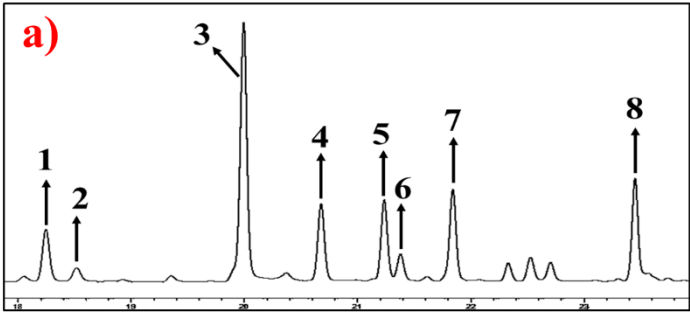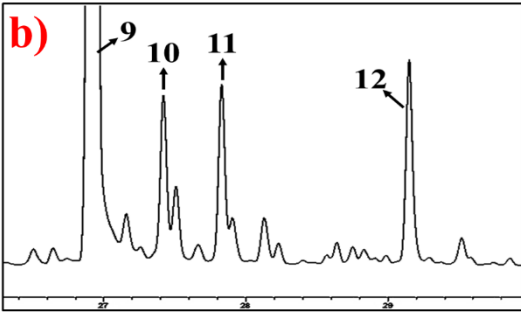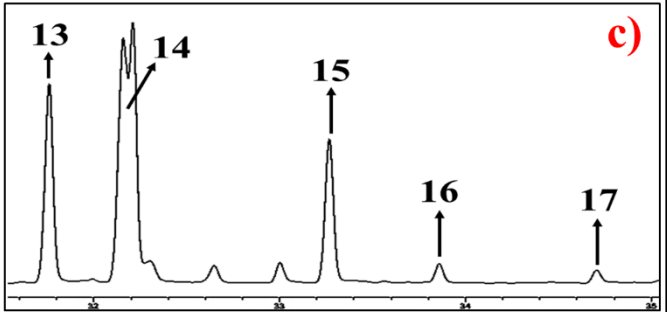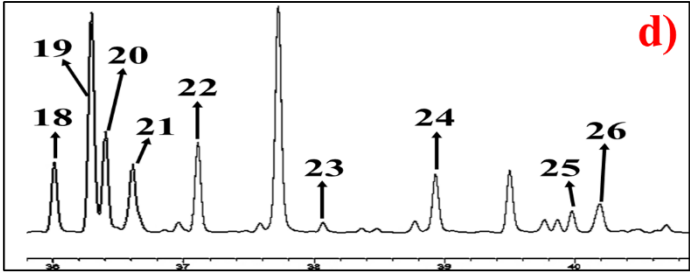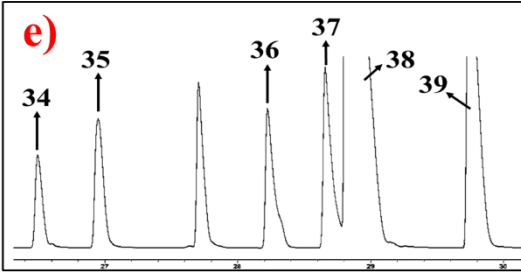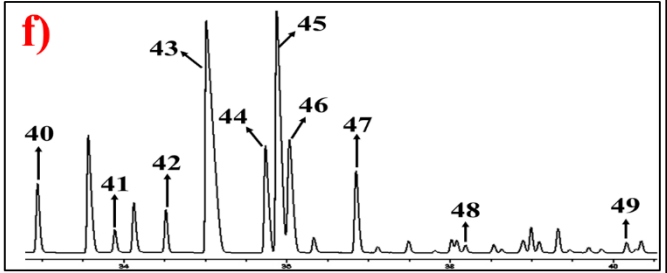

# Diesel vehicular exhaust (heavy duty vehicle)

FID 1/DB-1 column

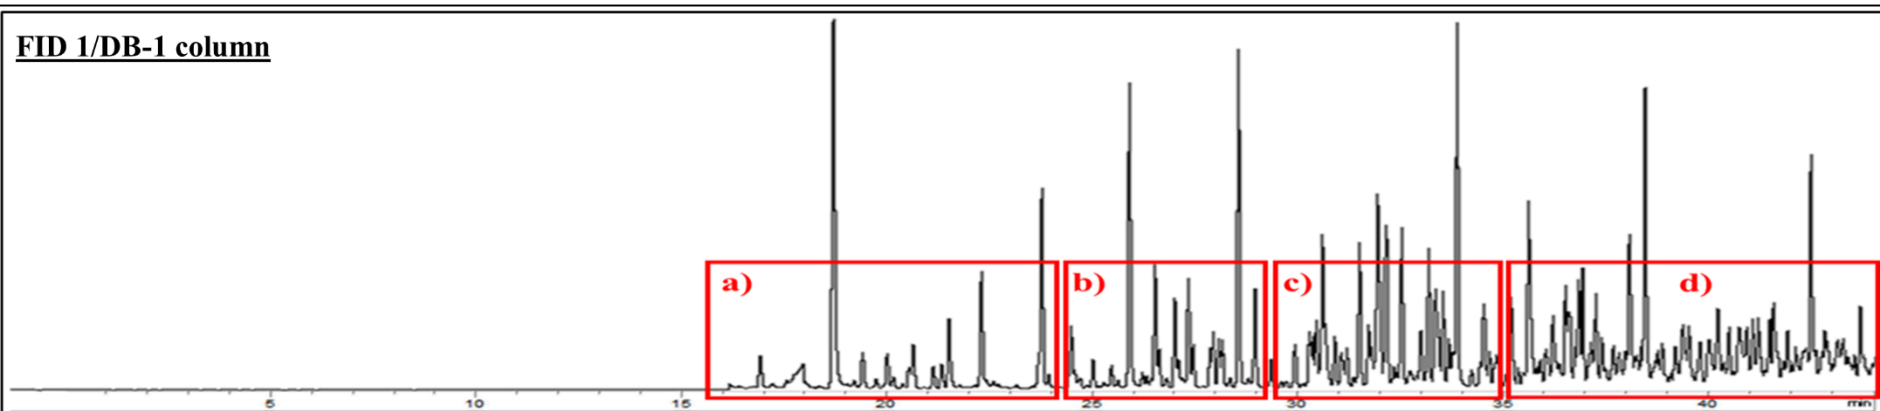

FID 2/Alumina Plot column

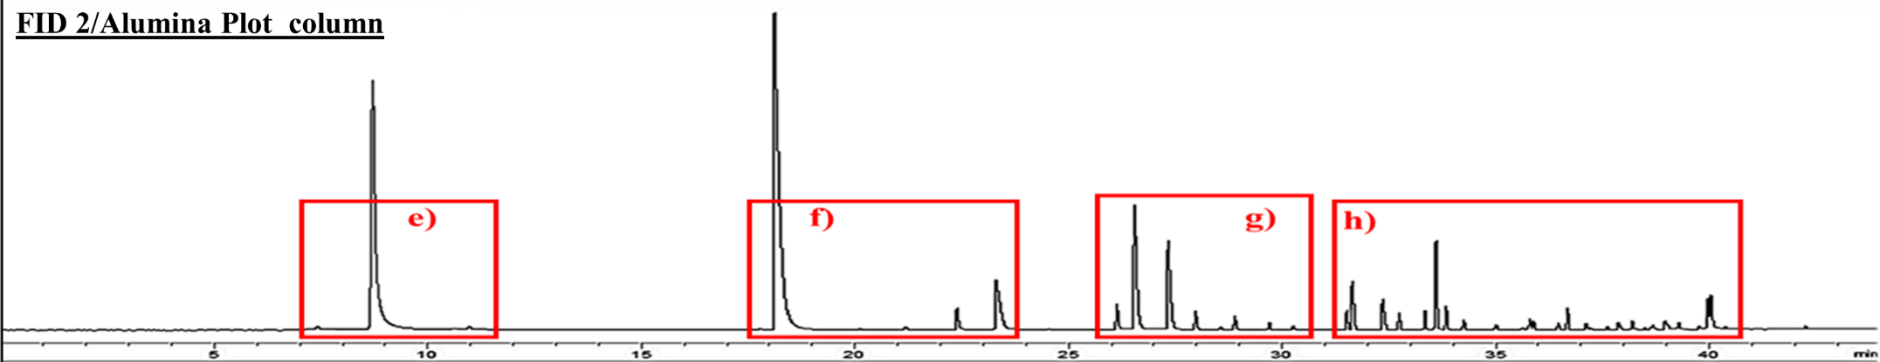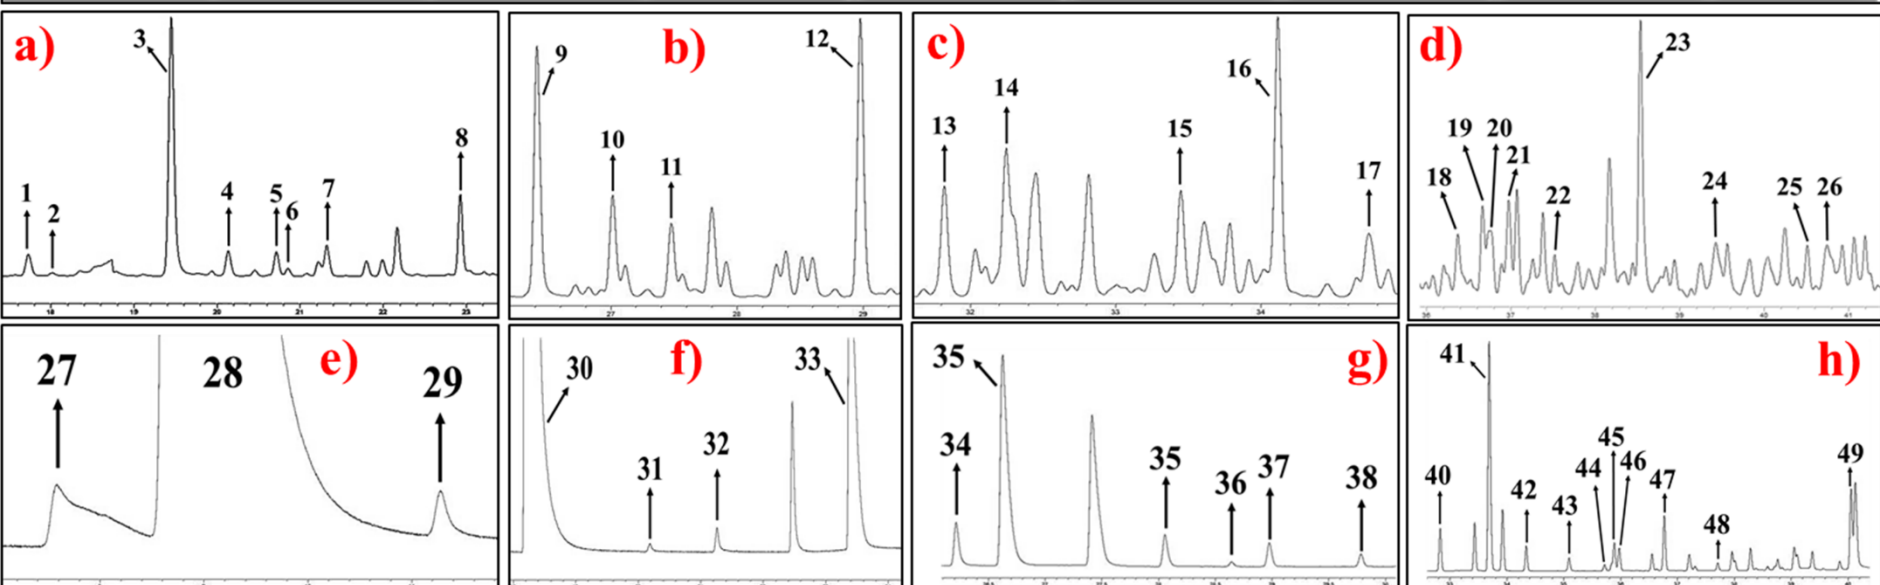

# Diesel vehicular exhaust (three wheeler light duty vehicle)

FID 1/DB-1 column

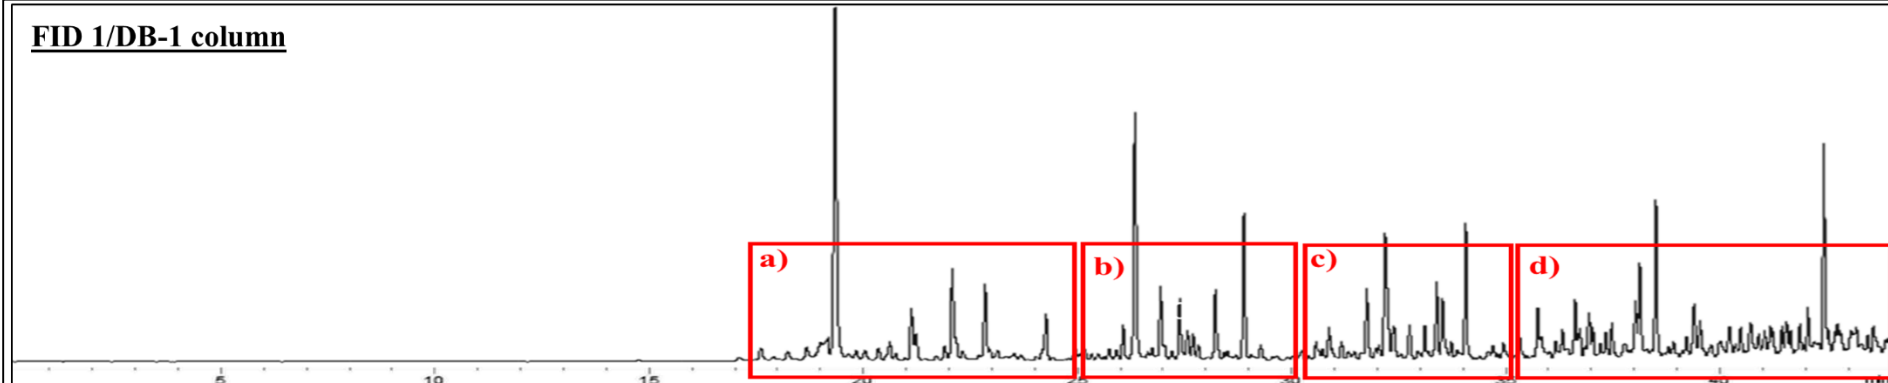

FID 2/Alumina Plot column

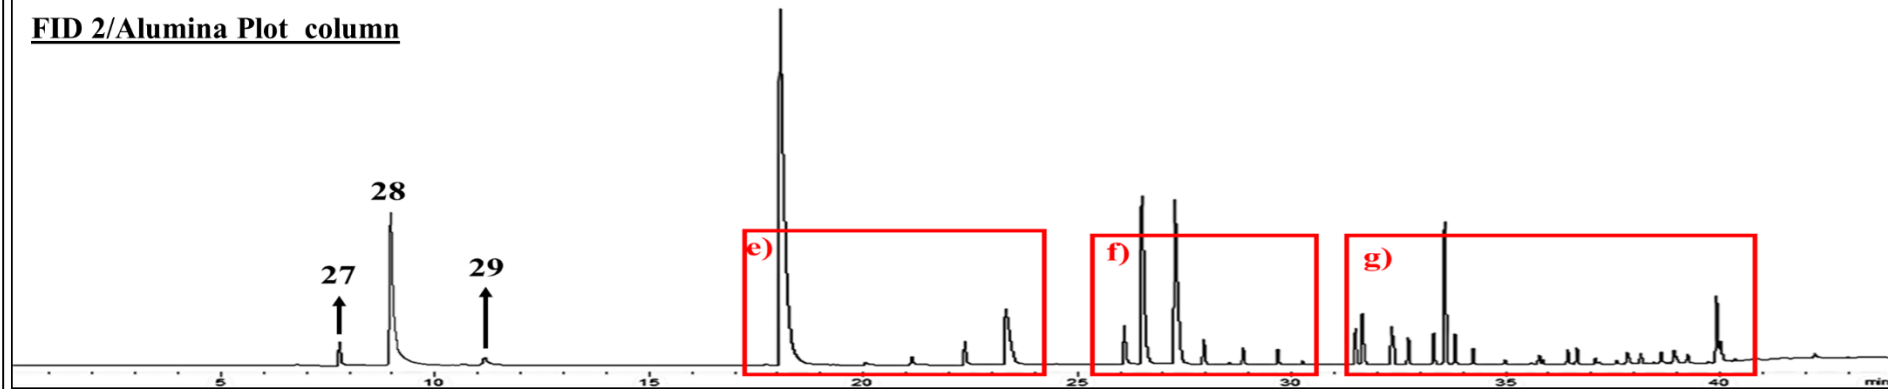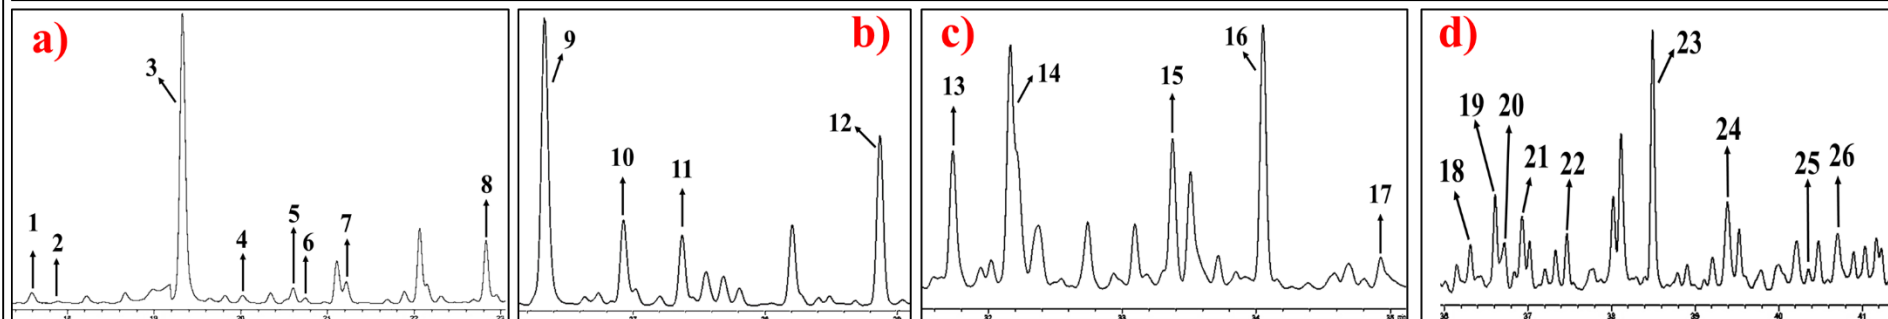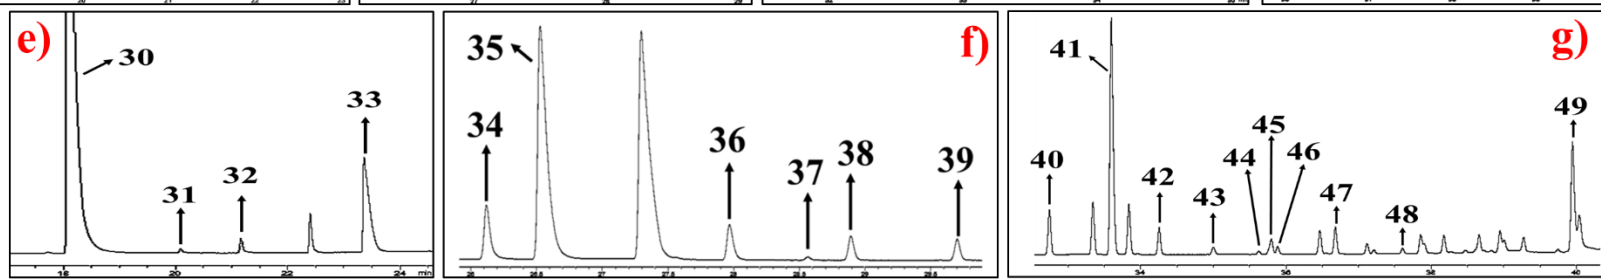

# Diesel vehicular exhaust (four wheeler light duty vehicle)

FID 1/DB-1 column

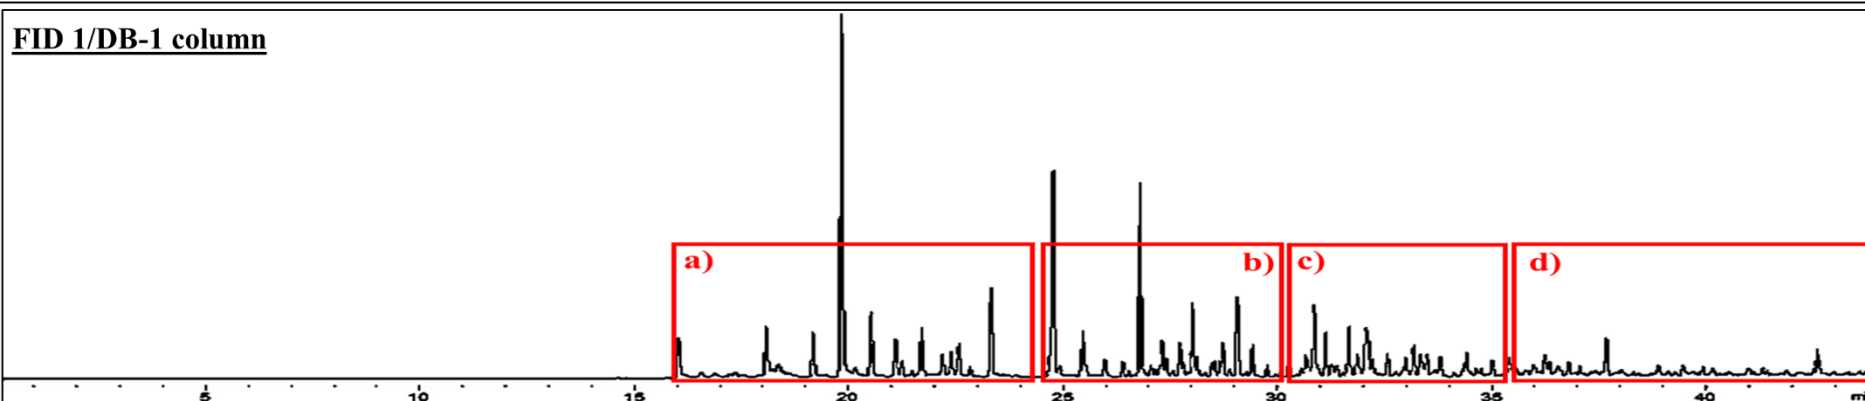

FID 2/Alumina Plot column

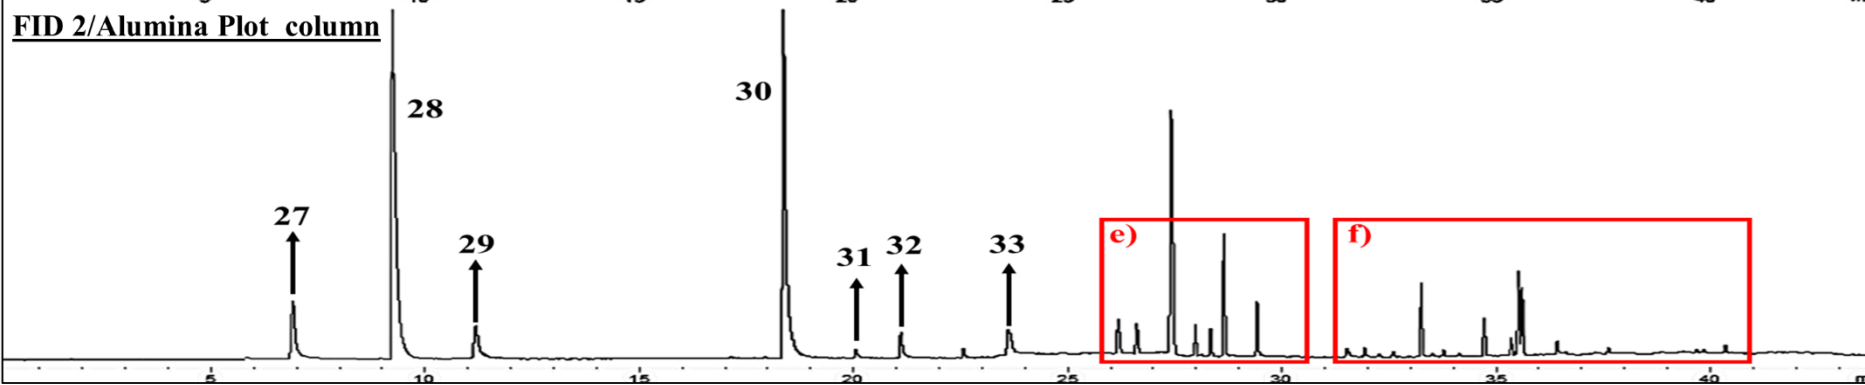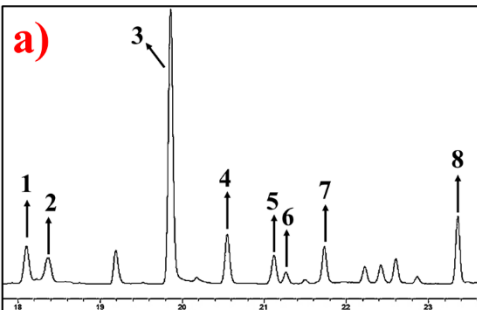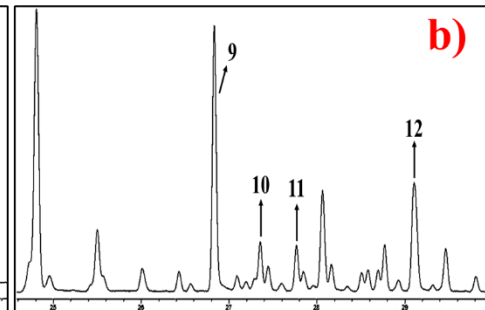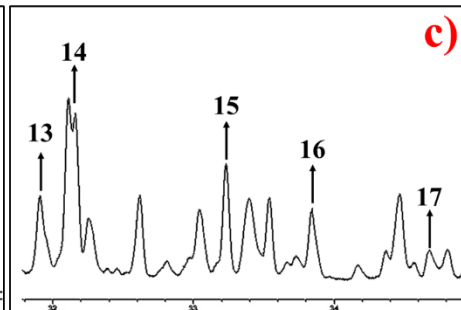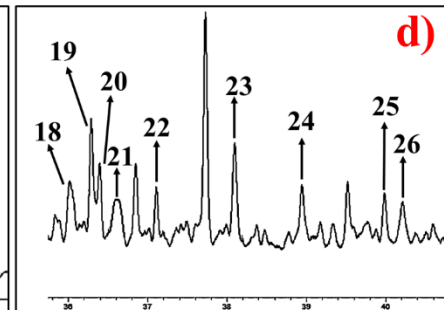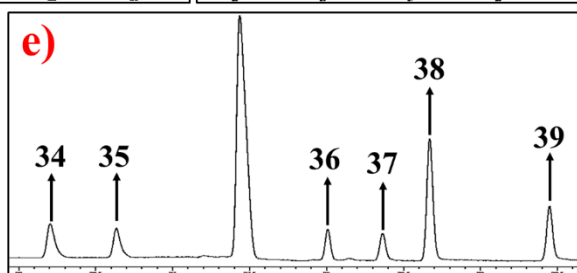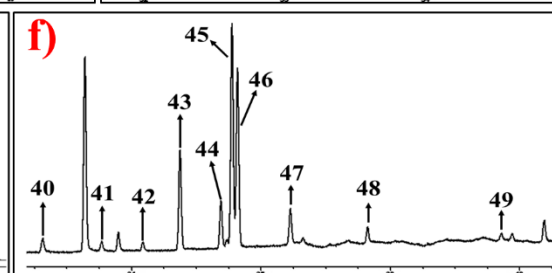

# LPG vehicular exhaust (three wheeler light duty vehicle)

FID 1/DB-1 column

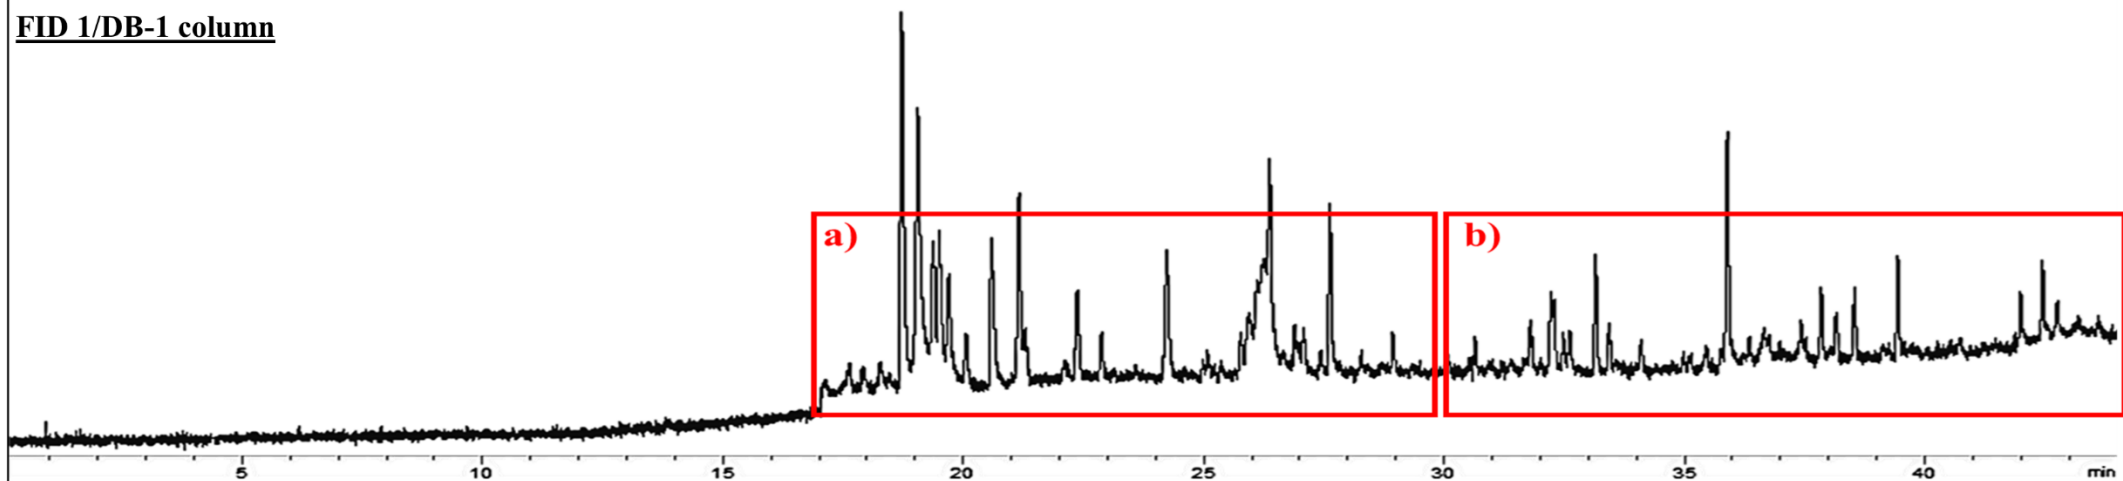

FID 2/Alumina Plot column

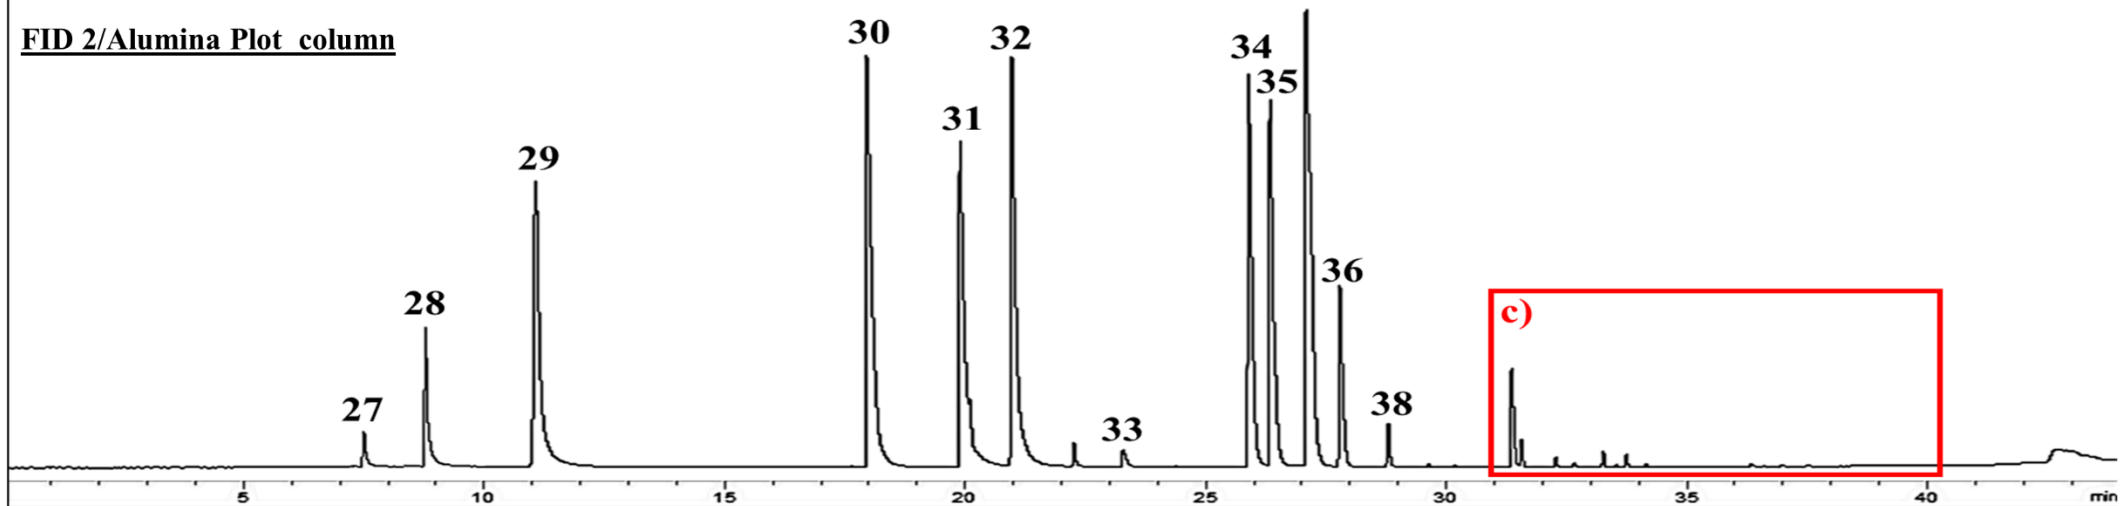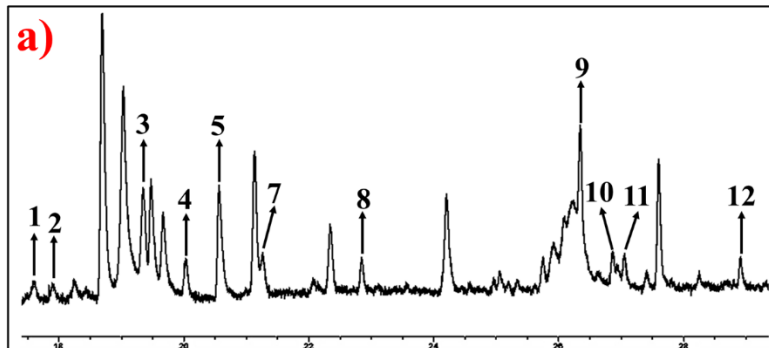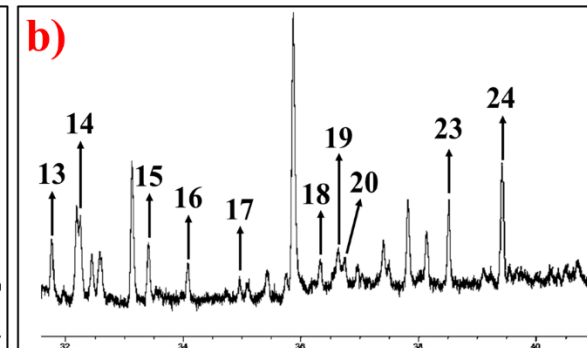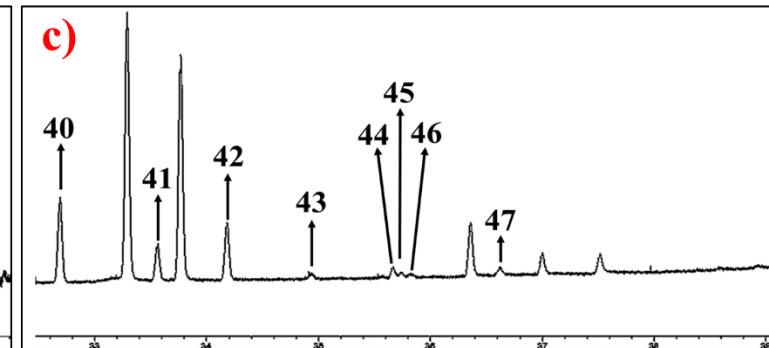

# CNG vehicular exhaust (three wheeler light duty vehicle)

FID 1/DB-1 column

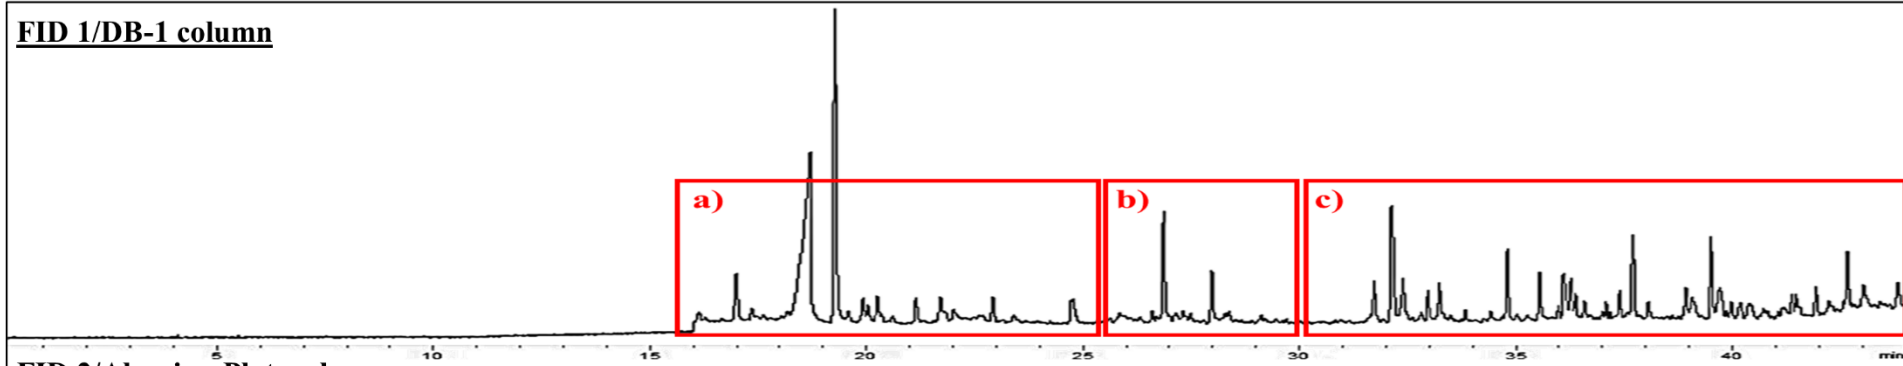

FID 2/Alumina Plot column

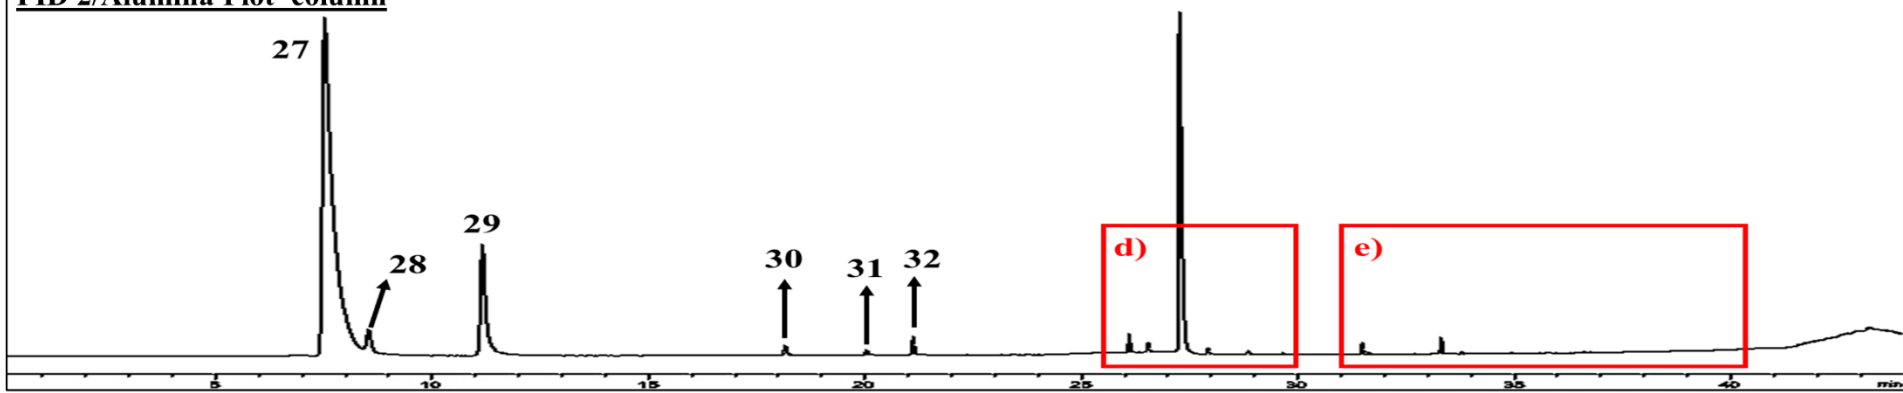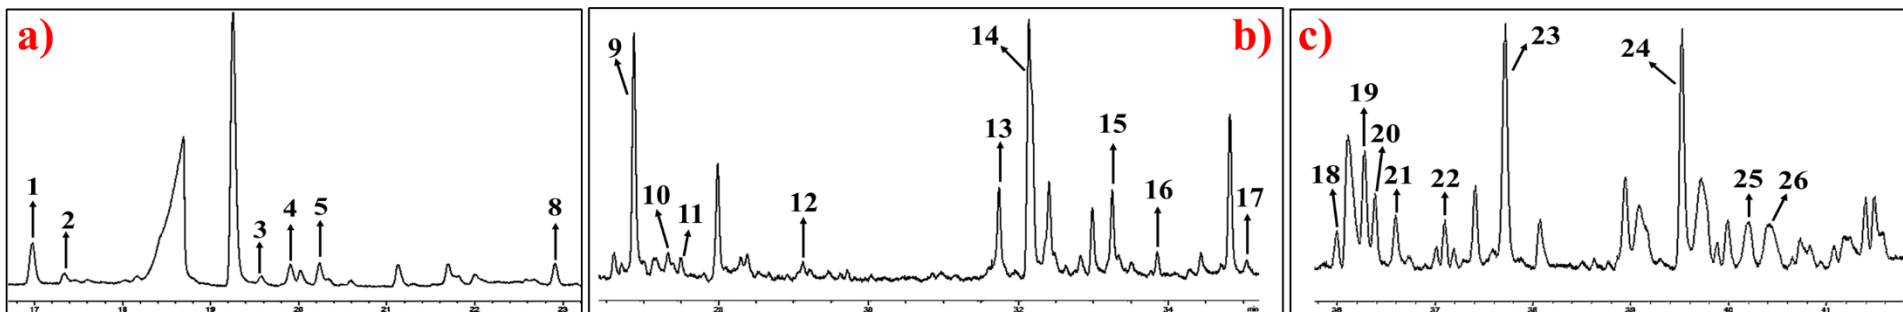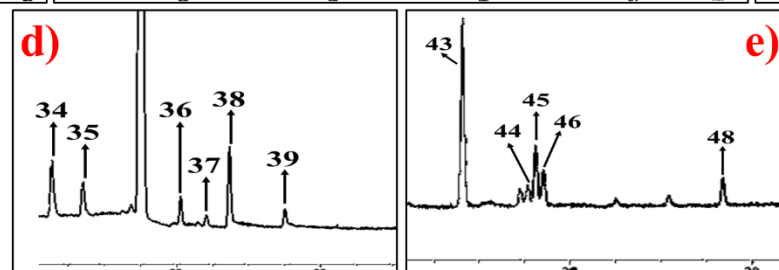

# Commercial LPG evaporative emissions

FID 1/DB-1 column

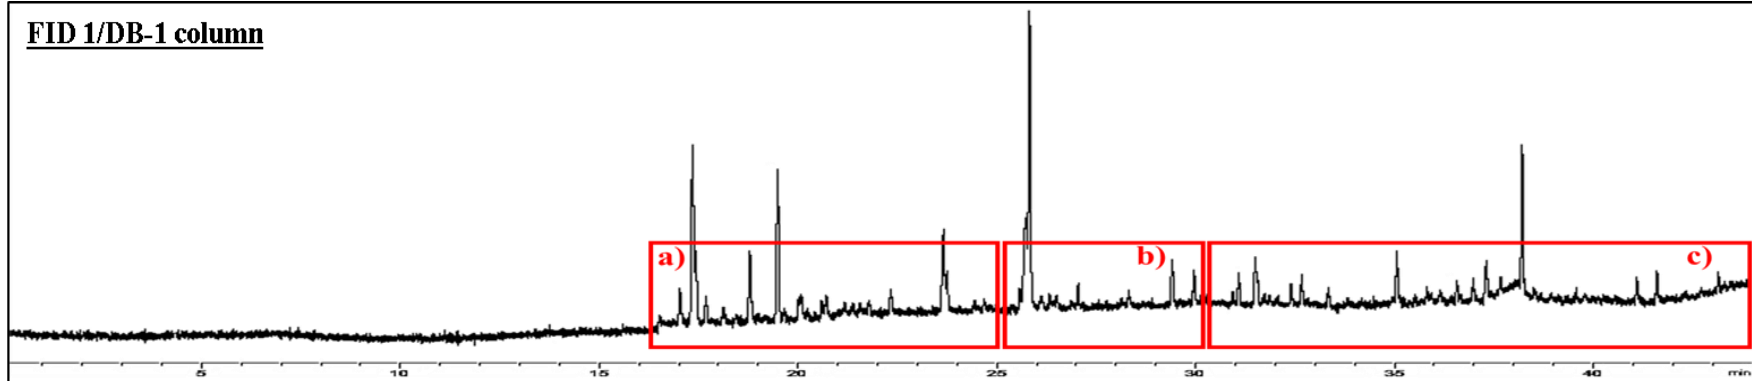

FID 2/Alumina Plot column

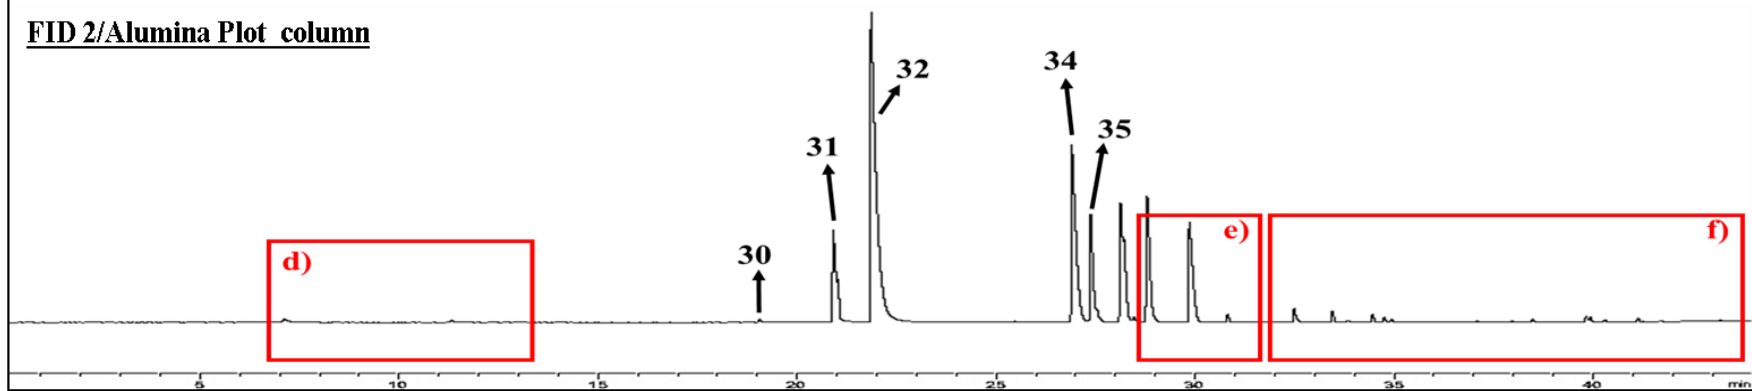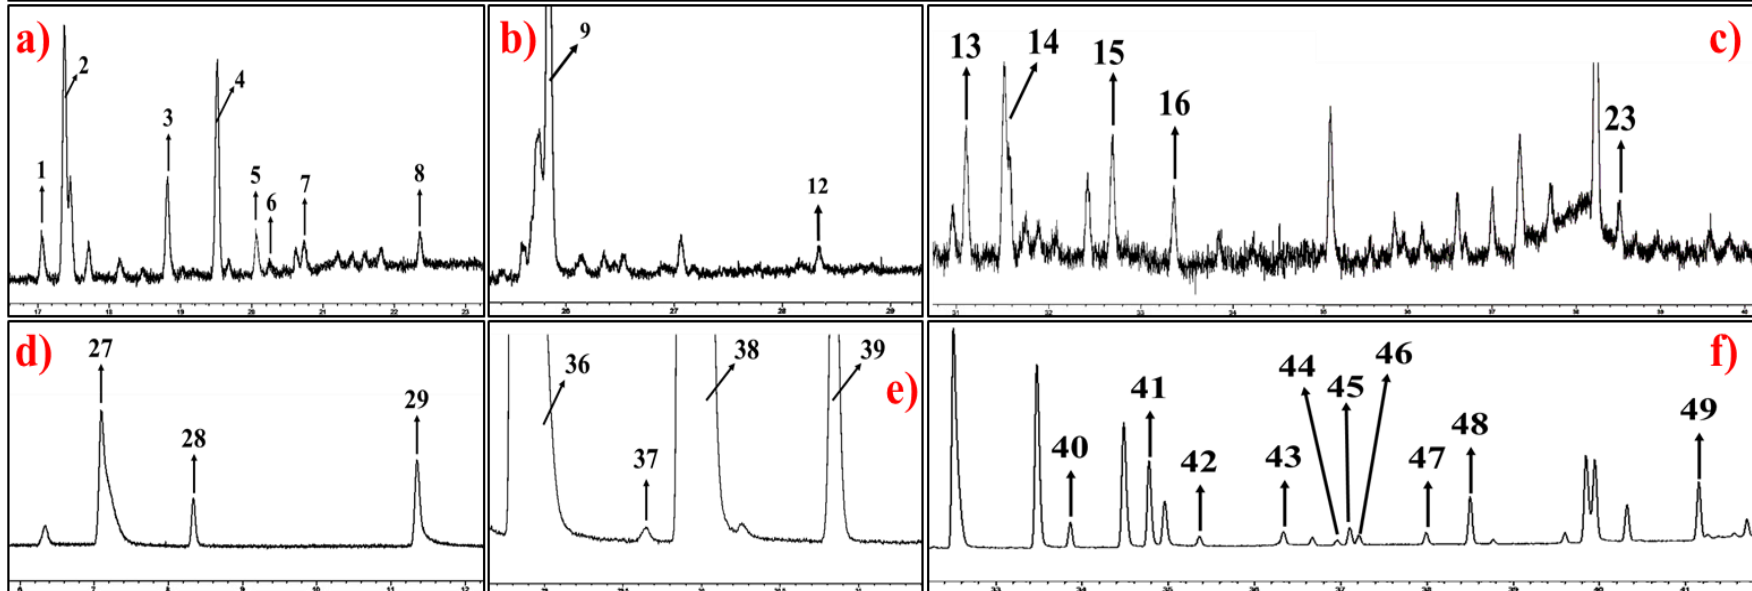

# Domestic LPG evaporative emissions

FID 1/DB-1 column

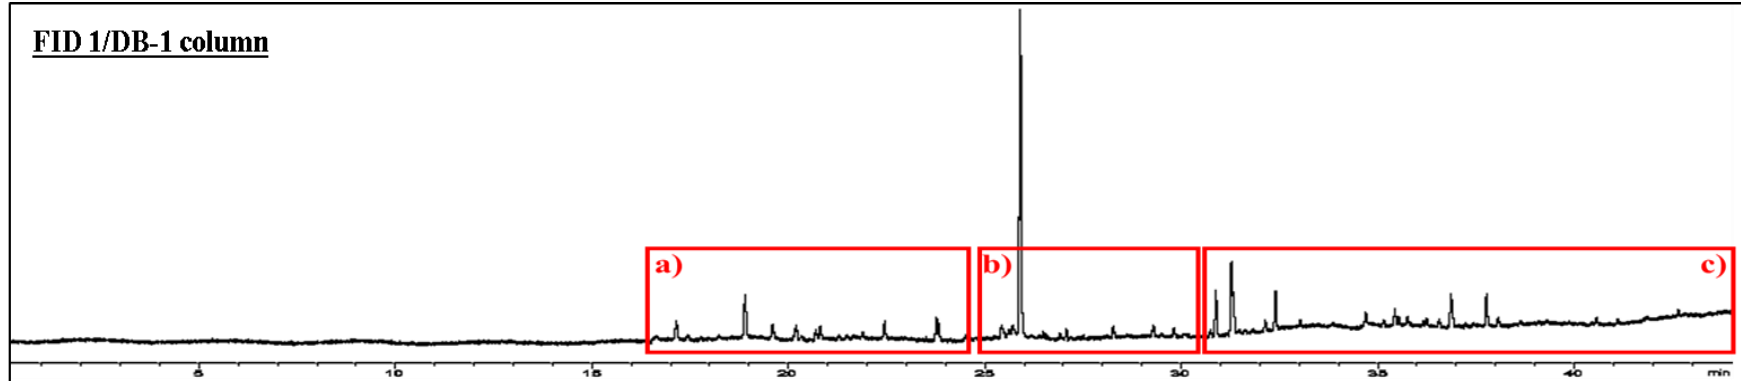

FID 2/Alumina Plot column

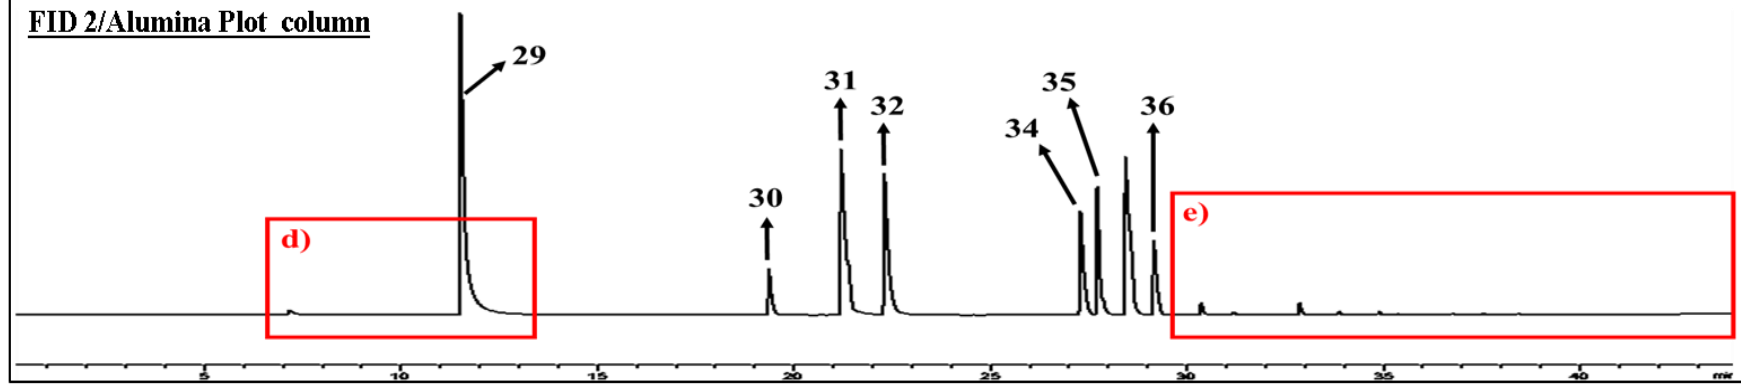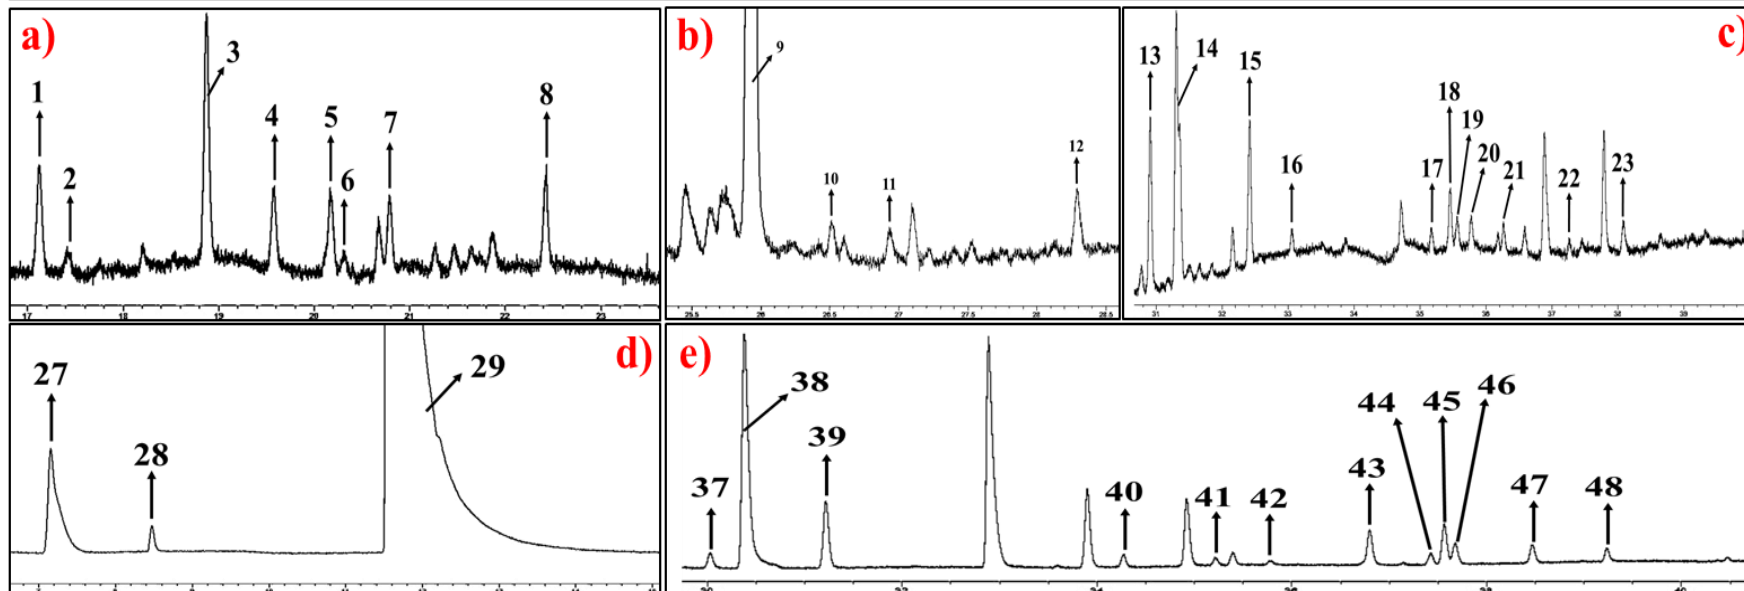

# Petrol evaporative emissions

FID 1/DB-1 column

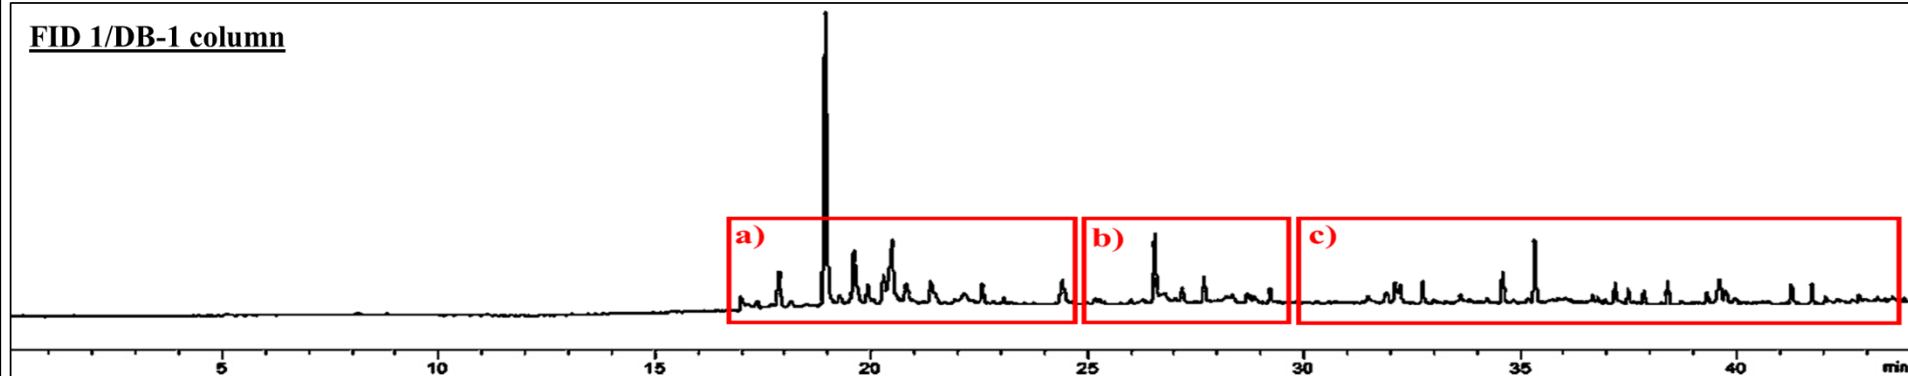

FID 2/Alumina Plot column

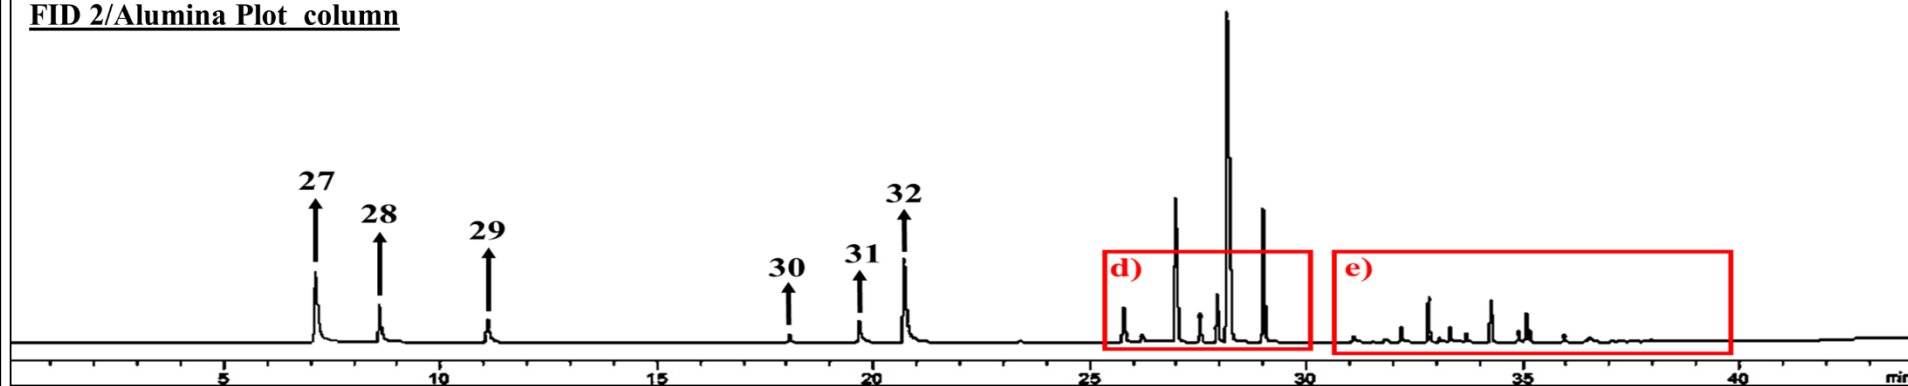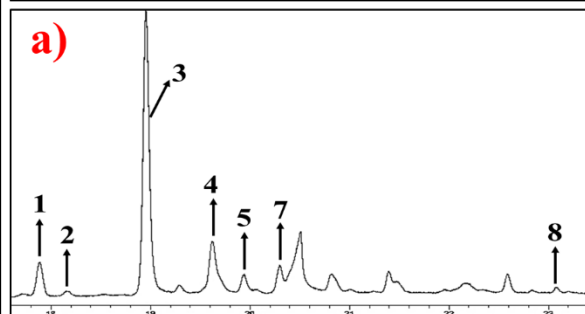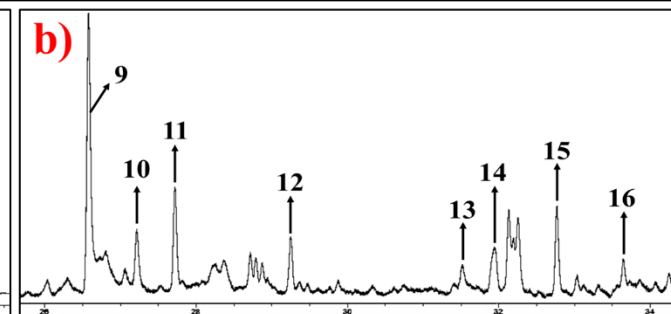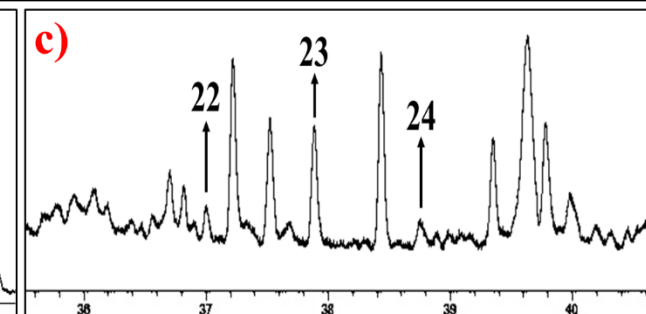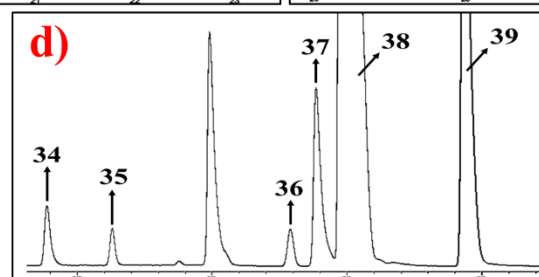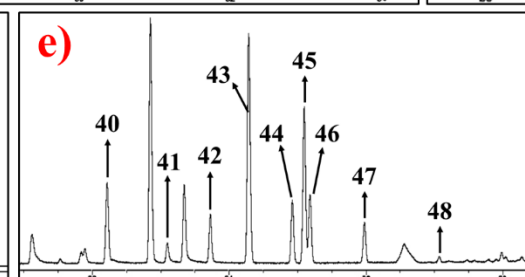

# Diesel evaporative emissions

FID 1/DB-1 column

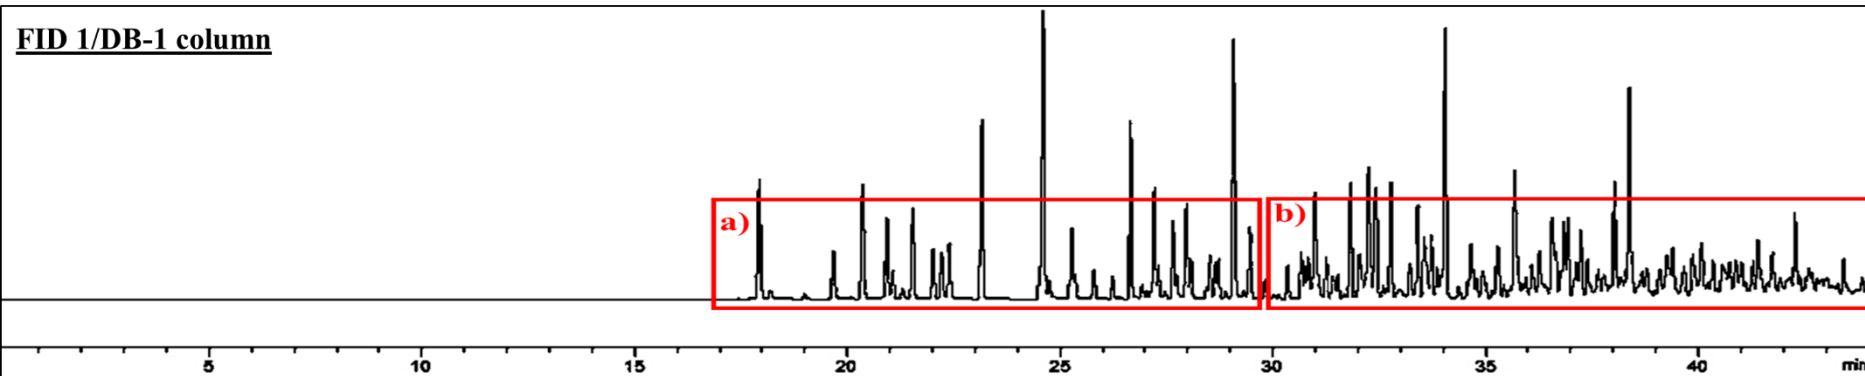

FID 2/Alumina Plot column

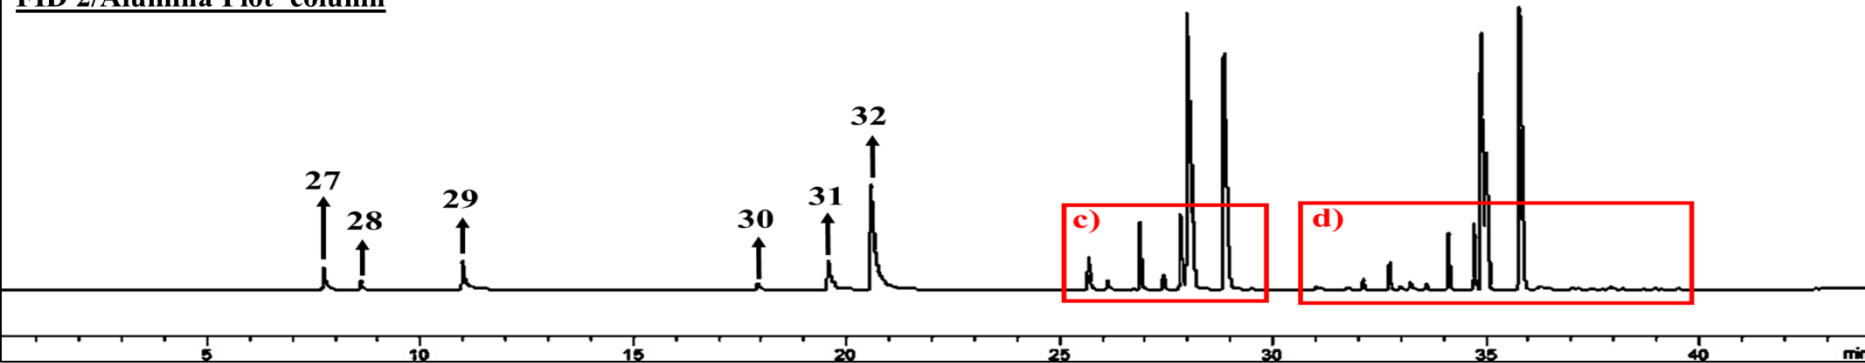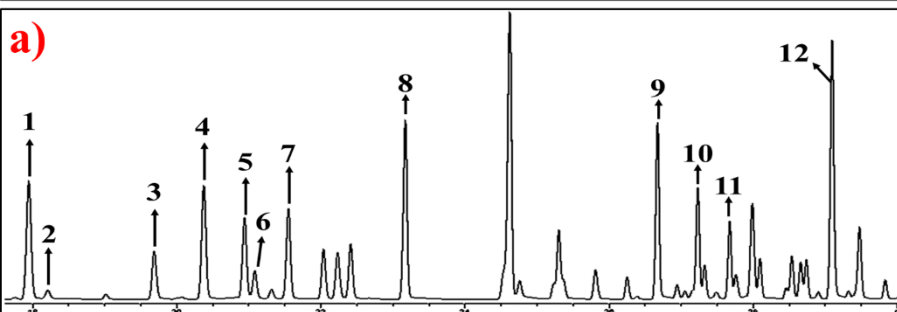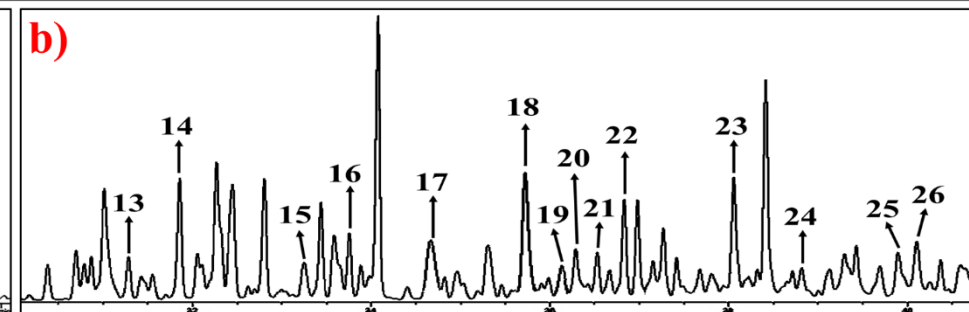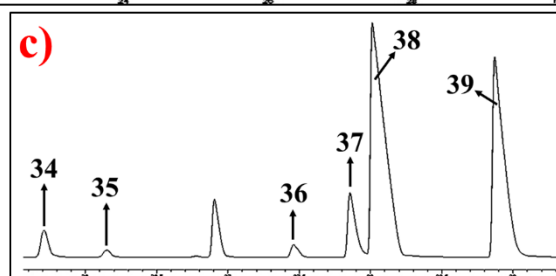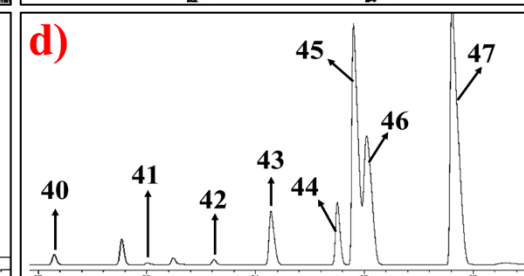

Supplement: Supplementary file 1 [file acp-20-12133-2020-supplement.zip › Supplementaryfile2examplechromatograms.pdf]
