# Supplementary material for: Non-methane hydrocarbon (NMHC) fingerprints of major urban and agricultural emission sources for use in source apportionment studies
Source: Copernicus journal article supplement (doi:10.5194/acp-20-12133-2020), 2020-10-26
Supplement: Supplementary file 1 [file acp-20-12133-2020-supplement.zip]

Archive with 4 entries (4 files):
- Supplementaryfile1.pdf
- acp-20-12133-2020-supplement-title-page.pdf
- Supplementaryfile3mixingratiossamples.xlsx
- Supplementaryfile2examplechromatograms.pdf
