# Supplementary material for: Non-methane hydrocarbon (NMHC) fingerprints of major urban and agricultural emission sources for use in source apportionment studies
Source: Copernicus journal article supplement (doi:10.5194/acp-20-12133-2020), 2020-10-26
Supplement: Supplementary file 1 [file acp-20-12133-2020-supplement.zip › acp-20-12133-2020-supplement-title-page.pdf]

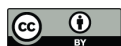

## *Supplement of*

# **Non-methane hydrocarbon (NMHC) fingerprints of major urban and agricultural emission sources for use in source apportionment studies**

**Ashish Kumar et al.**

*Correspondence to:* Vinayak Sinha ([vsinha@iisermohali.ac.in](mailto:vsinha@iisermohali.ac.in))

- [acp-20-12133-2020-supplement-title-page.pdf](#)
- [Supplementaryfile1.pdf](#)
- [Supplementaryfile2examplechromatograms.pdf](#)
- [Supplementaryfile3mixingratioexamples.xlsx](#)

The copyright of individual parts of the supplement might differ from the CC BY 4.0 License.
