# Supplementary material for: Non-methane hydrocarbon (NMHC) fingerprints of major urban and agricultural emission sources for use in source apportionment studies
Source: Copernicus journal article supplement (doi:10.5194/acp-20-12133-2020), 2020-10-26
Supplement: Supplementary file 1 [file acp-20-12133-2020-supplement.zip › Supplementaryfile1.pdf]

## Supplementary information to:

### **Non methane hydrocarbon (NMHC) fingerprints of major urban and agricultural emission sources for use in source apportionment studies**

Ashish Kumar<sup>1</sup>, Vinayak Sinha<sup>1\*</sup>, Muhammed Shabin<sup>1</sup>, Haseeb Hakkim<sup>1</sup>, Bernard Bonsang<sup>2</sup> and Valerie Gros<sup>2</sup>

<sup>1</sup> Department of Earth and Environmental Sciences, Indian Institute of Science Education and Research Mohali, Sector 81, S.A.S Nagar, Manauli PO, Punjab, 140306, India.

<sup>2</sup> LSCE, Laboratoire des Sciences du Climat et de l'Environnement, CNRS-CEA-UVSQ, IPSL, Université Paris Saclay, Orme des Merisiers, F91191 Gif-sur-Yvette, France.

*Correspondence to:* Dr. Vinayak Sinha ([vsinha@iisermohali.ac.in](mailto:vsinha@iisermohali.ac.in))

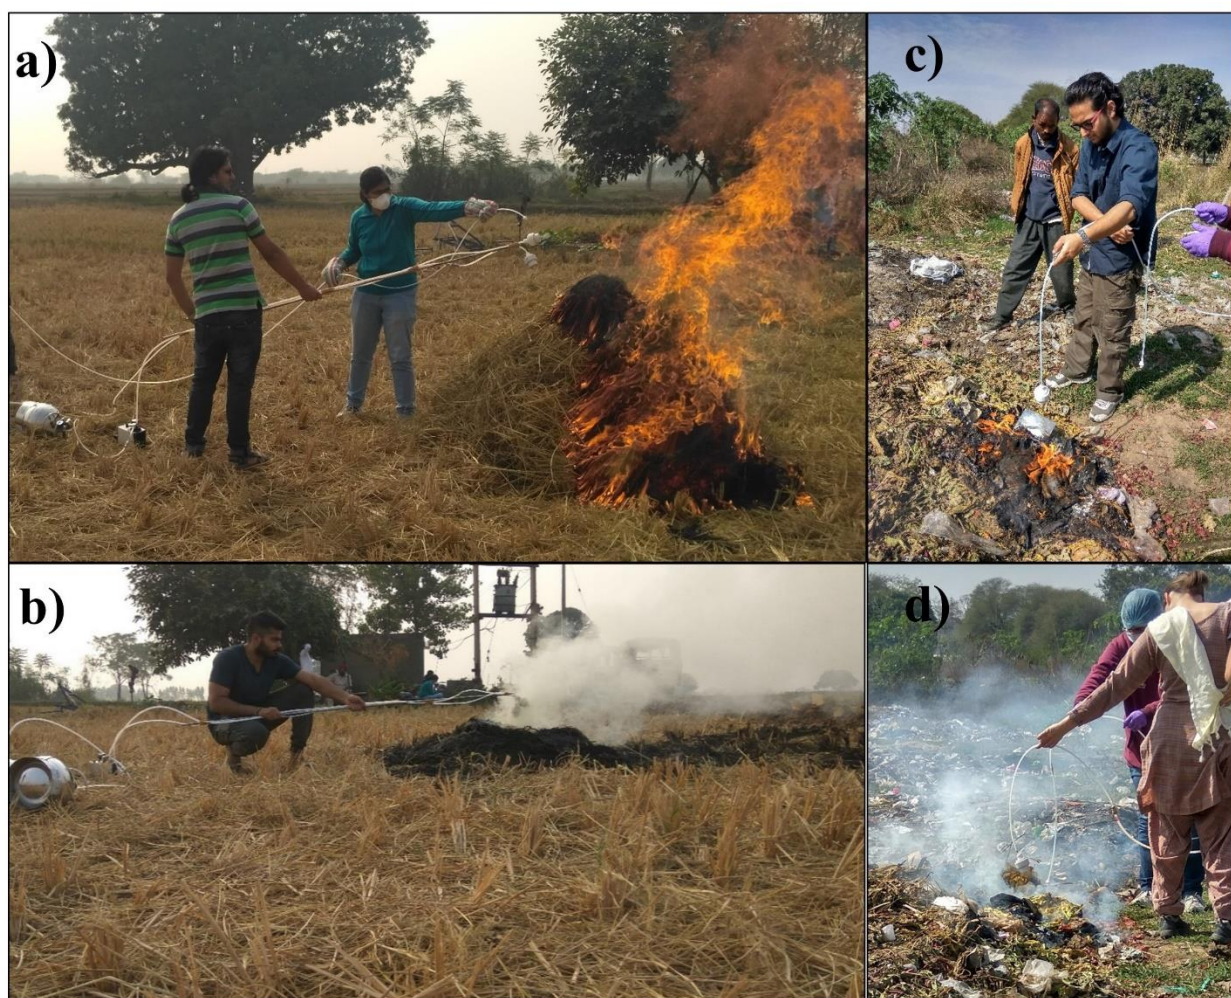

**Figure S1:** Whole air sample collection from **a)** paddy stubble fire: flaming; **b)** paddy stubble fire: smouldering; **c)** garbage fire: flaming; and **d)** garbage fire: smouldering. The flaming and smouldering fires were distinguished based upon the presence of flame and white smoke as per past experiences (Chandra et al 2017, Kumar et al., 2018).

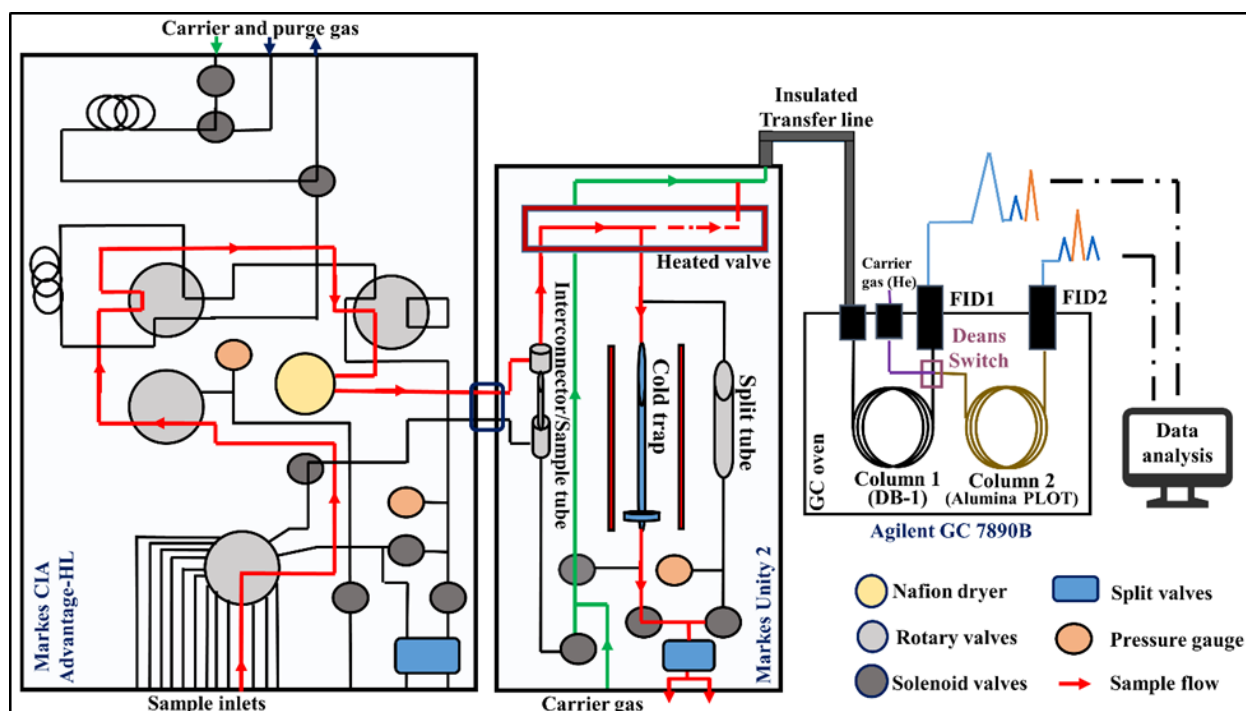

**Figure S2:** Schematic representation of the TD-GC-FID instrument during a typical sample injection and chromatographic run.

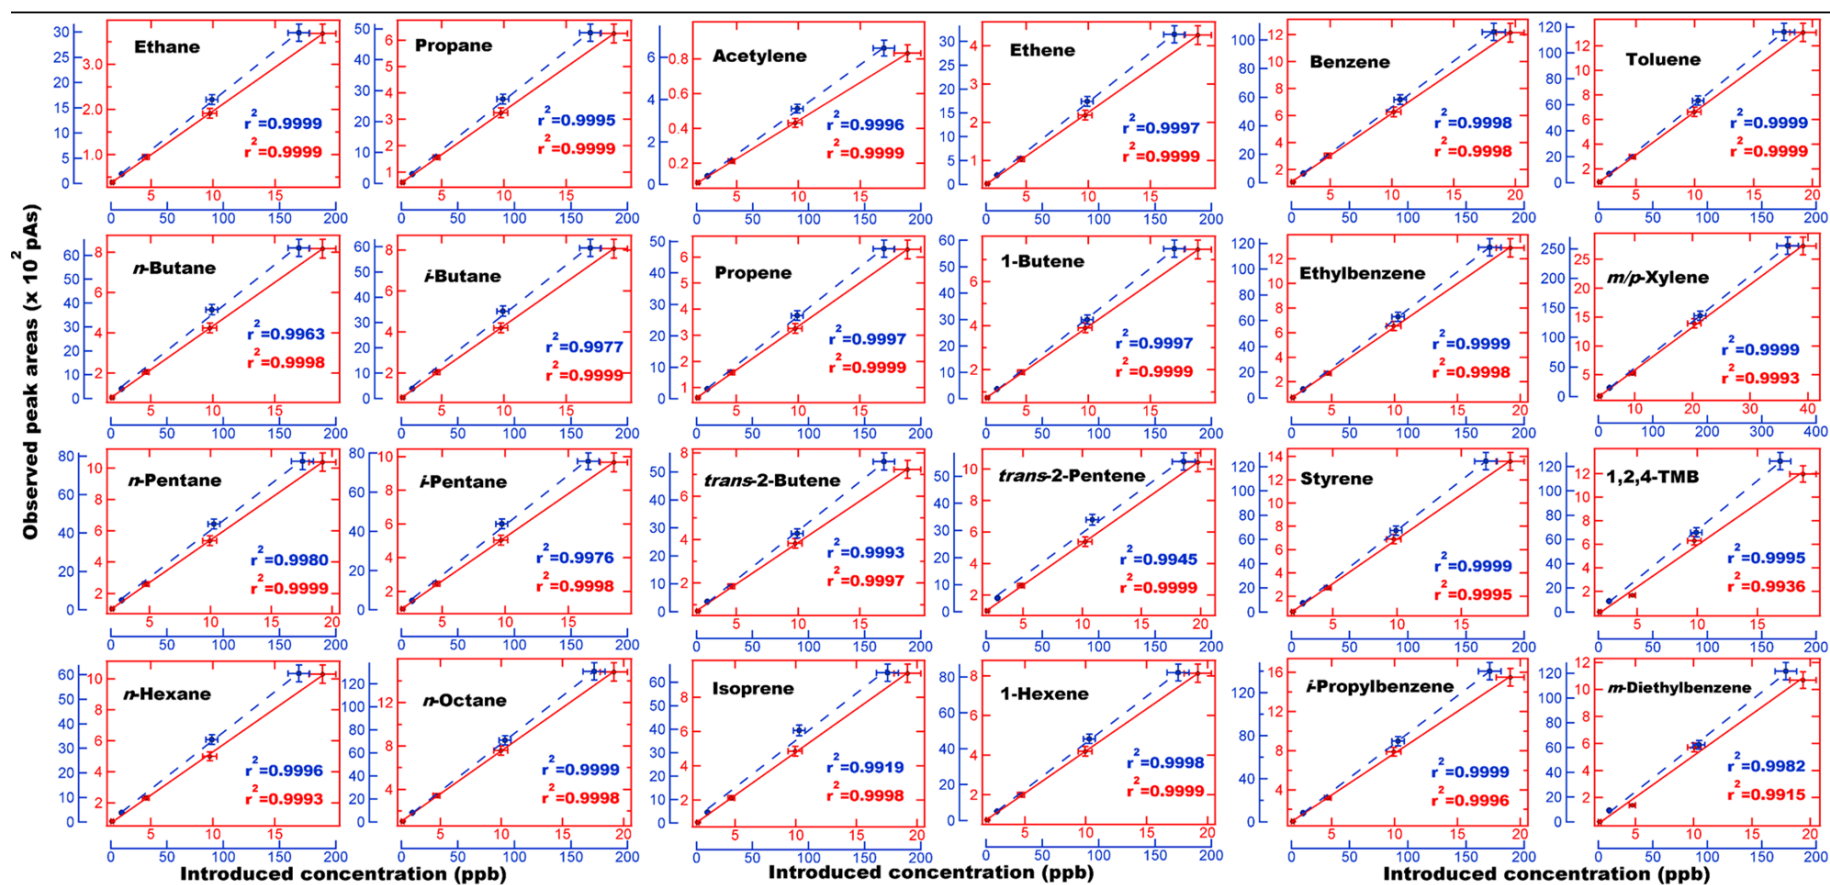

**Figure S3:** Sensitivity and linearity ( $r^2 > 0.99$ ) of NMHCs obtained from the calibration experiments performed over a dynamic range of two order of magnitude between 2-200ppb over two sets of calibrations: regular calibration of 2-20 ppb and a high mixing ratio calibration of 10-200ppb. The calibrations were performed via dynamic dilution with zero air using a standard gas calibration unit (GCU-s v2.1, Ionimed Analytik, Innsbruck, Austria). The horizontal error bars represent the root mean square propagation of errors due to 5 % uncertainty in the VOC standard and 2% error for each of the two mass flow controllers used for calibration. The vertical error bars represent the uncertainty in instrumental measurements while sampling the standard gas at each dilution mixing ratio.

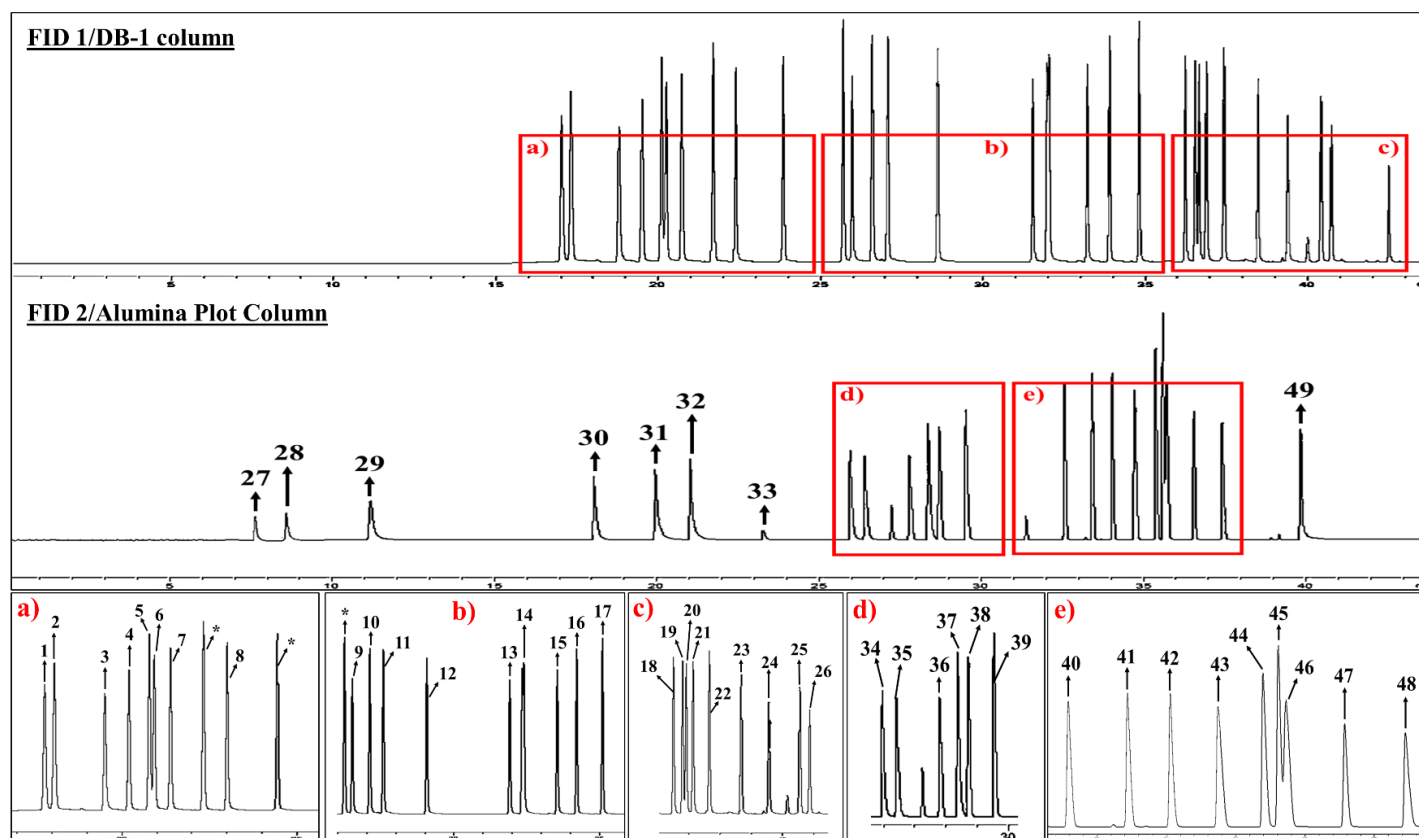

1. Methylcyclopentane, 2. 2,4-Dimethylpentane, 3. Benzene, 4. Cyclohexane, 5. 2-Methylhexane, 6. 2,3-Dimethylpentane, 7. 2-Methylhexane, 8. *n*-Heptane, 9. Toluene, 10. 2-Methylheptane, 11. 3-Methylheptane, 12. *n*-Octane, 13. Ethylbenzene, 14. *m/p*-Xylene, 15. Styrene, 16. *o*-Xylene, 17. *i*-Propylbenzene, 18. *n*-Propylbenzene, 19. *m*-Ethyltoluene, 20. *p*-Ethyltoluene, 21. 1,3,5-Trimethylbenzene, 22. *o*-Ethyltoluene, 23. 1,2,4-Trimethylbenzene, 24. 1,2,3-Trimethylbenzene, 25. *m*-Diethylbenzene, 26. *p*-Diethylbenzene, 27. Ethane, 28. Ethene, 29. Propane, 30. Propene, 31. *i*-Butane, 32. *n*-Butane, 33. Acetylene, 34. *trans*-2-Butene, 35. 1-Butene, 36. *cis*-2-Butene, 37. Cyclopentane, 38. *i*-Pentane, 39. *n*-Pentane, 40. *trans*-2-Pentene, 41. 1-Pentene, 42. *cis*-2-Pentene, 43. 2,2-Dimethylbutane, 44. 2,3-Dimethylbutane, 45. 2-Methylpentane, 46. 3-Methylpentane, 47. *n*-Hexane, 48. Isoprene, 49. 1-Hexene.

**Figure S4:** A typical chromatogram showing all the target compounds measured during a standard gas calibration experiment using VOC gas standard 1 (Chemtron Science Laboratories Pvt. Ltd., Navi Mumbai, India). NMHCs (2,2,4-trimethylpentane, 2,3,4-trimethylpentane and methylcyclohexane) which were well resolved and separated in calibration chromatograms but poorly resolved in the analysis of some point source samples are highlighted as (\*) and were excluded from this study.

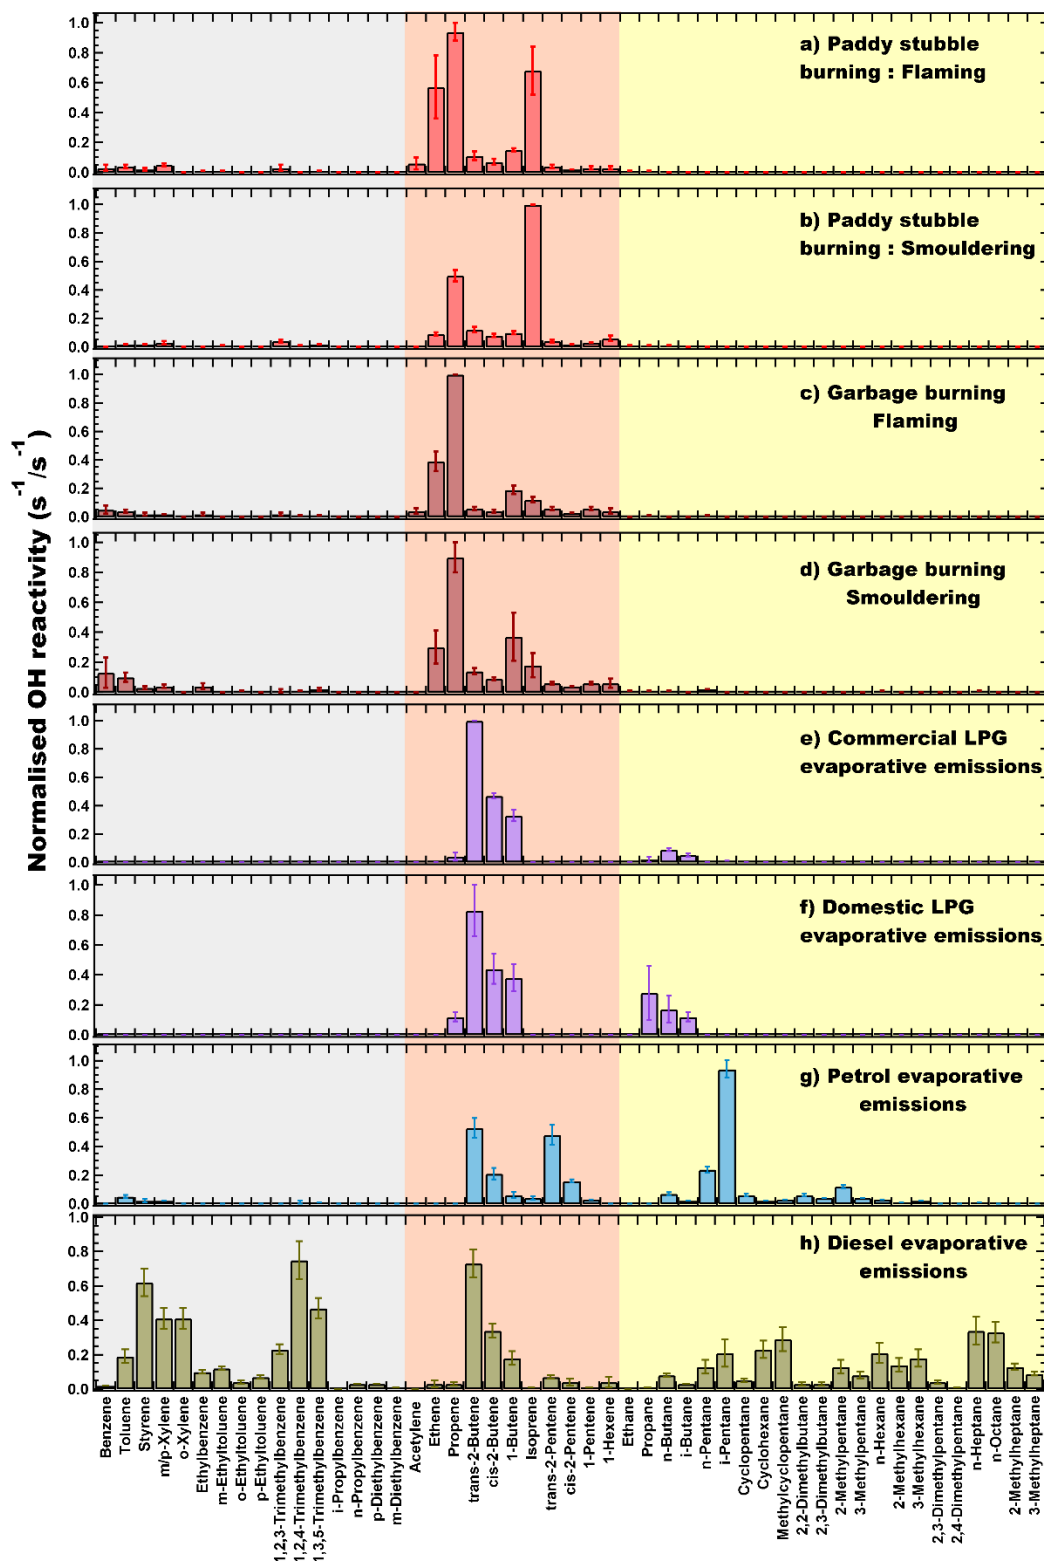

**Figure S5:** Normalised profiles of calculated OH reactivity ( $s^{-1}$ ) in **a)** Paddy stubble burning: Flaming; **b)** Paddy stubble burning: Smouldering; **c)** Garbage burning: Flaming; **d)** Garbage

burning: Smouldering; **e)** Commercial LPG evaporative emissions; **f)** Domestic LPG evaporative emissions; **g)** Petrol evaporative emissions; **h)** Diesel evaporative emissions. The grey colour highlights the aromatics, red colour highlights the alkenes and alkyne and the yellow colour highlights the alkanes. The OH reactivity of the NMHCs are normalised to the NMHC with the maximum OH reactivity in the respective source sample as:

$$f = [Y_i]/[Y_{\max}]$$

Where,  $[Y_i]$  is the NMHC OH reactivity and  $[Y_{\max}]$  is the NMHC with the maximum OH reactivity in the respective source sample. Error bars represent the standard error of averaged Normalised ratio.

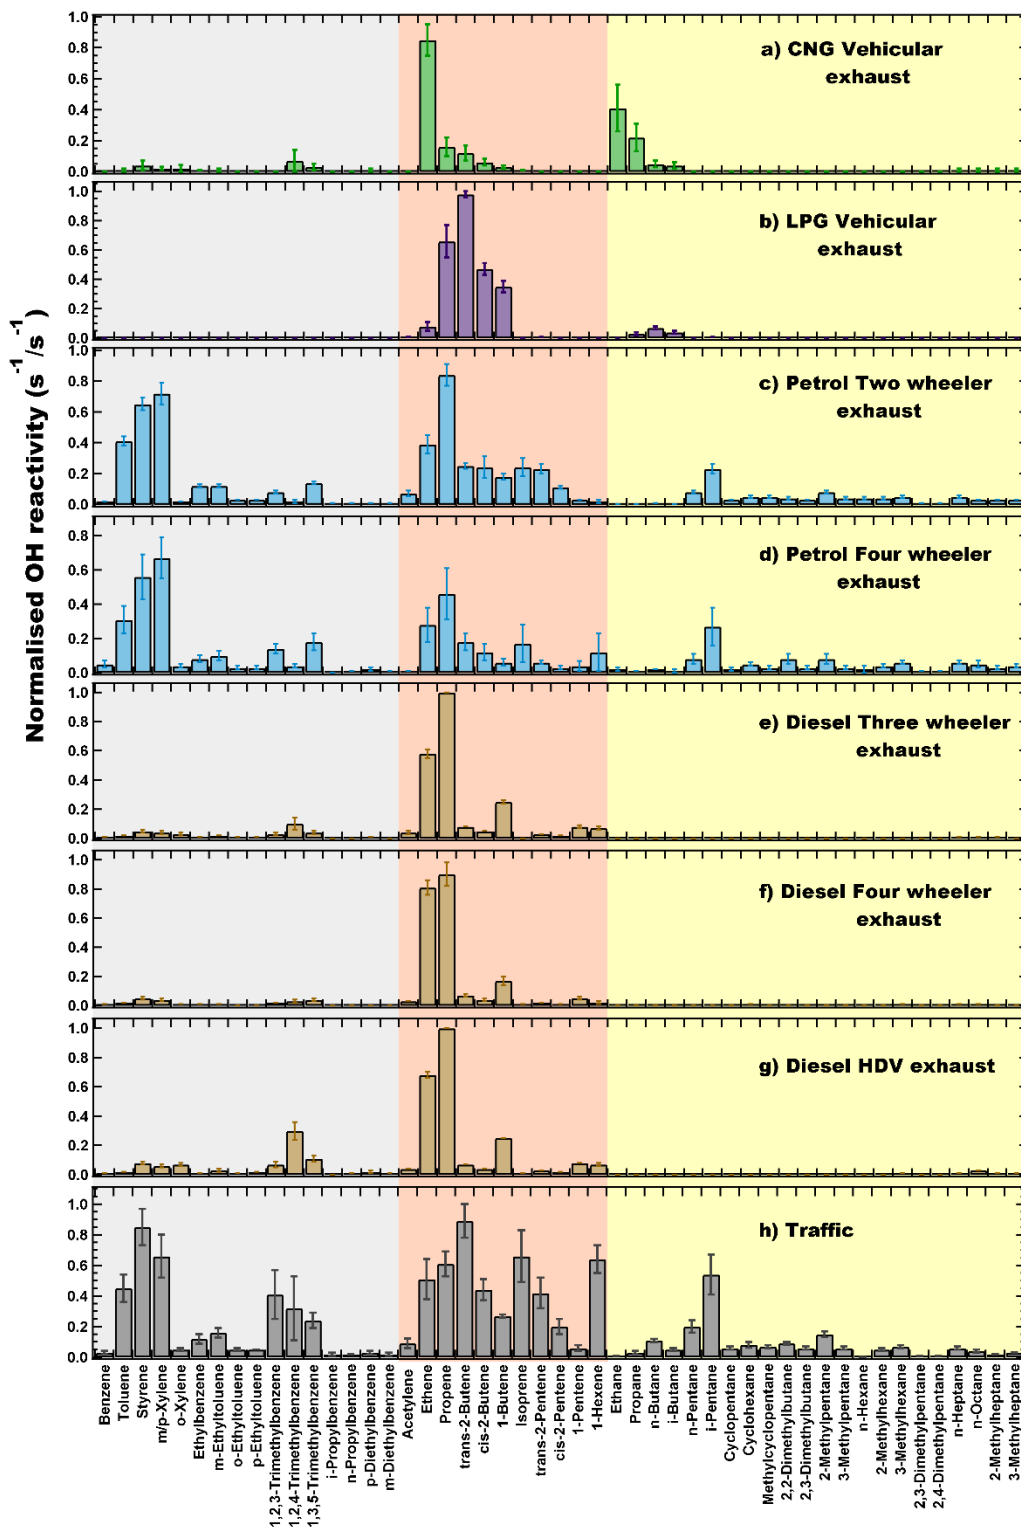

**Figure S6:** Normalised profiles of calculated OH reactivity ( $\text{s}^{-1}$ ) in **a)** CNG vehicular exhaust; **b)** LPG vehicular exhaust; **c)** Petrol two wheeler exhaust; **d)** Petrol four wheeler exhaust; **e)** Diesel three wheeler vehicular exhaust; **f)** Diesel four wheeler vehicular exhaust **g)** Diesel heavy duty

vehicle (HDV) exhaust **h)** Traffic, derived from the TD-GC-FID measurements. Error bars represent the standard error of averaged normalised ratio. The grey colour highlights the aromatics, red colour highlights the alkenes and alkyne and the yellow colour highlights the alkanes.

**Table S1.** Parameters for the GC oven temperature ramp program and FIDs (Flame ionisation detectors).

| Parameter                      | Value      |
|--------------------------------|------------|
| Initial temp                   | 30 °C      |
| Initial hold time              | 12 min     |
| Rate 1                         | 5 °C/min   |
| Final temperature 1            | 170 °C     |
| Hold time 1                    | 1 min      |
| Rate 2                         | 15 °C/min  |
| Final temperature 2            | 200 °C     |
| Hold time 2                    | 1 min      |
| Total Run time                 | 44 min     |
| FID Temperature                | 250 °C     |
| FID Air flow                   | 400 mL/min |
| FID H <sub>2</sub> fuel flow   | 40 mL/min  |
| FID N <sub>2</sub> makeup flow | 20 mL/min  |

**Table S2:** Average concentrations (ppb) and standard deviation (in parentheses) of the compounds >50ppb after dilution.

| <b>Petrol 2 Wheelers (n = 14)</b>     |                              | <b>Petrol 4 Wheelers (n = 9)</b>        |                              | <b>Diesel HDVs (n = 15)</b>          |                                  |
|---------------------------------------|------------------------------|-----------------------------------------|------------------------------|--------------------------------------|----------------------------------|
| <b>Compounds</b>                      | <b>diluted concentration</b> | <b>Compounds</b>                        | <b>diluted concentration</b> | <b>Compounds</b>                     | <b>diluted concentration</b>     |
| Toluene                               | 96.3 (45.7)                  | Ethane                                  | 81.8 (62.28)                 | Ethene                               | 150.4 (35.16)                    |
| <i>m/p</i> -Xylene                    | 55.1 (32.2)                  | <i>i</i> -Pentane                       | 72.9 (71.55)                 | Propene                              | 59.5 (14.26)                     |
| Acetylene                             | 95.6 (74.7)                  |                                         |                              |                                      |                                  |
| Ethene                                | 67.5 (48.9)                  |                                         |                              |                                      |                                  |
| <i>i</i> -Pentane                     | 87.2 (56.3)                  |                                         |                              |                                      |                                  |
| Toluene                               | 96.3 (45.8)                  |                                         |                              |                                      |                                  |
| <i>m/p</i> -Xylene                    | 55.1 (32.2)                  |                                         |                              |                                      |                                  |
| <b>Diesel 4 Wheelers (n = 12)</b>     |                              | <b>Diesel 3 Wheelers (n = 7)</b>        |                              | <b>LPG Vehicles (n = 9)</b>          |                                  |
| Acetylene                             | 58.9 (37.9)                  | Acetylene                               | 51.7 (25.5)                  | Propene                              | 107.5 (75.6)                     |
| Ethene                                | 164.6 (27.2)                 | Ethene                                  | 78.1 (18.3)                  | <i>trans</i> -2-Butene               | 71.8 (35.2)                      |
| Propene                               | 53.2 (21.8)                  |                                         |                              | 1-Butene                             | 55.2 (40.8)                      |
|                                       |                              |                                         |                              | Propane                              | 105.5 (57.6)                     |
|                                       |                              |                                         |                              | <i>n</i> -Butane                     | 132.8 (43.0)                     |
|                                       |                              |                                         |                              | <i>i</i> -Butane                     | 93.6 (37.7)                      |
|                                       |                              |                                         |                              | Propene                              | 107.5 (75.6)                     |
| <b>CNG Vehicles (n=7)</b>             |                              | <b>Paddy fires Flaming (n=3)</b>        |                              | <b>Paddy fires Smouldering (n=3)</b> |                                  |
| Ethane                                | 166.1 (17.8)                 | Ethene                                  | 65.4 (23.5)                  | Ethane                               | 132.6 (97.67)                    |
| <b>Garbage fires Flaming (n=5)</b>    |                              | <b>Garbage fires Smouldering (n=5)</b>  |                              | <b>Traffic (n=3)</b>                 |                                  |
| Acetylene                             | 76.9 (56.6)                  | Ethane                                  | 59.2 (65.8)                  | None                                 |                                  |
| Ethene                                | 83.8 (54.7)                  |                                         |                              |                                      |                                  |
| Propene                               | 61.2 (35.3)                  |                                         |                              |                                      |                                  |
| <b>Domestic LPG evaporative (n=5)</b> |                              | <b>Commercial LPG evaporative (n=5)</b> |                              | <b>Petrol evaporative (n=10)</b>     | <b>Diesel evaporative (n=10)</b> |
| Propane                               | 147.4 (48.7)                 | <i>trans</i> -2-Butene                  | 52.5 (20.6)                  | None                                 | None                             |
| <i>n</i> -Butane                      | 55.1 (22.5)                  | <i>n</i> -Butane                        | 127.9 (38.9)                 |                                      |                                  |
| <i>i</i> -Butane                      | 53.6 (21.2)                  | <i>i</i> -Butane                        | 62.6 (22.4)                  |                                      |                                  |

**Table S3:** Details of VOC gas standards used in calibration experiments. Mixing ratios reported here are in ppm.

VOC Standard 1: Chemtron Science Laboratories Pvt. Ltd., Navi Mumbai, India.

VOC Standard 2: Apel Riemer Environmental. Inc., Colorado, USA.

| Compounds               | Mixing ratios<br>in VOC<br>Standard 1 | Mixing ratios<br>in VOC<br>Standard 2 | Compounds                | Mixing ratios<br>in VOC<br>Standard 1 | Mixing ratios<br>in VOC<br>Standard 2 |
|-------------------------|---------------------------------------|---------------------------------------|--------------------------|---------------------------------------|---------------------------------------|
| <b>Aromatics (n=16)</b> |                                       |                                       |                          |                                       |                                       |
| Benzene                 | 1.03                                  | 0.49                                  | <i>p</i> -Ethyltoluene   | 1.01                                  |                                       |
| Toluene                 | 1.01                                  | 0.47                                  | 1,2,3-Trimethylbenzene   | 1.01                                  |                                       |
| Styrene                 | 0.99                                  |                                       | 1,2,4-Trimethylbenzene   | 0.99                                  |                                       |
| <i>m/p</i> -Xylene      | 2.06                                  |                                       | 1,3,5-Trimethylbenzene   | 1.03                                  |                                       |
| <i>o</i> -Xylene        | 1.01                                  |                                       | <i>i</i> -Propylbenzene  | 1.01                                  |                                       |
| Ethylbenzene            | 1.01                                  |                                       | <i>n</i> -Propylbenzene  | 0.99                                  |                                       |
| <i>m</i> -Ethyltoluene  | 1.01                                  |                                       | <i>m</i> -Diethylbenzene | 1.02                                  |                                       |
| <i>o</i> -Ethyltoluene  | 1.03                                  |                                       | <i>p</i> -Diethylbenzene | 1.01                                  |                                       |
| <b>Alkyne (n=1)</b>     |                                       |                                       |                          |                                       |                                       |
| Acetylene               | 0.99                                  |                                       |                          |                                       |                                       |
| <b>Alkenes (n=10)</b>   |                                       |                                       |                          |                                       |                                       |
| Ethene                  | 0.99                                  |                                       | Isoprene                 | 1.01                                  | 0.48                                  |
| Propene                 | 0.99                                  |                                       | 1-Pentene                | 1.00                                  |                                       |
| 1-Butene                | 0.99                                  |                                       | <i>trans</i> -2-Pentene  | 1.04                                  |                                       |
| <i>trans</i> -2-Butene  | 0.99                                  |                                       | <i>cis</i> -2-Pentene    | 1.01                                  |                                       |
| <i>cis</i> -2-Butene    | 0.99                                  |                                       | 1-Hexene                 | 1.01                                  |                                       |
| <b>Alkanes (n=22)</b>   |                                       |                                       |                          |                                       |                                       |
| Ethane                  | 0.99                                  |                                       | <i>n</i> -Hexane         | 0.99                                  |                                       |
| Propane                 | 0.99                                  |                                       | 2-Methylpentane          | 0.99                                  |                                       |
| <i>n</i> -Butane        | 0.99                                  |                                       | 3-Methylpentane          | 0.99                                  |                                       |
| <i>i</i> -Butane        | 0.99                                  |                                       | 2-Methylhexane           | 1.01                                  |                                       |
| <i>i</i> -Pentane       | 0.98                                  |                                       | 3-Methylhexane           | 0.99                                  |                                       |
| <i>n</i> -Pentane       | 1.01                                  |                                       | 2,3-Dimethylpentane      | 1.01                                  |                                       |
| Cyclopentane            | 1.04                                  |                                       | 2,4-Dimethylpentane      | 1.01                                  |                                       |
| Cyclohexane             | 1.01                                  |                                       | <i>n</i> -Heptane        | 1.03                                  |                                       |
| Methylcyclopentane      | 1.01                                  |                                       | <i>n</i> -Octane         | 1.01                                  |                                       |
| 2,2-Dimethylbutane      | 1.01                                  |                                       | 2-Methylheptane          | 1.03                                  |                                       |
| 2,3-Dimethylbutane      | 0.99                                  |                                       | 3-Methylheptane          | 1.03                                  |                                       |

**Table S4:** Average sensitivity factors (pAs/ppb) and standard deviation (pAs/ppb) for 49 NMHCs obtained from thirteen calibration experiments performed between December 2016 and October 2018 using the calibration standard 1 (Chemtron Science Laboratories Pvt. Ltd., Navi Mumbai, India).

5

| Compounds               | Average sensitivity (pAs/ppb) | Standard deviation (pAs/ppb) | Compounds                | Average sensitivity (pAs/ppb) | Standard deviation (pAs/ppb) |
|-------------------------|-------------------------------|------------------------------|--------------------------|-------------------------------|------------------------------|
| <b>Aromatics (n=16)</b> |                               |                              |                          |                               |                              |
| Benzene                 | 67.8                          | 5.6                          | <i>p</i> -Ethyltoluene   | 79.3                          | 9.6                          |
| Toluene                 | 74.6                          | 6.6                          | 1,2,3-Trimethylbenzene   | 58.7                          | 8.0                          |
| Styrene                 | 81.2                          | 8.2                          | 1,2,4-Trimethylbenzene   | 78.8                          | 10.6                         |
| <i>m/p</i> -Xylene      | 79.8                          | 8.3                          | 1,3,5-Trimethylbenzene   | 76.6                          | 9.3                          |
| <i>o</i> -Xylene        | 91.8                          | 9.6                          | <i>i</i> -Propylbenzene  | 90.5                          | 9.2                          |
| Ethylbenzene            | 74.8                          | 7.3                          | <i>n</i> -Propylbenzene  | 85.0                          | 9.4                          |
| <i>m</i> -Ethyltoluene  | 79.2                          | 9.3                          | <i>m</i> -Diethylbenzene | 68.6                          | 9.7                          |
| <i>o</i> -Ethyltoluene  | 80.1                          | 9.5                          | <i>p</i> -Diethylbenzene | 63.5                          | 10.0                         |
| <b>Alkyne (n=1)</b>     |                               |                              |                          |                               |                              |
| Acetylene               | 5.2                           | 0.9                          |                          |                               |                              |
| <b>Alkenes (n=10)</b>   |                               |                              |                          |                               |                              |
| Ethene                  | 24.8                          | 2.6                          | Isoprene                 | 53.2                          | 4.9                          |
| Propene                 | 35.8                          | 3.4                          | 1-Pentene                | 57.8                          | 5.1                          |
| 1-Butene                | 41.4                          | 5.1                          | <i>trans</i> -2-Pentene  | 56.6                          | 5.3                          |
| <i>trans</i> -2-Butene  | 40.1                          | 5.0                          | <i>cis</i> -2-Pentene    | 56.4                          | 5.3                          |
| <i>cis</i> -2-Butene    | 40.3                          | 4.8                          | 1-Hexene                 | 45.9                          | 4.1                          |
| <b>Alkanes (n=22)</b>   |                               |                              |                          |                               |                              |
| Ethane                  | 20.7                          | 1.9                          | <i>n</i> -Hexane         | 62.4                          | 6.1                          |
| Propane                 | 35.9                          | 3.2                          | 2-Methylpentane          | 73.5                          | 7.1                          |
| <i>n</i> -Butane        | 46.4                          | 4.5                          | 3-Methylpentane          | 81.4                          | 7.7                          |
| <i>i</i> -Butane        | 45.3                          | 4.4                          | 2-Methylhexane           | 86.5                          | 7.3                          |
| <i>i</i> -Pentane       | 56.4                          | 5.4                          | 3-Methylhexane           | 78.8                          | 6.8                          |
| <i>n</i> -Pentane       | 58.4                          | 5.5                          | 2,3-Dimethylpentane      | 74.4                          | 6.8                          |
| Cyclopentane            | 51.5                          | 4.5                          | 2,4-Dimethylpentane      | 79.2                          | 6.6                          |
| Cyclohexane             | 71.0                          | 5.5                          | <i>n</i> -Heptane        | 77.3                          | 6.9                          |
| Methylcyclopentane      | 68.9                          | 5.6                          | <i>n</i> -Octane         | 86.1                          | 8.5                          |
| 2,2-Dimethylbutane      | 70.6                          | 6.6                          | 2-Methylheptane          | 85.7                          | 7.4                          |
| 2,3-Dimethylbutane      | 70.9                          | 6.7                          | 3-Methylheptane          | 86.3                          | 8.2                          |

**Table S5:** Summary of Tukey pairwise HSD (honestly significant difference) test results performed for the averaged OFP values from the different emission sources. The significant differences in the mean values at confidence interval > 95% are ascertained by p (same mean) < 0.05 and are highlighted in bold.

|                     | Diesel vehicles | Paddy smouldering | Paddy flaming | LPG vehicles | Garbage flaming             | Garbage smouldering         | Petrol vehicles             | LPG evaporative             | Diesel evaporative          | Petrol evaporative          | CNG vehicles                |
|---------------------|-----------------|-------------------|---------------|--------------|-----------------------------|-----------------------------|-----------------------------|-----------------------------|-----------------------------|-----------------------------|-----------------------------|
| Diesel vehicles     | -               | -                 | $\sigma$      | -            | <b>2<math>\sigma</math></b> | <b>3<math>\sigma</math></b> | <b>4<math>\sigma</math></b> | <b>4<math>\sigma</math></b> | <b>4<math>\sigma</math></b> | <b>4<math>\sigma</math></b> | <b>4<math>\sigma</math></b> |
| Paddy smouldering   |                 | -                 | -             | -            | -                           | $\sigma$                    | <b>2<math>\sigma</math></b> | <b>2<math>\sigma</math></b> | <b>4<math>\sigma</math></b> | <b>4<math>\sigma</math></b> | <b>4<math>\sigma</math></b> |
| Paddy flaming       |                 |                   | -             | -            | -                           | -                           | $\sigma$                    | -                           | <b>2<math>\sigma</math></b> | <b>4<math>\sigma</math></b> | <b>4<math>\sigma</math></b> |
| LPG vehicles        |                 |                   |               | -            | -                           | $\sigma$                    | <b>2<math>\sigma</math></b> | <b>2<math>\sigma</math></b> | <b>3<math>\sigma</math></b> | <b>4<math>\sigma</math></b> | <b>4<math>\sigma</math></b> |
| Garbage flaming     |                 |                   |               |              | -                           | -                           | -                           | -                           | $\sigma$                    | <b>4<math>\sigma</math></b> | <b>4<math>\sigma</math></b> |
| Garbage smouldering |                 |                   |               |              |                             | -                           | -                           | -                           | -                           | <b>4<math>\sigma</math></b> | <b>4<math>\sigma</math></b> |
| Petrol vehicles     |                 |                   |               |              |                             |                             | -                           | -                           | -                           | <b>2<math>\sigma</math></b> | <b>4<math>\sigma</math></b> |
| LPG evaporative     |                 |                   |               |              |                             |                             |                             | -                           | -                           | -                           | <b>4<math>\sigma</math></b> |
| Diesel evaporative  |                 |                   |               |              |                             |                             |                             |                             | -                           | $\sigma$                    | <b>3<math>\sigma</math></b> |
| Petrol evaporative  |                 |                   |               |              |                             |                             |                             |                             |                             | -                           | -                           |
| CNG vehicles        |                 |                   |               |              |                             |                             |                             |                             |                             |                             | -                           |

**Table S6:** Summary of Tukey pairwise HSD (honestly significant difference) test results performed for the averaged BTEX% from the different emission sources. The significant differences in the mean values at confidence interval > 95% are ascertained by p (same mean) < 0.05 and are highlighted in bold.

|                     | Petrol vehicles | Garbage smouldering | Garbage flaming | Paddy flaming               | Diesel vehicles             | Paddy smouldering           | Diesel evaporative          | Petrol evaporative          |
|---------------------|-----------------|---------------------|-----------------|-----------------------------|-----------------------------|-----------------------------|-----------------------------|-----------------------------|
| Petrol vehicles     | -               | -                   | -               | -                           | <b>2<math>\sigma</math></b> | <b>4<math>\sigma</math></b> | <b>2<math>\sigma</math></b> | <b>4<math>\sigma</math></b> |
| Garbage smouldering |                 | -                   | -               | <b>2<math>\sigma</math></b> | <b>4<math>\sigma</math></b> | <b>4<math>\sigma</math></b> | <b>4<math>\sigma</math></b> | <b>4<math>\sigma</math></b> |
| Garbage flaming     |                 |                     | -               | -                           | <b>2<math>\sigma</math></b> | <b>3<math>\sigma</math></b> | $\sigma$                    | <b>4<math>\sigma</math></b> |
| Paddy flaming       |                 |                     |                 | -                           | -                           | $\sigma$                    | -                           | <b>4<math>\sigma</math></b> |
| Diesel vehicles     |                 |                     |                 |                             | -                           | -                           | -                           | $\sigma$                    |
| Paddy smouldering   |                 |                     |                 |                             |                             | -                           | -                           | -                           |
| Diesel evaporative  |                 |                     |                 |                             |                             |                             | -                           | <b>2<math>\sigma</math></b> |
| Petrol evaporative  |                 |                     |                 |                             |                             |                             |                             | -                           |
