# Supplementary material for: Non-methane hydrocarbon (NMHC) fingerprints of major urban and agricultural emission sources for use in source apportionment studies
Source: Copernicus journal article supplement (doi:10.5194/acp-20-12133-2020), 2020-10-26
Supplement: Supplementary file 1 [file acp-20-12133-2020-supplement.zip › Supplementaryfile3mixingratiossamples.xlsx]

## Sheet: Garbage burning
Compounds		Diluted mixing ratios (ppb)												Actual sample mixing ratios (ppb)
		Flaming						Smouldering						Flaming											Smouldering											Ambient background mixing ratios (ppb)
														Flaming 1		Flaming 2		Flaming 3		Flaming 4		Flaming 5			Smouldering 1		Smouldering 2		Smouldering 3		Smouldering 4		Smouldering 5			Background 1 for sample 1		Background 2 for sample 2		Background 3 for sample 3		Background 4 for sample 4		Background 5 for sample 5
		Flaming 1	Flaming 2	Flaming 3	Flaming 4	Flaming 5		Smouldering 1	Smouldering 2	Smouldering 3	Smouldering 4	Smouldering 5		mixing ratio	uncertainty	mixing ratio	uncertainty	mixing ratio	uncertainty	mixing ratio	uncertainty	mixing ratio	uncertainty		mixing ratio	uncertainty	mixing ratio	uncertainty	mixing ratio	uncertainty	mixing ratio	uncertainty	mixing ratio	uncertainty		mixing ratio	uncertainty	mixing ratio	uncertainty	mixing ratio	uncertainty	mixing ratio	uncertainty	mixing ratio	uncertainty
Benzene		63.0915	42.0163	18.2344	55.1318	31.1328		159.117	17.5878	15.5522	25.7537	26.8426		687.208	39.5879	454.453	26.142	196.464	11.3016	1514.34	87.1106	336.718	19.3695		16742.1	963.125	939.521	54.045	1630.02	93.7652	841.231	48.391	5577.47	320.838		0.98957	0.0569239	1.04027	0.0598406	1.2672	0.0728941	1.60965	0.0925936	1.3479	0.0775367
Toluene		5.80886	11.8759	9.08172	10.4739	8.53508		11.8786	16.5286	10.6192	10.9818	22.5627		60.3153	3.60939	127.049	7.41541	95.977	5.60334	286.274	16.7077	90.3037	5.27175		1247	72.8655	883.837	51.5824	1110.49	64.8101	357.75	20.8791	4694.86	274		1.51149	0.088213	1.66123	0.0969522	2.53722	0.148076	1.54839	0.0903665	2.13661	0.124696
Styrene		0.0932449	1.75999	0.486953	1.26562	0.833925		0.296026	0.108762	0.471633	0.434585	3.03438		0.552435	0.0566484	18.7965	1.29817	4.70487	0.326022	34.8036	2.40345	8.97522	0.619839		30.9356	2.15255	5.56405	0.384682	46.6612	3.22242	14.2357	0.983082	632.577	43.6842		0.233837	0.0161482	0.267204	0.0184524	0.390255	0.02695	0.0322986	0.00223046	0.0921421	0.0063631
m/p-Xylene		0.108139	3.26772	1.45788	2.3585	2.28602		0.589717	1.03011	1.31363	3.76999	5.20389		0	0.0597968	34.3819	2.41808	14.3151	1.00915	63.4319	4.46058	23.6857	1.66621		61.3937	4.36654	53.0764	3.73249	132.403	9.31055	121.957	8.57584	1076.27	75.6813		0.699549	0.0491908	0.638258	0.0448809	1.01915	0.0716648	0.584191	0.0410791	0.677236	0.0476218
Ethylbenzene		2.01497	2.14785	4.79957	2.83448	1.15865		2.50931	9.0884	8.00125	1.46901	3.36852		20.515	1.36921	22.2067	1.43894	50.7859	3.28872	76.944	4.98129	11.3259	0.734786		260.678	16.9163	485.546	31.4333	836.634	54.1621	47.3091	3.06284	698.049	45.1903		0.625847	0.0405161	0.953308	0.0617152	1.21372	0.0785738	0.463038	0.0299761	0.741335	0.0479925
o-Xylene		0.0521908	0.473351	0.29779	0.579324	0.331166		0.0266066	0.0927431	0.291462	0.405067	2.00936		0.204614	0.0247143	4.9178	0.283508	3.08638	0.178063	15.8644	0.914199	3.43666	0.198263		2.61832	0.161781	4.82951	0.278422	30.5389	1.75982	13.2176	0.761679	418.787	24.1326		0.18318	0.0105557	0.1429	0.00823462	0.150077	0.00864818	0.0812611	0.00468267	0.164152	0.00945925
m-Ethyltoluene		0.178876	0.322284	0.186853	0.313633	0.344759		0.0536598	0.0266577	0.205374	0.636221	0.730452		1.6937	0.157214	3.04168	0.261429	1.78943	0.155116	6.05569	0.520344	2.59828	0.223455		5.5184	0.485507	1.33415	0.114904	12.8985	1.10827	14.6608	1.25952	119.647	10.2785		0.13161	0.0113063	0.0950991	0.00816968	0.241334	0.0207323	0.128819	0.0110665	0.121851	0.0104679
1,2,3-Trimethylbenzene		0.636132	1.04714	0.658782	0.293503	0.281595		0.162235	0.246862	0.266099	1.32244	0.436472		6.22664	0.725476	10.7865	1.2155	6.6908	0.75434	7.04646	0.794289	0.289523	0.0702721		13.5564	1.55121	13.1333	1.47993	18.8931	2.12905	42.1384	4.74827	75.0148	8.45303		0.208266	0.0234677	0.102164	0.0115121	0.220255	0.0248187	0.187458	0.0211231	0.552354	0.0622402
o-Ethyltoluene		0	0.204668	0.153061	0.0986525	0.0787735		0.0464355	1.20941	0.136152	0.275098	0.312861		0	0	2.00759	0.176343	1.19436	0.105529	2.66164	0.233792	0.403759	0.0384633		2.82471	0	64.8009	5.69079	9.93793	0.872822	8.03523	0.705666	59.5642	5.23092		0.237452	0.0208529	0.0414865	0.00364332	0.132147	0.0116051	0.0537346	0.00471895	0.169722	0.0149049
1,3,5-Trimethylbenzene		0.0178219	0.423531	0.557804	0.573617	0.439421		0.0479801	0.193955	0.525561	0.830946	0.991791		0.0768987	0.0132243	4.36357	0.389417	5.74613	0.512944	15.6904	1.4001	4.70054	0.419491		4.99294	0.450825	10.3287	0.921663	51.1626	4.56532	26.1119	2.33001	194.682	17.3717		0.0590375	0.00526798	0.0701647	0.00626088	0.164505	0.014679	0.0982103	0.00876342	0.0773456	0.00690164
p-Ethyltoluene		0.0522646	0.275837	0.0941263	0.123728	0.0801886		0.0894375	0.073021	0.0726117	0.390894	0.447511		0.268593	0.0334308	2.8831	0.265532	0.8923	0.0830401	3.33174	0.306864	0.750264	0.0699868		7.92469	0.737532	2.81775	0.259515	7.51483	0.692075	12.7597	1.17494	93.1843	8.58048		0.0844974	0.00778058	0.0581136	0.00535114	0.130686	0.0120337	0.0738254	0.00679789	0.121636	0.0112004
Isopropylbenzene		0.0246026	0.123255	0.221267	0.145164	0.118874		0.0129937	1.25077	0.281887	0.087158	0.0954264		0	0.07795	1.12823	0.0737482	1.64018	0.10726	2.9034	0.18976	0.562792	0.0369237		0.400966	0.109498	65.3421	4.27028	21.8458	1.42769	1.45036	0.0948144	6.67506	0.436245		0.967179	0.0632078	0.0229337	0.00149878	0.0590813	0.00386112	0.0363262	0.00237401	0.0498087	0.00325513
1,2,4-Trimethylbenzene		0.0176981	0.630075	0.481822	0.779639	0.525386		0.104611	0.11854	0.48534	0.487496	1.44617		0	0.0105354	6.5403	0.577153	4.9085	0.43332	21.3429	1.88319	5.35256	0.472496		9.85892	0.880294	6.24775	0.551344	48.2138	4.2541	14.9613	1.32013	295.69	26.0898		0.117241	0.0103446	0.107742	0.00950646	0.158274	0.0139651	0.116405	0.0102708	0.163453	0.014422
n-Propylbenzene		0.0772253	0.242971	0.205994	0.261249	0.148549		0.146997	0.549682	0.282635	0.197521	0.415244		0.683695	0.0592617	2.3304	0.183836	1.10437	0.0874548	5.8253	0.459489	1.09552	0.0866431		15.0828	1.19477	28.2918	2.23149	20.4905	1.61619	4.91284	0.387524	64.782	5.10963		0.0648464	0.0051147	0.0407053	0.0032106	0.0988819	0.00779923	0.0594079	0.00468575	0.0808323	0.00637558
p-Diethylbenzene		0.0368136	0.370283	0.40247	0	0.167093		0.0774438	0.22502	0.412252	0.301005	0.201794		0.0117049	0.0236519	3.91982	0.574037	4.26057	0.623945	0	0.0191919	1.69883	0.249298		6.21454	0.925757	11.9617	1.7512	43.2938	6.33799	9.78967	1.43322	41.9561	6.14216		0.10824	0.0158457	0.102691	0.0150334	0.113565	0.0166253	0.0926995	0.0135707	0.117995	0.0172738
m-Diethylbenzene		0.0893024	0.31407	0.224208	0	0.0462039		0.0271915	0.0231927	0.20378	0.0946005	0.089232		0.115164	0.0853885	3.38573	0.415621	2.29126	0.281826	0	0.00676077	0.471672	0.0580218		2.43218	0.355411	1.21735	0.149468	21.3112	2.61607	3.06691	0.376503	18.5742	2.28004		0.430907	0.0528952	0.0261192	0.00320621	0.145478	0.0178579	0.0389447	0.00478059	0.0307085	0.00376956
Acetylene		66.8921	93.074	17.9794	41.5195	164.882		3.1173	1.57502	15.9118	3.49106	16.0225		718.052	42.3384	1003.59	58.6114	187.491	10.9594	1135.97	66.3427	1786.26	104.32		321.353	19.1731	78.565	4.60109	1667.49	97.384	107.775	6.30683	3293.11	192.321		6.87754	0.401654	5.87944	0.343364	7.91303	0.462127	6.84063	0.399499	6.51766	0.380637
Ethene		33.7385	138.104	29.4092	75.0007	142.87		33.2068	14.4084	29.3173	24.6527	95.6157		358.69	20.8117	1493.49	86.0009	311.937	17.963	2052.28	118.178	1546.97	89.0805		3441.48	198.329	747.71	43.056	3034.33	174.728	793.544	45.6953	19848.9	1142.97		2.71614	0.156405	1.61038	0.0927314	2.31995	0.133591	2.34217	0.134871	2.67333	0.15394
Propene		14.72	94.7954	38.0162	63.0086	95.2168		12.5233	9.34304	43.3194	35.9124	123.834		158.475	9.16842	1028.35	59.2259	411.438	23.696	1730.86	99.6856	1033.7	59.5342		1306.04	75.2604	494.852	28.5001	4548.78	261.978	1173.91	67.6092	25794.9	1485.61		0.716619	0.0412723	0.35855	0.02065	0.734289	0.04229	0.789753	0.0454844	0.580353	0.0334243
trans-2-Butene		0.589919	2.85288	1.03035	2.09222	1.83802		0.981306	1.58894	1.45059	2.61347	7.93047		5.78459	0.353594	30.4887	1.81692	10.7056	0.63825	56.9548	3.39411	19.5702	1.16635		99.2431	5.92295	84.0327	5.00775	150.567	8.97273	85.2796	5.08206	1649.98	98.327		0.147091	0.00876559	0.128178	0.00763849	0.312079	0.0185977	0.12721	0.00758083	0.260862	0.0155455
1-Butene		4.00706	16.9493	4.66441	11.0853	13.8445		4.07644	17.9409	4.9126	5.77718	24.1521		43.3464	2.5137	183.828	10.6218	50.3246	2.90785	304.89	17.6168	150.228	8.68034		427.209	24.6936	961.122	55.5345	515.958	29.8126	188.999	10.9206	5033.31	290.829		0.157233	0.00908506	0.126096	0.00728593	0.278005	0.0160634	0.229856	0.0132813	0.222265	0.0128427
cis-2-Butene		0.464403	2.06671	0.751405	1.5252	1.37028		0.701696	1.1446	0.986453	1.68116	5.70735		4.87904	0.28692	22.3971	1.29018	7.97226	0.459375	41.8924	2.4132	14.7574	0.850133		73.783	4.25605	60.6912	3.4961	103.673	5.97203	55.1062	3.17437	1189.84	68.5403		0.100792	0.00580607	0.0542052	0.00312247	0.194178	0.0111855	0.0882975	0.00508634	0.141849	0.00817118
isoprene		0.885024	2.84513	1.81122	2.07776	1.44636		0.438954	0.334369	1.64913	4.96557	4.0445		8.59245	0.513011	30.656	1.76532	19.3168	1.1124	56.7906	3.27027	15.382	0.885858		40.9979	2.37883	16.4224	0.945684	172.196	9.91587	162.43	9.35346	840.419	48.3953		0.310924	0.0179045	0.0357915	0.00206104	0.18055	0.0103969	0.0822865	0.00473845	0.218381	0.0125754
trans-2-Pentene		0.275725	1.99731	1.28445	1.87813	2.17288		0.251021	0.300782	1.71961	1.1269	4.11653		2.98947	0.172558	21.6869	1.24617	13.877	0.797412	51.6795	2.9696	23.591	1.35559		26.4174	1.51877	16.1158	0.926046	180.98	10.3995	36.9823	2.12507	858.262	49.3174		0.0134947	0.000775433	0.0105509	0.000606276	0.0826671	0.00475021	0.0152317	0.000875244	0.034988	0.00201047
cis-2-Pentene		0.155833	1.17552	0.75098	1.07566	1.23329		0.251816	0.198886	0.979681	0.671743	2.33769		1.67245	0.0970612	12.7449	0.732534	8.12382	0.466932	29.6072	1.70171	13.3915	0.769693		26.4983	1.52396	10.6381	0.611439	103.116	5.92671	22.0542	1.26759	487.39	28.0134		0.0161903	0.000930557	0.0251706	0.00144671	0.037998	0.00218399	0	0	0.0182782	0.00105056
1-Pentene		0.638235	5.60814	2.41253	4.81537	4.16497		0.739682	0.495001	2.86776	2.21797	10.2854		6.92166	0.399589	60.8993	3.50035	26.1721	1.50432	132.517	7.61677	45.2518	2.60097		77.8531	4.47656	26.5156	1.52405	301.908	17.353	72.7944	4.18405	2144.47	123.259		0.0303546	0.00174471	0.0238219	0.00136923	0.0477912	0.00274693	0.0241883	0.00139029	0.0344863	0.00198219
1-hexene		0.793472	1.55396	1.07316	1.68473	0.851528		0.469716	0.413144	1.16802	1.43646	5.12709		1.00465	0.477737	89.0196	0.940082	12.5185	0.613647	29.24	2.60623	13.2846	0.479807		163.988	2.64541	19.8773	1.20517	240.158	6.95647	25.1391	2.64813	433.881	61.2362		0.0421551	0.00242314	0.301734	0.0173441	0.874811	0.0502853	0.686007	0.0394326	0.837757	0.0481554
Ethane		5.24363	49.9201	25.4819	37.2988	36.3664		13.9662	22.6224	33.4666	51.7594	174.238		26.1942	2.29565	528.403	37.8506	257.255	18.4352	987.377	70.7301	381.864	27.3602		1251.34	90.0204	1162.13	83.2434	3430.12	245.699	1658.16	118.776	36232.8	2595.34		5.3969	0.386578	4.28239	0.306746	7.62758	0.546361	11.2038	0.802524	8.87058	0.635397
Propane		1.72483	13.2589	7.8229	11.093	8.54026		3.16541	5.62701	9.38893	13.595	44.0977		11.4302	0.865301	141.529	8.18224	81.0267	4.68835	300.919	17.3962	88.793	5.13799		319.078	18.6296	299.184	17.2947	984.973	56.9359	441.928	25.5466	9190.3	531.238		3.19453	0.184657	2.50766	0.144953	3.61757	0.209111	4.41142	0.254998	4.06622	0.235045
n-Butane		0.760936	4.3163	3.11385	4.17412	2.47741		1.22388	2.65213	2.73875	3.8981	13.4971		5.75742	0.407375	45.0391	2.5894	31.2206	1.79971	112.238	6.45003	24.2317	1.40052		126.434	7.33495	139.663	8.02479	284.461	16.3442	125.317	7.20134	2809.88	161.439		1.22618	0.0704492	1.63705	0.0940555	2.5454	0.146244	2.42012	0.139046	2.65059	0.152287
i-butane		0.188108	0.917408	1.89165	0.781603	0.696053		0.185013	0.367814	0.886971	1.2416	2.71889		0	0.0794723	8.82782	0.512343	18.8012	1.08748	19.9952	1.15542	5.96936	0.355363		16.7889	1.0358	17.3026	0.998851	91.7413	5.28691	39.0001	2.24886	564.405	32.5206		1.15085	0.0663113	1.06544	0.0613898	1.65073	0.0951139	1.51816	0.0874752	1.55052	0.0893398
Cyclopentane		0.0545873	0.15011	0.0969886	0.133826	0.0606711		0.0597566	0.0804159	0.0706076	0.144123	0.265471		0.323316	0.0298139	1.39815	0.0879999	0.710665	0.0490052	3.47708	0.216263	0.461567	0.0311858		6.15502	0.390743	3.74622	0.233041	7.09107	0.440782	4.52531	0.281257	55.1526	3.4243		0.136938	0.00850212	0.232547	0.0144382	0.343429	0.0213226	0.206432	0.0128168	0.198117	0.0123005
i-pentane		0	0.51785	0.557468	1.0914	0.378485		0.0688046	0.178103	0.259731	0.540158	3.22086		0	0.135699	4.31205	0.3277	2.97755	0.311495	27.9095	2.03488	1.79195	0.213306		5.92477	0.535344	8.23545	0.606271	24.2668	1.77832	15.6032	1.14486	669.225	48.6519		1.31989	0.0959538	1.31353	0.0954917	3.08114	0.223994	2.13084	0.154909	2.32337	0.168905
n-Pentane		0.560908	5.40291	5.43559	7.2301	7.75239		0.87825	0.697767	8.11969	5.60436	15.6395		5.03871	0.322681	58.3787	3.35527	57.796	3.32255	197.964	11.3778	83.208	4.78265		91.9249	5.31487	37.0957	2.13209	853.669	49.0633	182.956	10.5153	3259.76	187.35		0.548845	0.031544	0.314974	0.0181026	1.27928	0.0735248	1.04215	0.0598962	1.08472	0.0623423
Cyclohexane		0	0.0432101	0.0354587	0.0470894	0.041475		0.0343381	0.0280495	0.0248103	0.0395854	0.120975		0	0.00939636	0.377308	0.0223991	0.162608	0.015906	1.15516	0.0671149	0.249383	0.0184935		3.50036	0.208624	1.41177	0.0815932	2.3896	0.138411	1.15868	0.0673164	25.0218	1.44311		0.115207	0.00664423	0.0920979	0.0053115	0.222765	0.0128474	0.140958	0.00812936	0.20158	0.0116256
Methylcyclopentane		0.060412	0.232351	0.111061	1.14194	0.151335		0.0928349	0.0555457	0.0981597	0.203314	0.560972		0.527748	0.0304102	2.43519	0.140416	0.946026	0.0565493	31.251	1.8008	1.44278	0.0839534		8.37768	0.482744	2.88916	0.16656	10.0745	0.580716	6.49468	0.374385	116.76	6.72803		0	0	0.0889183	0.00512371	0.261014	0.0150403	0.18038	0.010394	0.202695	0.0116798
2,2-Dimethylbutane		0.0400313	0.0703466	0.0957089	0.0462692	0.0648179		0.00771283	0.0242486	0.0174773	0.0326259	0.0192496		0	0.0219913	0.35407	0.0313185	0.204928	0.0497116	0.720361	0.0524993	0.108854	0.0350154		0	0.0310323	0.88996	0.0566413	1.00498	0.075534	0.517966	0.043804	3.41762	0.200527		0.380095	0.0219703	0.410129	0.0237064	0.835258	0.0482798	0.553183	0.0319752	0.595919	0.0344454
2,3-Dimethylbutane		0.00532241	0.50125	0.0259233	0.0166667	0.0220646		0.0901603	0.0263439	0.0130368	0.0205897	0.135893		0	0.0177054	5.35093	0.307762	0.0774673	0.0125634	0.332383	0.0204489	0.103349	0.00984861		6.83228	0.398941	1.31811	0.0759937	1.16841	0.0682107	0.549624	0.0324317	28.1972	1.62154		0.104244	0.00599475	0.0943221	0.00542415	0.204273	0.0117471	0.126363	0.0072667	0.136561	0.00785319
n-Hexane		0.100822	8.21216	1.15328	1.08003	1.22523		1.5579	0.383429	2.30343	0.790275	2.09984		8.2689	0.0606291	16.3518	5.11595	10.6397	0.719439	45.3353	1.68042	8.30503	0.763467		45.9798	9.42717	20.9642	1.14235	121.018	13.8019	46.0643	1.44474	1065.32	24.9351		0.0491787	0.0028263	0.0269039	0.00154616	0.015581	0.00089544	0.0303555	0.00174453	0.0374259	0.00215086
2-Methylpentane		0.0745608	0.0692233	0.5929	0.680057	0.640661		0.0177887	0.070293	0.770567	0.795634	1.51933		0.288438	0.0351714	0	0.0164207	5.78025	0.333948	18.1225	1.04215	6.43072	0.370621		1.6094	0.108741	2.38205	0.137922	79.8725	4.59196	25.4251	1.46189	314.996	18.109		0.263633	0.0151562	0.2854	0.0164075	0.575684	0.0330958	0.432759	0.0248791	0.454231	0.0261136
3-Methylpentane		0.0232709	0.0978503	0.0498783	0.0635929	0.0568029		0.0143033	0.030524	0.0370703	0.0767412	0.119786		0.0122086	0.0103663	0.935969	0.0543286	0.259623	0.0220671	1.50882	0.0878896	0.390888	0.0259918		1.38485	0.0869046	1.50953	0.087132	3.62078	0.208893	2.27796	0.131759	24.7486	1.42355		0.121189	0.00697057	0.127012	0.00730549	0.282465	0.0162469	0.241552	0.0138936	0.226737	0.0130415
3-Methylhexane		0.22931	0.837936	0.420663	0.928813	0.563309		0.256176	0.146628	0.431799	0.462075	1.87675		1.63012	0.114348	8.02138	0.460838	3.31793	0.191016	24.0456	1.38142	5.16647	0.29699		24.3981	1.42085	2.24663	0.129151	38.8754	2.23336	11.2473	0.0309886	369.551	21.23		0.332386	0.019095	0.0820554	0.00471393	0.216901	0.0124606	0.191612	0.0110078	0.182627	0.0104916
2-Methylhexane		0.13859	0.0513692	0.0154622	0.0416879	0.025197		0.0259041	0.0206016	0.0262674	0.0458157	0.041728		0.286429	0.0539948	0.376498	0.0219866	0.0163504	0.0087657	1.04102	0.0601199	0.236649	0.013764		0	0.0384005	1.03595	0.0596476	2.61408	0.150436	1.39776	1.30149	8.66297	0.497708		0.505729	0.029055	0.0686003	0.00394121	0.151696	0.00871522	0.10643	0.00611459	0.037321	0.00214416
2,3-Dimethylpentane		0	0.0618201	0.037087	0.156776	0.0404676		0.0380378	0.0338061	0.0262787	0.114318	0.085675		0	0.00275636	0.503352	0.0290017	0.33688	0.0197341	4.26003	0.244887	0.422669	0.0243155		3.97122	0.230223	1.77771	0.102203	2.70078	0.155288	2.18781	0.125796	9.48104	0.544972		0.0339081	0.00194904	0.034796	0.00200008	0.0661895	0.00380457	0.0551652	0.0031709	0.01734	0.000996703
2,4-Dimethylpentane		0.0605043	0.0671317	0.0390285	0.0741196	0.0817792		0.0858804	0.0314984	0.0747372	0.0584153	0.0845097		0.369975	0.0275944	0.57262	0.0330323	0.147751	0.00976567	1.96618	0.113124	0.842102	0.0484917		7.96867	0.463911	1.64195	0.0944411	5.58095	0.320909	1.84391	0.106099	17.5732	1.01036		0.099539	0.00572292	0.0468369	0.00269285	0.0837874	0.0048173	0.0739379	0.00425101	0.0470925	0.00270755
n-Heptane		0.177342	1.32279	0.846076	1.16957	0.806321		0.313687	0.209782	0.876913	0.896821	3.8725		1.64553	0.104668	14.1477	0.823218	8.93983	0.520377	32.0221	1.86324	8.5788	0.499278		32.8818	1.92182	11.1209	0.64711	92.0775	5.35756	29.2738	1.70333	807.229	46.9687		0.147309	0.00857116	0.126593	0.00736584	0.255518	0.0148673	0.169931	0.00988746	0.188423	0.0109634
n-Octane		0.246666	0.185218	0.117572	0.147842	0.0233222		0.203344	0.0372897	0.112243	1.07684	0.0159204		2.60692	0.149903	1.99956	0.114981	1.09859	0.0640063	4.05541	0.233196	0.234691	0.0135389		20.4492	1.17587	1.98677	0.114245	9.05761	0.520933	34.9483	2.0096	3.3005	0.189789		0	0	0	0	0.1792	0.0103044	0	0	0	0
3-Methylheptane		0.0531946	0.359115	0.16438	0.306474	0.276545		0.0759445	0.0498559	0.137837	0.11356	0.517099		0.339316	0.0208155	3.07363	0.177423	0.553945	0.0323209	5.79569	0.334614	1.79059	0.103394		5.86451	0.339705	0	0.108176	6.58768	0.380278	0.521817	0.646232	87.4409	5.0472		0	0	0	0	0.0817677	0.00471974	0.126225	0.00728589	0	0
2-Methylheptane		0.131868	0.633225	0.602591	0.994107	0.787883		0.183021	0.0362414	0.985969	0.704872	2.01177		1.16788	0.0725251	6.78508	0.390084	6.46844	0.371907	27.3278	1.57111	8.52582	0.490165		18.1941	1.05121	1.92043	0.110416	103.735	5.96386	22.638	0.080536	419.413	24.1125		0.0903818	0.00519615	0	0	0.0806531	0.00463684	0	0	0	0

## Sheet: Paddy fires
Compounds	Diluted mixing ratios (ppb)								Actual mixing ratios (ppb)
	Flaming				Smouldering				Flaming							Smouldering
									Flaming 1		Flaming 2		Flaming 3			Smouldering 1		Smouldering 2		Smouldering 3			Ambient background (ppb)
	Flaming 1	Flaming 2	Flaming 3		Smouldering 1	Smouldering 2	Smouldering 3		mixing ratio	uncertainty	mixing ratio	uncertainty	mixing ratio	uncertainty		mixing ratio	uncertainty	mixing ratio	uncertainty	mixing ratio	uncertainty		mixing ratio	uncertainty
Benzene	18.933	17.6075	22.3634		16.9129	12.9004	1.13867		107.258	6.7009	99.6265	6.23241	248.831	15.394		1829.41	112.459	1388.53	85.3834	51.3214	3.26777		1.82727	0.112215
Toluene	3.92678	8.96954	11.8449		24.3292	17.0559	1.73353		16.9185	1.46179	46.2033	3.21509	127.306	8.17445		2641.65	162.596	1837.92	113.23	79.3144	5.23473		5.54946	0.340858
Styrene	0.0917995	0.876714	1.13967		2.69692	1.7827	0.230702		0.162007	0.0422493	4.72522	0.338234	12.4154	0.853074		292.182	19.609	190.836	12.8145	10.3869	0.71717		0.301728	0.0202287
m/p-Xylene	1.41781	3.67562	4.84569		10.7314	7.75194	0.948098		6.15467	0.568653	19.3537	1.4642	52.3654	3.73728		1162.54	80.3736	828.504	57.3139	41.2087	2.96805		1.71669	0.118511
Ethylbenzene	0.567746	1.47163	1.84317		3.38023	2.25011	0.277442		2.34603	0.224524	7.60241	0.559762	19.741	1.35115		365.148	23.9635	240.841	15.8249	12.2711	0.86342		0.860229	0.056321
o-Xylene	0.0363294	0.188405	0.261925		0.872721	0.477061	0.0696665		0	0.0215968	0.880526	0.0752177	2.71463	0.200152		93.656	6.45974	50.4763	3.4873	3.38271	0.245996		0.18154	0.0124971
m-Ethyltoluene	0.138709	0.610628	0.853415		1.58024	1.02554	0.225463		0.43663	0.0579496	3.11566	0.248546	9.32899	0.70189		168.992	12.3758	108.735	7.96986	9.96233	0.748167		0.263123	0.0192392
1,2,3-Trimethylbenzene	0.284131	2.21685	3.10781		10.9114	5.83794	1.40634		0	0.430468	9.54459	1.71827	30.9948	4.74835		1154.87	165.295	538.854	77.287	35.1812	5.34431		2.10731	0.301066
o-Ethyltoluene	0.0637519	0.228139	0.328327		0.464949	0.452554	0.0785893		0.265164	0.0275346	1.21041	0.0971028	3.6065	0.275868		48.6991	3.64491	49.0362	3.6701	3.16973	0.243253		0.0837867	0.00626026
1,3,5-Trimethylbenzene	0.0427461	0.387498	0.58472		1.9981	1.32256	0.158374		0.140298	0.0188735	2.10807	0.167397	6.49251	0.502301		215.224	16.4532	141.794	10.8418	6.99021	0.540329		0.0795595	0.00607982
p-Ethyltoluene	0.0695135	0.294154	0.425255		1.21594	0.755877	0.167924		0.111849	0.0407219	1.40862	0.135288	4.52627	0.381381		130.886	10.4345	80.4678	6.42289	7.24286	0.597148		0.253456	0.0201669
Isopropylbenzene	0.0332244	0.0754969	0.0882618		0.150386	0.104308	0.0195158		0	0.0244207	0.214256	0.0356516	0.769517	0.0689252		15.5167	1.04256	10.6402	0.7197	0.775942	0.0693309		0.222517	0.0147365
1,2,4-Trimethylbenzene	0.0512272	0.253629	0.32189		1.27157	0.695477	0.153192		0	0.0486505	0.968128	0.132526	3.02743	0.32278		132.536	12.5955	72.2954	6.88541	6.02919	0.605766		0.343105	0.0325222
n-Propylbenzene	0.0434373	0.153002	0.229526		1.07715	0.759301	0.0579119		0.145571	0.0179465	0.731091	0.0579601	2.49875	0.182486		115.775	8.18717	80.7291	5.71059	1.97177	0.145292		0.0810498	0.00572753
p-Diethylbenzene	0.0743231	0.317386	0.399253		0.7323	0.366806	0.130695		0	0.0645803	1.28806	0.180642	3.96957	0.450483		72.7042	7.50223	34.6233	3.59377	3.96297	0.449811		0.385364	0.0395544
m-Diethylbenzene	0.0519604	0.0858983	0.054107		0.122825	0.0753763	0.0445404		0.161353	0.018421	0.369676	0.0359337	0.444477	0.0423017		10.1177	0.873277	6.798	0.587998	1.4092	0.124985		0.0438384	0.00376738
Acetylene	54.2224	31.6288	41.2166		5.10989	3.60304	0.291801		309.9	26.3722	179.189	15.3877	459.467	38.9433		553.072	46.8111	387.278	32.8757	11.1353	1.33348		3.79375	0.318894
Ethene	41.5927	66.0781	88.5128		82.6682	59.028	6.90119		228.968	26.3127	379.174	43.3381	973.014	110.654		8810.97	999.158	6207.81	704.065	254.012	29.1512		3.10766	0.352282
Propene	10.9951	45.1356	59.3186		125.668	94.4919	7.63223		62.4895	3.85607	260.48	15.9476	665.139	40.6612		13682.1	835.645	10243.4	625.633	383.944	23.4879		0.642971	0.039268
trans-2-Butene	0.295321	3.06914	3.94912		13.2172	9.74403	0.944245		1.47984	0.103662	17.612	1.12484	44.0692	2.80077		1437.26	91.0542	1055	66.8394	47.115	2.99371		0.143897	0.00911532
1-Butene	1.33716	7.4988	9.90156		23.4838	17.5758	1.50801		7.50702	0.485022	43.2266	2.74467	111.014	7.03325		2557.77	161.828	1906.33	120.615	76.5008	4.84976		0.156261	0.00988593
cis-2-Butene	0.242725	2.33137	3.02348		9.94207	7.30109	0.695249		1.21898	0.0825862	13.3932	0.843734	33.7262	2.11559		1081.45	67.6535	790.295	49.4411	34.6034	2.17047		0.0944998	0.00591123
isoprene	1.5243	16.2522	10.2143		75.3833	61.1938	3.80565		8.18029	0.534903	93.4669	5.73291	114.131	6.99278		8213.28	500.802	6638.48	404.786	193.15	11.8106		0.557362	0.0339827
trans-2-Pentene	0.114179	1.02846	1.29251		4.09555	2.99388	0.287132		0.595132	0.0407823	5.88453	0.363837	14.462	0.888256		446.26	27.2893	324.889	19.8684	14.6247	0.898203		0.0654262	0.0040003
cis-2-Pentene	0.0774314	0.648492	0.818714		2.22287	1.67612	0.150638		0.418917	0.0276313	3.72268	0.23046	9.17303	0.565236		242.215	14.8796	181.896	11.1746	7.67781	0.473394		0.0290474	0.00178421
1-Pentene	0.160517	1.5699	2.11556		6.3039	4.50467	0.384675		0.873278	0.057083	9.02702	0.556337	23.7228	1.45647		686.932	42.0795	488.88	29.9484	19.6252	1.20549		0.0553609	0.00339098
1-hexene	0.18486	1.7176	2.30829		18.2293	11.8297	0.295951		0.76915	0.0372426	9.6365	0.209577	25.6441	0.495342		1986.29	22.3029	1282.59	13.8659	14.1773	0.786572		0.350084	0.0214898
Ethane	11.5452	64.4275	91.4302		189.091	188.932	19.8238		59.3528	4.10984	365.581	22.7808	1019.7	62.7392		30353.4	1854.9	20458.8	1250.39	975.433	60.035		7.15138	0.43692
Propane	1.3926	13.4438	18.8569		74.8941	49.7502	5.24282		4.33587	0.521787	74.7125	4.73978	207.786	12.8322		8152.65	496.247	5391.41	328.235	261.659	16.1097		3.06415	0.186443
n-Butane	0.406203	2.91009	4.00527		17.2124	11.1878	1.31107		0.301581	0.16961	15.3567	1.04751	42.4273	2.71405		1866.88	115.361	1204.82	74.4822	60.94	3.85619		1.47905	0.0913233
i-butane	0.262052	0.95041	1.15486		4.60921	2.97923	0.401013		0.201148	0.108469	4.55202	0.348166	11.2575	0.755345		494.559	30.4859	315.994	19.4998	15.9013	1.03982		0.946398	0.0582268
Cyclopentane	0.0351731	0.982532	0.10694		0.331015	0.218487	0.048264		0	0.013454	5.56087	0.352985	0.936369	0.0666633		34.869	2.17199	22.5989	1.4104	1.96105	0.129832		0.123373	0.00765772
i-pentane	0.287641	0.938466	0.83856		2.68926	1.73573	0.281595		0.128872	0.147212	4.08757	0.352679	7.6811	0.565394		288.037	17.7454	183.875	11.3583	11.1144	0.772635		1.34174	0.082277
n-Pentane	0.118473	0.909962	1.15002		5.07872	3.23541	0.395687		0.0448284	0.0622361	4.69181	0.325526	12.209	0.782732		551.299	33.7284	349.017	21.3657	18.9345	1.19323		0.572604	0.0349955
Cyclohexane	0.0225661	0.116886	0.214359		1.0786	0.886551	0.0414816		0	0.0164094	0.51357	0.0443148	2.24668	0.150159		117.381	7.29267	96.0632	5.97006	1.95961	0.13244		0.162651	0.0100912
Methylcyclopentane	0.0236553	0.0942602	0.119174		0.33763	0.222052	0.0772452		0.0270116	0.0127824	0.435483	0.0350097	1.22963	0.0832581		36.6845	2.27183	23.9916	1.48814	3.84215	0.244198		0.109841	0.006782
2,2-Dimethylbutane	0.0625173	0.198166	0.113244		0.0224142	0.0218122	0.0290136		0.0284875	0.0362851	0.813257	0.0757151	0.93963	0.0829069		2.10946	0.15196	2.0343	0.147454	1.15119	0.0951318		0.333194	0.0203531
2,3-Dimethylbutane	0.0643034	0.200274	0.261077		0.201176	0.196274	0.0094803		0.27851	0.0241447	1.06514	0.071316	2.84091	0.179634		21.8303	1.34075	21.21	1.30282	0.391523	0.030744		0.0935044	0.00571818
n-Hexane	0.0839077	0.583905	0.741829		3.3606	2.10525	0.273748		0.000598052	0.0709559	3.02799	0.613286	7.70418	1.60001		362.979	122.498	225.535	79.1061	12.4541	0.893109		0.300321	0.0185185
2-Methylpentane	0.0432641	0.225318	0.040285		0.63162	0.388448	0.061103		0.000585315	0.0232475	1.08501	0.0822094	0.169404	0.0304361		67.934	4.18226	41.4518	2.55719	2.59782	0.173864		0.218526	0.01341
3-Methylpentane	0.023621	0.101432	0.186863		0.221339	0.145377	0.0255825		0.00399896	0.0117762	0.478215	0.0375086	1.94362	0.127256		23.6015	1.46617	15.202	0.946788	0.945404	0.0658637		0.108603	0.00671557
3-Methylhexane	0.0487346	0.246737	0.316294		0.687337	0.0865043	0.0556958		0	0.00466746	1.16278	0.0754352	3.12248	0.196678		73.1707	4.53353	9.33585	0.58133	1.60346	0.102681		0.0532929	0.00329953
2-Methylhexane	0.0535001	0.00915192	0.019216		0.232938	0.142952	0.0468759		0.246744	0.020083	0	0.012198	0	0.0111851		25.3224	1.58331	12.3849	0.776396	0	0.088808		0.0627706	0.00391506
2,3-Dimethylpentane	0.0451888	0.0213572	0.0569586		0.129648	0.0979285	0.0639704		0.236522	0.0163503	0.0204524	0.00355979	0.402925	0.0266075		14.1039	0.875727	4.63407	0.288778	3.24792	0.202866		0.024909	0.00154389
2,4-Dimethylpentane	0.0225236	0.258727	0.0778572		1.47541	1.12738	0.073131		0.0682532	0.00962434	1.43476	0.0918554	0.813037	0.0538786		158.776	9.7307	120.716	7.39909	3.67944	0.229274		0.062053	0.00380149
n-Heptane	0.0315949	0.290227	0.383264		0.397157	1.14551	0.131065		0.0511409	0.0163083	1.54741	0.105594	4.17612	0.269514		43.1498	2.70539	124.201	7.7716	6.57386	0.419298		0.131645	0.00822867
n-Octane	0.0267143	0.224345	0.287497		1.32375	0.807182	0.112901		0	0.0122479	1.09504	0.0796724	2.95074	0.198926		144.134	9.30995	84.28	5.44725	4.39134	0.29179		0.126478	0.00816238
3-Methylheptane	0.00481192	0.152278	0.141337		0.533117	0.409868	0.043301		0	0.00566828	0.820682	0.0559327	1.47761	0.0973359		58.0378	3.67147	44.4266	2.81132	1.17785	0.0784287		0	0
2-Methylheptane	0.0242194	0.151013	0.162308		0.743582	0.513963	0.0683158		0	0.00666302	0.695755	0.0474955	1.66086	0.10852		79.7905	5.05849	55.7348	3.5344	2.7659	0.178495		0	0

## Sheet: petrol vehicular
		Diluted mixing ratios (ppb)																								Actual sample mixing ratios (ppb)
		Two wheelers														Four wheelers										Two wheelers														Four wheelers
Compounds		splendor	passion	activa	bullet	Bajaj scooter	Splendor bike	Hero Honda Passion	Honda Shine	Hero Passion X-Pro	Honda Shine	Hero Honda CD Deluxe	Honda CB Twister	Hero Honda Splendor +	Bajaj Platina	alto	Maruti 800	C5 i10 Petrol	WagonR Petrol	Omni Petrol	Maruti Swift Petrol	Maruti Estilo	Honda city Petrol	Alto 2011		splendor	passion	activa	bullet	Bajaj scooter	Splendor bike	Hero Honda Passion	Honda Shine	Hero Passion X-Pro	Honda Shine	Hero Honda CD Deluxe	Honda CB Twister	Hero Honda Splendor +	Bajaj Platina	alto	Maruti 800	C5 i10 Petrol	WagonR Petrol	Omni Petrol	Maruti Swift Petrol	Maruti Estilo	Honda city Petrol	Alto 2011
Benzene		26.0008	43.3941	25.7196	21.3511	9.80749	11.8896	18.6335	16.4755	28.2419	53.1504	45.4566	20.487	15.3435	40.9751	2.68823	3.68403	116.526	4.94416	47.112	14.4783	5.85891	102.859	140.768		2733.51	1873.14	3143.71	2226.79	4963.86	1195.39	7463.46	6592.38	3703.36	5354.42	4587.05	5134.77	4620.97	6292.36	2.68823	187.717	4792.63	53.2181	10620.6	258.291	5.85891	2113	1704.02
Toluene		97.3605	131.849	45.796	76.4522	76.4544	64.788	49.9767	31.3228	65.3861	90.7803	163.049	159.643	134.464	161.262	29.9445	13.3752	94.9509	7.1165	109.166	32.5964	21.685	84.0395	19.4691		10264.4	5692.88	5596.27	7984.89	38851.8	6541.15	20038.7	12542.5	8707.47	9183.55	16523	40042.4	40537.1	24718.9	29.9445	685.996	4099	76.8886	24637.3	579.401	21.685	1725.26	235.287
Styrene		15.9653	22.127	7.26496	13.3245	10.432	7.46368	7.54709	4.03036	11.6146	21.684	27.0367	30.5533	24.1694	19.6691	4.50729	2.69675	24.5014	1.34031	11.3165	5.42938	4.31301	13.5574	5.20578		1681.56	952.833	887.85	1382.71	5280.65	753.832	3026.38	1613.46	1523.84	2194.42	2729.77	7619.43	7257.82	2973.24	4.50729	138.716	1009.4	14.5727	2535.99	95.2023	4.31301	278.212	62.2757
m/p-Xylene		53.9245	70.8961	22.9509	46.4329	38.6639	10.2659	33.0491	13.2363	44.1133	59.7957	97.7729	122.382	82.4455	74.8427	14.3788	7.73369	60.9913	2.79369	53.8239	17.9157	19.3305	38.1512	115.561		5670.36	3052.27	2806.43	4828.64	19606.1	1027.9	13223.9	5296.56	5826.93	5999.18	9801.15	30624.6	24780.3	11352.9	12.2252	398.043	2567.19	28.0586	12148.2	317.078	19.3305	782.806	1397.91
Ethylbenzene		22.6662	29.8149	10.2483	19.6203	16.5692	11.1201	13.2357	7.24174	18.7453	27.6483	45.2269	48.4778	38.6993	36.5825	5.40876	3.55672	15.5469	2.63938	22.5612	8.3661	6.2876	10.8757	1.93772		2371.53	1286.33	1249.27	2046.19	8411.13	1115.86	5298.9	2894	2486.38	2779.93	4550.69	12148.5	11656.8	5582.74	5.40876	182.746	662.862	28.5825	5075.05	148.411	6.2876	222.972	23.0236
o-Xylene		2.00524	2.17223	6.20265	1.5775	1.87708	1.21824	0.551689	0.275667	0.823181	3.17655	1.98033	2.7345	2.20538	1.57605	1.96301	0.933723	7.51917	1.04132	0.968067	0.90362	0.759323	2.89852	2.41408		211.577	93.6222	758.273	164.023	943.043	123.042	221.227	110.408	106.52	321.467	199.178	681.522	657.982	237.411	1.96301	47.9616	281.214	11.535	217.505	15.9639	0.759323	59.5577	28.4066
m-Ethyltoluene		10.0082	15.1005	4.66054	9.48685	6.22218	4.06074	3.75388	1.78006	7.10804	11.1353	14.3369	16.8197	12.6326	8.07196	1.30922	1.81896	8.97528	0.637127	8.0782	4.47628	4.91293	7.16203	0.860027		1049.7	648.101	570.217	975.888	3135.52	407.379	1502.76	711.817	916.439	1119.33	1433.68	4182.4	3787.93	1217.17	1.30922	93.5861	349.375	6.55101	1815.03	78.9285	4.91293	146.97	9.21051
1,2,3-Trimethylbenzene		3.61389	6.73498	1.69802	3.85572	1.95001	1.29512	1.46365	0.538066	3.23881	3.83609	5.92577	7.49939	6.06422	2.71852	0.999747	0.750419	6.39481	4.98426	2.66499	2.68286	3.26299	5.29411	3.52184		371.93	285.898	209.026	386.177	958.308	130.807	586.925	214.105	415.993	388.212	589.455	1830.4	1807.73	406.977	0.999747	38.1513	252.19	50.6579	598.978	46.3324	3.26299	108.571	39.4458
o-Ethyltoluene		3.92718	6.22778	1.78963	3.8048	2.43146	1.49519	1.54161	0.688941	3.04122	4.13855	6.0718	7.25799	5.60313	3.40667	0.628736	0.683223	4.10323	0.222273	3.12244	1.83605	1.70703	2.92505	0.569788		414.365	267.599	217.441	389.82	1222.14	149.838	616.973	275.929	394.263	415.563	605.074	1796.04	1677.18	504.689	0.628736	35.1473	162.635	2.34416	698.509	32.0459	1.70703	60.0023	5.82323
1,3,5-Trimethylbenzene		3.95937	5.98097	1.67804	3.55611	2.60762	1.58248	1.71113	0.599179	2.91407	3.77874	6.22184	6.13487	5.91448	3.52644	0.558809	0.855757	6.45226	1.24476	2.94434	2.02178	2.04825	6.25505	1.30164		417.762	256.794	205.106	365.326	1313.51	159.831	686.162	239.978	378.013	382.409	625.559	1519.75	1771.67	523.829	0.558809	43.9674	249.842	12.7336	657.881	35.5396	2.04825	128.526	13.9698
p-Ethyltoluene		4.30443	6.6713	2.09668	4.27735	2.37321	1.58248	1.78855	0.792002	3.42502	4.71322	6.72112	7.32396	5.59126	3.77588	0.54704	0.754178	3.45653	0.8272	4.59261	2.16728	1.98121	3.22446	0.501382		454.169	286.747	255.795	440.548	1192.12	159.831	717.209	317.206	446.349	476.978	676.26	1817.86	1675.15	560.252	0.54704	38.7497	135.923	8.53472	1028.6	37.9291	1.98121	66.1008	5.60044
Isopropylbenzene		1.17468	1.76256	0.517651	1.1814	1.04467	0.832037	0.533704	0.281763	0.880747	0.922625	1.93013	2.45281	1.93035	1.45426	0.304283	0.224588	1.13233	0.376915	0.860698	0.445681	0.262465	1.13757	0.15169		123.199	75.6668	63.2569	121.366	520.2	83.6899	213.594	112.671	117.104	92.6408	193.79	613.639	580.976	220.64	0.304283	11.5449	48.645	3.85576	192.553	7.9854	0.262465	23.3744	1.68376
1,2,4-Trimethylbenzene		0.404232	0.636616	0.149946	0.361564	0.311754	3.80902	0.0999706	0.0483697	0.241893	0.319929	0.427601	0.735771	0.539961	0.204598	0.142669	0.179234	1.58495	3.03607	8.08573	0.335132	0.495111	1.05586	0.476654		40.9525	26.5801	18.3084	37.223	145.783	384.667	40.0122	19.1694	32.0798	32.1336	41.9751	182.188	160.626	30.6525	0.142669	9.01779	62.4944	31.9141	1812.99	5.75567	0.495111	21.5508	5.23842
n-Propylbenzene		3.13488	4.57275	1.1927	2.83778	2.0913	1.61327	1.06061	0.530369	2.04678	1.81821	3.95194	5.43988	3.97437	2.55908	0.370625	0.403749	1.38911	0.130389	2.07155	1.21698	1.40178	1.26759	0.261751		328.786	196.325	145.747	294.195	1055.07	162.579	425.528	212.084	265.058	184.385	399.956	1357.32	1194.39	383.304	0.370625	20.7622	54.8756	1.33566	464.27	21.1507	1.40178	25.9313	2.89759
p-Diethylbenzene		1.59872	3.32494	0.847371	1.95194	0.87294	0.654539	0.498767	0.188592	1.26301	2.08369	2.07145	2.73412	2.12843	0.787955	0.563817	0.529168	1.92034	0.154645	1.67448	1.68217	2.46895	2.19043	0.155517		166.958	141.193	103.634	196.042	419.522	66.1084	200.006	75.3296	164.936	210.869	204.559	671.154	631.799	118.012	0.563817	27.1585	79.6942	1.57709	376.815	29.2386	2.46895	44.8302	1.65314
m-Diethylbenzene		0.856199	1.69283	0.374787	0.960943	0.425602	0.343661	0.130279	0.0503121	0.285535	0.680201	0.505748	0.621262	0.517456	0.197272	0.17653	0.130277	0.763792	0.33315	0.661602	0.367749	0.487342	0.3469	0		88.2242	71.6389	46.0988	96.5075	202.641	34.6446	52.2417	20.0263	37.4421	68.8363	49.9431	153.046	154.319	29.4277	0.17653	6.64526	31.2391	3.4312	148.617	6.58907	0.487342	7.12797	0
Acetylene		104.744	181.845	175.716	21.7248	6.35703	15.3761	174.864	166.379	171.902	29.2401	125.885	14.4852	8.15168	141.36	4.24274	1.04021	0.509104	15.5896	51.8749	0.708556	5.15522	0.158192	0.438186		10923.8	7863.69	21472.5	2275.84	3235.02	1552.99	69999.9	66433.6	22672.1	2959.1	12756.8	3569.08	2367.4	21647.3	4.24274	53.5502	22.3436	166.179	11669.6	12.6954	5.15522	3.25048	5.30585
Ethene		67.9658	118.355	159.897	61.0843	15.5569	15.567	44.4815	29.0009	51.3695	151.544	97.5646	25.089	20.9157	86.9565	2.25249	0.255609	130.644	7.49823	180.884	32.5531	1.63634	33.3787	38.8156		7149.96	5100.29	19427.4	6346.38	7789.53	1560.64	17806.4	11606.2	6765.88	15231.6	9793.48	6219.83	6201.63	13158.6	2.25249	12.8931	5579.9	76.1101	40673.8	578.769	1.63634	684.273	444.285
Propene		41.2248	74.3725	36.3903	35.6805	10.7271	20.9217	26.8694	16.5814	34.4813	78.0695	69.9333	24.817	21.4162	65.0542	1.19757	0.235243	52.6281	3.11912	89.7149	10.5915	0.963765	26.9279	7.73847		4342.65	3212.07	4428.7	3728.19	5421.39	2110.92	10780.3	6638.19	4496.01	7917.02	7108.3	6227.14	6458.06	9998.72	1.19757	11.8225	2125.7	32.069	20068.2	188.912	0.963765	552.938	89.8741
trans-2-Butene		4.18247	7.79853	5.54406	6.38158	4.51495	3.07312	1.9967	1.01925	2.89582	15.5928	5.84731	5.01951	5.78171	8.76923	0.264757	0.938305	8.80197	0.830105	6.38616	2.82374	0.558768	3.81383	0.542931		437.559	336.403	676.93	666.683	2291.02	307.981	799.158	407.31	383.494	1566.14	588.348	1259.73	1744.25	1347.15	0.264757	48.8294	373.465	8.47404	1426.73	50.3583	0.558768	78.3025	6.3073
1-Butene		5.76928	10.9847	13.771	9.71541	2.74897	3.74274	3.98805	2.191	4.87622	22.6124	10.3385	5.24983	4.84612	11.9628	0.242696	1.33145	4.47214	1.01495	7.55416	2.26253	0.372725	1.91051	0.408313		608.729	474.493	1683.23	1016.15	1390.92	375.953	1596.46	877.523	638.688	2272.77	1041.88	1318.27	1462.98	1840.92	0.242696	68.3431	183.252	10.6401	1689.46	40.3937	0.372725	39.22	4.3132
cis-2-Butene		2.97264	5.50602	4.05337	11.2836	2.99459	2.40776	1.39739	0.750586	2.11938	47.8391	4.07691	3.56697	3.81617	7.51503	0.131487	0.0619615	7.76546	0.534437	4.47903	3.06594	0.328323	2.58691	0.523886		309.096	238.102	495.444	1182.04	1511.18	241.071	558.957	299.469	274.756	4793.48	409.011	895.337	1150.91	1154.27	0.131487	3.26599	307.786	5.69688	1044.51	54.9334	0.328323	53.1549	6.05934
isoprene		4.77696	1.6608	3.09689	0.695297	0.842963	6.79547	1.86553	0.70911	1.62151	1.13384	4.13225	2.27862	2.46897	6.56175	0.0100701	2.679	1.28358	13.098	0.486546	0.0169411	0.0936634	0.167152	1.15548		501.008	71.3762	378.44	71.8534	413.816	682.741	748.655	283.559	212.272	115.096	420.04	570.488	743.168	1004.67	0.0100701	134.352	52.5113	132.028	109.406	0.303584	0.0936634	4.33259	12.6178
trans-2-Pentene		3.88253	5.50476	2.11727	3.45461	5.35652	3.7015	1.3939	0.901496	2.37248	6.34565	6.24946	7.44264	8.61881	9.68317	0.110281	0.64532	1.966	0.150655	3.04152	0.620472	0.18655	1.07843	0.528745		399.258	238.048	258.794	361.897	2723.74	370.752	557.894	358.646	309.585	637.358	629.367	1868.91	2601.9	1490.11	0.110281	32.5564	85.5049	1.60592	680.185	11.1172	0.18655	22.1592	6.26288
cis-2-Pentene		1.78575	2.62309	1.01975	1.97944	2.29666	1.75017	0.694036	0.457885	1.13924	4.06915	2.91137	3.39222	3.82033	4.30665	0.0571198	0.0104922	1.00154	0.0845301	1.95284	0.297217	0.0850231	0.473792	0.312628		181.294	113.433	124.645	207.362	1168.74	176.077	277.781	181.562	149.115	408.705	293.197	851.813	1153.31	662.734	0.0571198	0.538985	43.9555	0.901056	439.17	5.32534	0.0850231	9.73529	3.62963
1-Pentene		1.00136	2.00246	0.677265	1.04516	1.20662	0.990231	0.623443	0.386858	1.96195	2.66576	1.91047	1.8272	1.98196	2.36282	0.0418918	0.0245249	0.387235	0.190688	1.56156	0.109811	0.04802	7.28952	0.310649		102.97	85.8228	82.7821	107.409	607.037	99.8706	249.527	153.904	255.23	267.748	192.398	458.825	598.326	363.606	0.0418918	1.25837	15.5229	2.03265	349.447	1.96752	0.04802	149.782	3.61367
1-hexene		0.423273	0.638821	0.205115	0.537236	0.5912	2.32409	0.405804	0.193668	0.389825	0.985835	0.844236	0.859001	0.819821	0.999391	0.0358941	24.1377	0.00870345	0.0888966	0.473442	0.253799	0.327024	0.265801	0.196802		44.3929	27.4565	25.0651	55.518	292.981	234.265	162.853	77.444	50.8994	100.072	85.023	216.587	247.493	153.792	0.0358941	1231.26	0.353099	0.896078	106.119	4.4429	0.327024	5.41904	2.28079
Ethane		19.6698	35.4736	20.4014	12.7862	4.65537	7.02955	15.4974	9.31875	16.6488	37.4244	40.9373	8.50924	5.62791	31.5134	64.9182	1.27324	150.015	30.863	56.1139	159.432	10.381	120.606	142.759		2009.44	1526.88	2488.96	1311.24	2311.5	709.422	6213.22	3701.02	2189.65	3784.35	4150.52	2136.74	1698.99	4849.48	12.7937	64.1094	6229.29	303.045	12643.6	2854.92	10.381	2477.23	1720.35
Propane		1.47489	2.88563	1.17009	0.583807	0.436681	0.815342	0.848011	0.770119	1.39688	2.56816	2.22719	0.517244	0.496912	2.13468	0.789394	1.3619	5.67133	13.8487	2.10916	4.1665	0.944719	3.33179	7.98044		155.619	124.786	142.985	61.1583	222.222	81.6565	339.331	308.442	185.631	257.715	224.094	129.884	150.011	328.497	0.789394	70.6012	248.904	147.622	476.1	74.6526	0.944719	68.4603	89.4657
n-Butane		3.50971	4.7459	1.70458	2.69792	5.47363	2.98234	1.04101	0.358458	1.94583	5.3552	4.12439	6.40893	7.80666	7.09947	0.9539	1.52578	16.122	13.0973	0.976929	6.93282	2.2855	6.89192	17.0199		370.317	205.231	208.129	282.628	2773.52	302.141	417.769	143.567	256.286	543.606	419.77	1609.33	2355.96	1092.51	0.9539	78.822	672.386	139.612	220.361	124.218	2.2855	141.612	201.114
Isobutane/ 2-Methylpropane		1.05426	1.82197	0.623705	0.733667	1.99614	0.851366	0.306342	0.121993	0.540255	1.17185	1.1081	1.34402	2.15547	1.83587	0.369119	0.663625	4.09412	28.977	2.41097	2.71379	1.29772	2.89889	4.06296		111.237	78.7891	76.2168	76.8574	1015.81	85.9199	122.819	48.8597	70.714	118.498	111.914	336.871	649.616	280.654	0.369119	34.2828	179.683	308.883	539.618	48.6239	1.29772	59.5652	44.8573
Cyclopentane		11.1758	11.669	3.38822	10.1652	6.36267	7.63345	2.35897	2.15485	4.6054	2.04521	9.58708	14.7596	10.344	19.868	0.385241	0.589429	9.10477	1.45145	2.73568	4.57842	0.514666	11.2673	7.87751		1179.19	504.614	414.142	1064.89	3237.89	770.365	945.759	863.044	602.801	206.811	972.006	3706.24	3122	3054.63	0.385241	30.4499	372.294	15.4719	615.058	82.033	0.514666	227.824	94.8106
Isopentane/2-Methylbutane		66.4291	90.5297	31.2943	56.901	92.0394	75.9803	28.9671	14.6735	46.9797	66.3376	117.108	163.08	179.993	190.021	2.58194	8.23282	167.12	23.7285	45.6865	109.663	4.8222	109.076	184.715		7009.07	3914.86	3824.16	5960.83	46128.6	7674.01	11615.8	5876.92	6068.84	6713.37	11881.6	40942.9	54325.4	29219.3	2.58194	425.637	6714.89	252.936	10271.6	1964.88	4.8222	2205.51	2235.38
n-Pentane		23.5338	29.1708	10.3209	20.032	24.5028	22.5498	10.7288	5.49473	14.9789	22.1148	39.8558	57.6511	59.4058	61.7326	1.0475	3.5096	56.9739	3.72693	8.37951	30.7288	1.47338	30.1675	58.4716		2483.1	1261.46	1261.22	2098.51	12433.1	2277.53	4302.23	2200.71	1983.51	2238.02	4043.7	14475.4	17931.5	9495.24	1.0475	181.306	2416.63	39.7276	1887.65	550.578	1.47338	619.87	707.782
Cyclohexane		7.35015	7.40777	2.36438	5.03884	8.39111	8.26458	3.90326	2.35172	4.90137	1.32924	14.3734	21.5937	19.217	21.0931	0.321362	8.48875	15.2421	0.889009	3.74073	6.3552	0.274254	8.63845	14.974		775.53	320.341	288.691	527.858	4270.13	834.723	1565.21	941.892	641.54	134.519	1458.43	5411.75	5801.35	3245.93	0.321362	436.799	668.946	9.47647	843.484	113.868	0.274254	177.5	181.19
Methylcyclopentane		6.22079	6.33988	2.10148	4.36075	7.58687	6.52223	4.34428	2.35682	5.09914	4.37379	15.3102	22.3927	20.4934	23.2035	0.186504	6.11714	9.28879	0.704834	3.97355	4.64693	0.30413	7.17839	9.44947		651.379	272.884	256.59	455.607	3860.87	658.745	1742.06	942.046	667.426	442.628	1553.48	5622.97	6186.68	3570.7	0.186504	315.091	407.667	7.51323	895.719	83.2605	0.30413	147.499	114.246
2,2-Dimethylbutane		24.5796	36.0029	12.5294	20.2865	30.481	20.0457	9.21937	5.18647	12.3585	23.4969	34.6553	46.0618	50.224	52.7375	1.85219	4.42998	66.3494	2.8364	15.5378	52.7501	1.38891	45.4803	116.599		2593.44	1556.69	1531.47	2125.17	14963.4	2021.56	3695.56	2077.24	1617.85	2374.31	3510.94	11565.6	15160.8	8114.03	1.85219	229.163	2714.16	28.9058	3486.24	944.937	1.38891	934.473	1411.67
2,3-Dimethylbutane		6.8767	8.11199	2.7727	5.25567	6.35944	7.55851	2.25068	1.40907	3.1623	7.04292	8.67884	12.7464	12.7075	13.1161	0.237641	0.629224	16.4218	0.558155	3.20687	6.72378	0.264306	8.63206	22.9904		725.575	350.794	338.907	550.573	3228.38	761.493	901.951	564.351	413.154	710.957	878.275	3199.69	3834.99	2015.82	0.237641	32.6567	700.41	5.94971	722.958	120.342	0.264306	177.368	278.274
n-Hexane		6.7334	7.76374	2.61227	5.67185	10.7647	0.519264	6.34169	3.50934	7.3413	6.50828	21.6629	30.7382	29.0545	32.6349	1.03965	24.1424	0.128632	0.292294	3.11922	0.0775897	0.0303413	0.141568	16.8028		710.441	335.704	317.391	594.183	5460.38	52.1843	2543.02	1405.52	956.204	658.638	2198.13	7734.34	8768.59	5017.9	1.03965	1231.26	5.43469	2.90912	695.738	1.3902	0.0303413	2.90888	203.194
2-Methylpentane		17.7374	19.7322	6.69123	13.244	18.9668	19.8126	6.98589	4.33799	9.45862	16.612	26.5463	38.3835	37.4599	40.3045	0.796924	1.59926	36.8599	1.82113	9.61359	17.3771	0.912247	22.3698	47.9996		1858.68	852.806	819.675	1385.72	9633.44	2001.07	2801.34	1734.28	1247.69	1681.14	2693.37	9637.18	11307	6199.95	0.796924	81.6264	1581.64	17.9282	2150.04	311.26	0.912247	459.572	581.074
3-Methylpentane		7.62033	8.2998	2.70959	5.90854	10.4409	8.6085	3.56192	1.89769	5.56609	5.43345	14.0302	20.5171	19.791	21.6305	0.272479	0.70579	11.821	0.816611	4.95372	9.27297	0.426656	10.4437	18.5991		799.731	358.745	331.193	618.966	5304.83	869.459	1428.33	758.976	724.037	549.865	1423.5	5151.41	5973.79	3327.52	0.272479	36.5952	509.28	8.70474	1112.15	166.08	0.426656	214.567	225.095
3-Methylhexane		7.9976	9.37468	3.10193	6.27021	10.223	7.9057	3.15811	1.96938	3.95173	7.26605	11.3959	15.7217	14.6196	16.3645	2.30334	10.587	17.3315	0.398594	5.27151	5.93308	0.52181	9.2384	16.0167		836.473	403.064	377.505	653.988	5149.35	791.986	1263.81	786.946	516.492	729.36	1146.24	3946.73	4411.24	2514.75	2.30334	545.114	705.409	4.01264	1179.73	105.696	0.52181	189.658	193.773
2-Methylhexane		6.22957	7.04036	2.4032	4.96129	8.47202	6.46067	2.60799	1.74458	3.2316	5.43935	9.61779	13.6335	12.6618	14.1762	2.11315	7.31439	12.9831	0.449824	3.96122	4.6292	0.226306	7.64112	12.1551		652.649	302.602	292.95	516.589	4294.89	646.584	1043.41	697.426	419.947	545.458	966.034	3421.35	3818.69	2174.88	2.11315	376.914	544.637	4.68587	892.902	82.2511	0.226306	156.834	147.037
2,3-Dimethylpentane		2.34145	2.64405	0.902463	1.89583	3.25213	2.56401	0.843591	0.586738	1.14802	2.18256	3.19685	4.59673	4.41593	4.8444	0.488609	4.22235	5.4529	0.23742	1.42242	2.0157	0.123793	2.93528	6.00901		247.051	114.339	110.615	198.603	1654.97	258.965	338.28	234.995	149.117	220.875	324.376	1154.28	1333.11	745.486	0.488609	217.617	239.317	2.5308	320.228	36.116	0.123793	60.3131	72.6405
2,4-Dimethylpentane		1.45027	1.50557	0.550785	1.11546	1.98977	1.2917	0.6159	0.410295	0.791135	1.32692	2.02601	3.03908	2.93498	3.54397	0.175808	2.2568	2.77198	0.0750246	1.02829	1.5102	0.105959	2.02146	2.74866		153.021	64.2299	67.4326	114.714	1012.57	130.461	246.976	164.328	102.761	134.284	205.059	762.057	882.87	539.613	0.175808	116.333	121.657	0.799732	231.395	27.0588	0.105959	41.5363	33.0192
n-Heptane		8.45322	10.1968	3.46737	6.57866	9.50952	8.15305	3.92987	2.49438	4.6948	9.08127	13.8141	16.8689	15.875	18.0582	5.10281	8.30374	17.8965	0.789666	5.08059	5.13846	0.845346	8.94488	14.872		891.916	440.242	423.817	689.166	4832.08	816.625	1572.59	999.03	610.934	911.414	1389.58	4234.2	4789.4	2774.76	5.10281	427.946	771.883	7.8984	1143.63	91.5172	0.845346	183.796	179.921
n-Octane		5.30122	5.64002	1.81824	4.03286	5.39176	3.83932	2.73784	1.49591	3.10202	4.55246	8.72782	12.1817	10.0785	10.2798	5.73863	2.55314	11.6727	0.87825	2.70939	2.54975	0.92323	6.41058	7.6223		556.644	243.1	224.37	421.465	2736.73	387.771	1097.87	598.367	408.163	460.709	884.393	3054.46	3034.74	1572.3	5.73863	131.505	496.986	9.36178	611.273	45.4246	0.92323	131.722	91.9191
3-Methylheptane		4.45651	4.70536	1.5122	3.49089	4.76188	3.36517	1.44285	1.29211	2.45138	2.64216	7.12655	10.1981	8.68676	9.24536	3.16645	2.09323	6.56696	0.210233	2.38332	2.16184	0.387133	5.23274	5.47987		462.067	201.521	183.838	362.155	2423.26	339.882	578.583	515.141	323.313	267.387	722.458	2559.86	2620.97	1420.75	3.16645	107.877	288.211	2.24099	538.113	38.7344	0.387133	107.52	66.197
2-Methylheptane		4.13418	4.43697	1.43916	3.23551	4.57846	3.22714	0.809347	1.25021	2.43876	2.70464	6.84555	9.80813	8.2984	9.02474	3.06328	1.86551	6.76153	0.182092	2.42948	2.03083	0.411758	5.15561	4.96757		436.206	191.872	175.031	336.052	2329.92	327.071	324.832	500.725	321.648	274.656	695.559	2459.41	2498.22	1386.77	3.06328	96.1339	296.75	1.84512	547.475	36.0186	0.411758	105.936	59.9505
[truncated: 23 more columns]

## Sheet: Diesel vehicles
		Diluted mixing ratios (ppb)																																		Actual sample mixing ratios (ppb)
		Three wheelers						Four wheelers												Heavy duty vehicles (HDV)																Three wheelers						Four wheelers
Compounds		ATUL Diesel auto 1	Piaggio Diesel auto 2	Mahindra Diesel auto 3	ATUL Diesel auto 4	Vikram Diesel Auto 5	Vikram Diesel Auto 6	dzire	Diesel Ertiga	Diesel Tavera	Diesel ETIOS	Diesel Innova	Diesel Ritz	C6 i20 Diesel	Mahindra Max Pickup diesel	FIAT Punto Diesel	Diesel Innova 2006	Diesel Ertiga	Diesel Indigo	tractor	bus	Diesel Traveller	SML Truck 1	EICHER Truck 2	Ashok Leyland Truck 3	Ashok Leyland Truck 4	Tata Truck 5	Eicher 6	Tata Truck 7	Tata Truck 8	Tata Truck 9	Tata Truck 10	Tata Truck 11	Tata Truck 12		ATUL Diesel auto 1	Piaggio Diesel auto 2	Mahindra Diesel auto 3	ATUL Diesel auto 4	Vikram Diesel Auto 5	Vikram Diesel Auto 6	dzire	Diesel Ertiga	Diesel Tavera	Diesel ETIOS	Diesel Innova	Diesel Ritz	C6 i20 Diesel	Mahindra Max Pickup diesel
Benzene		8.15269	6.8501	9.54003	9.85137	11.527	19.3398	17.9813	15.0767	14.5304	3.52052	19.6829	17.6761	13.5839	12.6639	29.6094	16.5494	18.6992	18.1655	29.4281	43.8669	12.9318	18.0205	15.0702	25.7293	8.75194	22.3379	9.54282	10.0542	21.1267	19.1249	23.0138	10.6387	12.4144		93.8434	231.939	258.951	157.502	184.161	310.057	376.292	240.033	588.579	61.6487	208.64	193.837	448.492	190.431
Toluene		3.43803	3.31636	3.28835	2.91433	6.56121	2.90997	7.54179	7.16714	5.93111	1.23107	5.79246	5.77724	4.8476	4.723	9.6541	5.7257	4.9613	4.09233	12.568	9.10846	5.33651	6.16349	6.87345	4.68061	4.25102	11.2137	6.28391	3.69893	9.39267	9.21193	10.6493	6.0618	3.22292		39.1065	110.79	89.3871	46.4593	101.269	43.9845	156.667	113.229	240.114	21.6646	60.8676	63.5497	159.869	72.0763
Styrene		0.81085	0.920478	1.05938	0.624022	2.10071	0.595035	2.31369	1.48897	2.10624	0.500169	1.34678	0.526178	0.804216	1.14666	1.35299	2.39312	1.0725	0.895601	4.00674	1.66058	1.69241	2.02389	2.59181	0.355981	2.06804	3.0645	2.7321	0.941256	1.24805	3.98379	4.13446	2.95086	0.896859		9.24545	30.993	28.9585	9.55218	30.8568	9.17129	44.5199	22.9401	85.3153	8.59566	13.9443	5.78796	26.6429	17.0658
m/p-Xylene		1.95426	2.17503	2.59255	1.52425	5.19408	1.20139	4.22475	2.82394	4.75141	1.43739	3.04471	0.501152	1.69737	3.16873	5.01003	7.60133	1.93855	0.312366	10.6591	3.24429	3.84916	5.25342	5.78127	0.453926	4.13743	5.58956	5.55498	1.86629	7.12513	8.30419	8.87096	5.66964	1.80334		21.2265	69.9672	69.0132	23.2897	72.8791	18.5235	84.3372	42.2982	190.664	25.1862	30.2934	5.2249	55.0221	46.5193
Ethylbenzene		1.24624	1.24603	1.38712	0.924128	2.0244	0.630183	2.14453	1.85527	2.85936	0.449539	1.31789	0.466136	1.13202	1.33701	2.63321	2.56387	0.914408	0.84616	5.00046	1.65292	2.08399	2.76065	3.69635	0.345579	2.6333	4.49351	3.58677	1.45548	4.08471	4.82227	4.9524	3.34487	1.22111		14.004	41.5368	37.3794	14.2884	30.0047	9.89957	42.8557	28.3222	115.585	7.91523	13.2603	4.81439	37.5028	20.6058
o-Xylene		1.69867	1.81666	4.02608	1.34418	4.79804	0.915919	1.46746	0.797497	5.56849	0.0588635	1.78998	0.0630348	0.127151	1.85777	1.10462	4.53307	0.239287	0.734644	7.94237	1.8743	4.7219	7.04145	6.8344	0.298634	8.56545	14.8786	8.73072	2.95523	12.6809	13.7908	14.6312	10.3098	3.65183		19.6723	59.3512	110.054	21.607	77.0641	14.0368	29.7529	12.5774	226.14	1.00395	18.9631	0.693382	4.21239	28.8178
m-Ethyltoluene		0.861814	0.878358	1.3438	0.578704	2.74845	0.511459	1.54681	0.883451	2.62204	0.488903	0.904125	0.181233	0.250155	1.12891	1.1061	1.57254	0.450256	0.425351	4.39421	1.09808	2.04326	2.50555	2.89111	0.139621	2.90496	1.05166	3.65082	1.09026	4.4247	5.2737	5.60843	3.61357	1.02589		9.00959	28.7075	35.6718	9.11733	41.9552	7.82726	30.1116	13.3573	105.58	8.6524	8.91908	1.99356	8.28739	17.1612
1,2,3-Trimethylbenzene		0.884225	0.912052	2.0282	0.583137	2.62378	0	1.59389	1.05779	3.03729	0.476143	1.34613	0.19548	0.145487	1.684	1.06661	2.62635	1.20161	0.526676	4.54391	1.09322	2.44511	3.92528	3.53778	0	7.34584	0.93186	3.67923	0	3.95498	5.15007	6.94182	4.18186	0.00107102		9.56275	30.2513	54.1058	9.23409	38.6574	0	31.547	15.8227	121.876	8.22323	13.6057	2.08797	4.75363	24.9588
o-Ethyltoluene		0.307022	0.427927	0.793146	0.279183	1.23923	0.264408	0.789885	0.479322	1.12381	0.260045	0.648464	0.0749245	0.10807	0.703501	0.362243	1.32056	0.554804	0.0819609	2.00474	0.535337	0.934387	1.46119	1.38277	0.0327526	1.31796	0.359485	1.18864	0.760944	1.72209	1.85482	2.08951	1.33049	0.425416		3.55563	13.9806	21.6808	4.55277	18.9304	4.17753	16.3372	7.32779	45.4601	4.61303	6.60955	0.784004	3.53925	10.3142
1,3,5-Trimethylbenzene		0.475767	0.519778	1.06251	0.432189	2.24369	0.528655	1.63065	1.54351	1.97802	0.264564	1.57115	0.40225	0.0913395	1.08999	0.95656	1.4502	1.06415	0.168193	2.43597	0.737034	1.65243	1.73284	2.0366	0.32965	3.45715	3.03312	4.78421	1.21342	5.52261	5.91309	6.63724	4.55193	1.39205		5.25056	16.9814	29.044	7.0479	35.9165	8.06518	32.4092	24.5235	80.0875	4.81124	16.3941	4.28137	3.02599	15.734
p-Ethyltoluene		0.324352	0.315367	0.470866	0.132405	1.5785	0.353972	0.626772	0.309421	0.930776	0.229714	0.284241	0.0914852	0.174025	0.480442	0.637725	0.833461	0.267181	0.326065	2.07976	0.369258	0.705971	0.95327	1.09552	0.10755	2.89312	3.9181	4.23186	1.17727	4.69772	5.81048	5.84054	4.29941	1.11786		3.75632	10.4152	12.3695	2.16792	24.995	5.31798	12.2963	4.67013	37.2423	4.1005	2.8612	1.00634	5.76528	7.40186
Isopropylbenzene		0.140217	0.261726	0.31958	0.069264	0.554323	0.135358	0.18453	0.267269	0.732092	0.0405871	0.239042	0.0517731	0.123633	0.266488	0.443594	0.497225	0.177823	0.0876361	0.322784	0.179491	0.589859	0.882756	1.0374	0.0323866	1.07423	3.11918	0.0665936	0	1.98438	2.51778	2.51289	0.0948352	0.541849		1.44589	8.55072	8.45492	1.11606	8.52692	2.06137	3.68258	4.02129	29.7746	0.738096	2.56871	0.569504	4.09583	4.02529
1,2,4-Trimethylbenzene		1.53768	1.60538	4.34455	0.999264	11.8346	1.64793	0.91146	0.704726	5.72145	0.021386	1.99987	0.261195	0.212801	2.34564	0.489592	4.2393	0.542681	0.879172	7.24034	1.58619	4.74971	8.64044	7.10883	0.554565	18.7484	17.2082	19.892	5.34081	29.7548	29.5899	31.33	20.6672	7.39189		17.6371	52.9909	118.094	16.3597	193.21	26.5155	18.9248	11.0898	231.196	0.3821	20.1154	2.87314	6.81741	36.3998
n-Propylbenzene		0.355232	0.38025	0.479608	0.207749	1.20092	0.243712	0.564166	0.413827	1.18751	0.11792	0.32311	0.0359035	0.232612	0.483526	0.638587	1.0775	0.26582	0.244093	1.89379	0.588066	1.21354	0.94876	1.70618	0.100116	1.59587	2.0246	2.57582	0.783483	2.70765	3.90704	3.72418	2.7648	0.698522		4.11395	12.423	13.1102	3.38785	19.037	3.68981	11.0471	6.31544	47.9962	2.07943	3.22309	0.396954	7.70622	7.14116
p-Diethylbenzene		0.66416	0.672608	0.635059	0.212884	3.5118	0.727079	1.09223	0.986235	2.53244	0.280518	0.749587	0.310232	0.123271	1.07486	0.772678	0.956778	1.00981	0.308809	3.5547	0.809819	1.90044	2.53124	2.6855	0.451665	5.32546	1.32864	8.12034	2.016	9.25748	10.4737	10.5273	4.67127	2.00972		7.69165	22.4103	16.9287	3.5233	58.6617	11.53	24.3294	15.2881	100.643	5.08566	7.84558	3.41255	4.08386	15.8234
m-Diethylbenzene		0.359192	0.353915	0.173377	0.063688	0.552125	0.148761	0.506967	0.314783	0.481021	0.109152	0.345343	0.0545302	0	0.173184	0.136513	1.34825	0.570794	0	1.88033	0.361168	0.272103	1.39864	1.53107	0.182678	1.00466	5.57378	0.850927	0.239306	1.424	1.09882	1.04959	0.737792	0.238037		3.76225	11.635	4.79461	1.03859	9.0887	2.32293	10.2788	4.83206	18.8421	1.95049	3.43843	0.599833	0	2.6708
Acetylene		29.6084	41.4501	38.8268	47.2005	51.5136	101.423	93.1505	63.1726	54.856	0	81.5368	40.8525	55.2726	62.1814	21.4622	103.54	7.43959	123.8	140.498	0	72.0531	63.9019	59.8478	116.335	44.0985	104.102	38.813	62.5846	96.7923	86.1086	105.127	57.4283	64.9847		342.895	1364.41	1061.34	769.72	847.981	1583.74	1888.63	1013.66	2231.02	0	842.38	449.377	1831.13	991.514
Ethene		59.6754	104.88	91.1453	60.8066	84.2568	67.6703	193.68	160.175	159.684	189.338	158.033	102.428	188.075	157.12	127.322	177.004	185.959	176.418	179.365	162.968	182.122	166.622	184.953	176.984	80.8522	164.548	69.9326	132.05	161.05	138.801	170.744	158.367	126.549		686.253	3511.89	2481.4	975.198	1320.24	1025.52	3901.13	2557.16	6476.99	3414.81	1693.58	1125.85	6215.44	2487.97
Propene		31.4372	47.2938	42.1765	29.0177	44.395	26.3289	78.7433	50.61	61.6353	2.03585	48.5145	85.0308	61.8353	47.7071	31.4262	61.6254	45.3868	64.0107	69.5043	69.763	60.8402	63.4021	67.21	78.9704	32.4064	59.8849	32.1439	54.0792	71.0976	62.6225	74.7845	52.8545	43.6019		363.271	1588.34	1150.67	469.477	721.479	401.757	1588.79	809.273	2501.89	36.4557	521.329	934.318	2047.11	755.996
trans-2-Butene		1.20917	1.61539	1.44828	1.09357	1.86026	0.946621	2.48153	0.459918	2.06071	0.0309255	1.21027	2.21719	2.22362	1.19929	1.77452	1.78405	3.34568	1.8317	2.42974	1.61942	1.8278	2.02061	2.2274	1.6788	1.48685	1.78629	0.924783	1.53663	2.04952	1.87588	3.01572	1.39988	1.10664		13.7372	52.5958	38.9553	16.8958	28.0878	14.4738	52.6691	6.9264	82.9264	0.53649	12.6262	24.2658	73.0168	17.7998
1-Butene		7.74881	11.5355	10.7241	6.95965	10.7163	4.51495	16.7451	1.74343	14.7928	0.0143378	9.96818	18.717	13.3433	10.2858	1.40903	13.1548	4.59576	14.3238	16.2676	16.6213	13.937	15.4861	16.1949	18.6344	7.55885	13.5188	6.94684	11.0529	15.7667	14.2328	17.5999	9.71745	8.56428		89.6416	376.87	292.816	112.912	175.507	70.1236	371.976	27.6973	601.13	0.245415	107.116	205.745	441.763	163.337
cis-2-Butene		0.876132	1.10027	1.04823	0.787905	1.14759	0.674891	1.78987	0.340411	1.49016	0.0217274	0.960169	1.76089	1.48592	0.881891	1.24594	1.25565	2.81917	1.33911	2.07907	1.20872	1.38644	1.47528	1.58627	1.21053	0.939227	1.25109	0.697267	1.10114	1.50425	1.36327	1.88825	0.992986	0.792368		10.1465	36.9714	28.6536	12.8487	18.4502	10.5041	39.8694	5.46218	60.6055	0.373396	9.78253	19.3698	49.2269	13.7563
isoprene		0.0409723	0.0649881	0.0417056	0.0255106	0.0842354	0.0274358	0.0292303	0.00825449	0.0534336	0.0154629	0.0184608	0.558796	0.010979	0.0277474	0.0158666	0.245803	0.0589741	0.362233	0.0497823	0.0448442	0.0311424	0.0368789	0.0543407	0.119582	0.0721858	0.141252	0.0552933	0.128103	0.189404	0.12883	0.12906	0.103533	0.0979023		0.48839	2.12721	1.12272	0.386567	1.3301	0.412916	0.651106	0.124803	2.16734	0.276314	0.198376	6.10205	0.356488	0.439374
trans-2-Pentene		0.485161	0.268441	0.581626	0.3769	0.743446	0.422238	0.946905	0.30677	0.971445	0.0122878	0.246535	0.879129	1.07526	0.380333	0.224592	0.68995	1.1603	0.792193	0.857544	0.448316	0.875708	0.972673	1.04275	0.382092	0.560502	0.852616	0.430522	0.650593	1.06052	0.990768	1.14988	0.563975	0.515077		5.61867	8.71688	15.8989	6.14627	12.024	6.67691	21.0923	4.92238	39.5092	0.211172	2.59136	9.67042	35.6223	6.0646
cis-2-Pentene		0.2388	0.247685	0.330683	0.242865	0.440731	0.245872	0.584169	0.238659	0.577292	0.008143	0.192092	0.606152	0.438966	0.23044	0.101546	0.446792	0.469883	0.494306	0.469919	0.363284	0.527155	0.605357	0.623972	0.204793	0.311011	0.511744	0.297757	0.399283	0.673451	0.64083	0.739245	0.32763	0.327376		2.76555	8.04784	9.03931	3.96051	7.25501	3.83933	13.0124	3.82949	23.4788	0.139942	2.09566	6.66767	14.5425	3.67448
1-Pentene		2.35841	3.05438	3.49869	1.97923	4.2611	1.88569	4.14662	1.22306	5.38294	0.00451094	2.76121	5.02964	2.89228	2.57749	0.102096	3.75816	0.282482	4.5227	3.48268	4.36925	4.90848	5.28673	5.87072	6.56653	2.90516	4.98185	2.11404	3.83361	6.01648	5.12965	6.10462	3.17964	2.99719		27.2489	99.2718	95.6375	32.0599	69.4771	28.9382	90.7148	19.6251	218.927	0.0775229	29.6716	55.326	95.8185	41.0994
1-hexene		2.4048	2.64557	2.87567	2.15238	0.912558	1.03429	2.10137	0.533022	4.53537	0.00505046	1.42782	0.0665767	0.00211887	0.0292161	1.35321	3.09133	0.0672595	0	4.0981	2.27587	4.04101	4.82656	4.92713	2.16451	0.692823	4.5168	1.90063	2.72572	5.23502	1.58751	5.00106	1.82389	2.38238		26.549	89.0777	78.6072	35.0998	15.0219	16.1505	46.8081	8.55279	184.456	0.0918451	14.8888	0.753575	0.0685453	0.465865
Ethane		3.04525	2.79925	2.81526	3.72824	7.03862	7.21383	9.91881	9.86169	8.1537	14.3206	10.033	8.58115	8.58546	7.41781	37.7533	10.3012	17.1254	13.5575	18.06	9.77401	8.9012	11.0396	8.60887	14.5125	5.19558	8.57449	6.49988	5.83155	12.4097	10.7809	13.4019	3.359	5.89915		34.0052	91.5347	74.3018	56.1996	107.183	110.961	205.396	158.239	322.314	267.442	103.694	90.1175	275.036	113.359
Propane		0.600639	0.34857	0.469353	0.578711	0.996752	0.705872	1.46827	1.06757	0.988849	1.28052	0.927801	1.51889	0.893654	0.684703	4.16447	1.60548	2.17863	3.23776	2.75817	1.40541	1.11095	1.33678	1.07524	2.48213	1.09376	1.3412	0.967692	0.867285	1.82027	1.63119	2.40868	0.440952	0.884933		6.95602	11.7365	12.8299	9.4373	16.4078	11.0223	32.7057	17.1301	40.217	23.2869	9.97	16.6729	29.6059	10.9179
n-Butane		0.379724	0.170716	0.170407	0.171495	0.469041	0.368922	0.398394	0.249767	0.214838	0.265104	0.202426	0.521692	0.208527	0.171164	1.58784	0.274402	0.911633	0.26422	0.789653	0.32349	0.24805	0.284553	0.261175	0.475467	0.945924	0.403644	0.374677	0.29669	0.512274	0.32437	1.16279	0.252417	0.261078		4.32293	5.7481	4.65811	2.79665	7.72102	5.76076	8.87423	4.00773	8.73756	4.82105	2.17524	5.4471	6.90829	2.7293
Isobutane/ 2-Methylpropane		0.213726	0.0789816	0.0796417	0.087352	0.134344	0.155306	0.139461	0.0960058	0.0557136	0.097063	0.0767934	0.230714	0.0734817	0.0661491	0.596236	0.102127	0.312864	0.164173	0.479913	0.115447	0.065068	0.0871904	0.0607127	0.156776	0.557014	0.168047	0.129635	0.0959542	0.147415	0.0769955	0.489117	0.0601389	0.0677516		2.35923	2.65935	2.17703	1.42449	2.18996	2.42991	3.10649	1.54049	2.2659	1.76514	0.82521	2.53785	2.45093	1.05478
Cyclopentane		0.115453	0.0630629	0.0413372	0.0753126	0.0786181	0.0812974	0.359543	0.198804	0.106416	0.135151	0.0654756	0.142108	0.124117	0	0.874876	0.17524	0.351438	0.070725	0.27056	0.180907	0.112784	0.0578563	0.118832	0.159724	0.125082	0.250636	0.149892	0.0796814	0.198137	0.17491	0.298358	0.108409	0.0888671		1.33707	2.12336	1.12996	1.22816	1.29416	1.26947	7.56152	3.18998	4.32802	2.45779	0.703591	1.56318	4.06101	0
Isopentane/2-Methylbutane		0.738338	0.221982	0.241234	0.388697	0.490412	0.711373	1.5525	0.298377	0.151408	0.325671	0.130167	0.826631	0.315334	0.357337	3.6404	0.410598	2.42718	0.346757	0.652991	0.372929	0.173569	0.130549	0.261987	0.347185	0.606089	0.424857	0.348411	0.169211	0.617252	0.297579	1.04633	0.478533	0.359457		8.55071	7.47424	6.5942	6.33866	8.03092	11.3998	34.582	4.78771	6.15783	5.9225	1.39876	8.92013	10.4467	5.30901
n-Pentane		0.315032	0.0995948	0.113995	0.198155	0.386105	0.340621	0.787166	0.421669	0.248146	0.120769	0.148997	0.433305	0.297071	0.162071	2.10433	0.387491	1.56625	0.203455	0.621754	0.399455	0.271438	0.186907	0.365639	0.407122	0.485438	0.408064	0.295056	0.13687	0.651653	0.332234	0.631234	0.226729	0.214468		3.6484	3.37333	3.11608	3.23141	6.48282	5.44234	17.5342	6.76603	10.0922	2.19625	1.52813	4.76636	9.84169	2.49779
Cyclohexane		0.310867	0.278671	0.272185	0.230945	0.307282	0.185251	1.00773	1.85108	0.887119	0.0943131	0.941819	0.812512	0.824486	0.51817	4.92022	1.11774	1.13575	0.261509	1.17531	0.865233	0.762159	0.539023	0.835883	1.0662	0.771819	2.11108	1.34614	0.583938	1.22982	1.72299	2.38968	0.943824	0.825004		3.60016	9.38299	7.44024	3.76613	4.73102	2.94158	22.4472	29.7021	36.0796	1.71513	10.1206	8.93764	27.3144	8.26248
Methylcyclopentane		0.295003	0.305628	0.361237	0	0.46897	0.109775	0.946082	0	0.737752	0.131794	0.705126	0	0.782827	0.362268	4.54114	0.913183	0.993964	0.0886301	0.833375	0	0.625518	0.390448	0.614677	1.09169	0.639054	1.86841	1.51687	0.562779	1.49342	1.95012	2.7632	0.938842	0.807973		3.41644	10.2907	9.8745	0	7.34845	1.72976	20.1047	0	30.0048	2.39674	7.57718	0	25.9343	5.77655
2,2-Dimethylbutane		0.261296	0.0825077	0.0801422	0.148256	0.0903509	0.157201	0.547099	0.095693	0.0384537	0.226517	0.0478671	0.192016	0.0699137	0.101208	0.757662	0.117993	0.863416	0.0610382	0.206033	0.0814131	0.0400553	0.0110035	0.0518306	0.0917216	0.142921	0.129611	0.13676	0.0582195	0.147834	0.118325	0.307069	0.141951	0.0903077		3.02608	2.77808	2.19071	2.41767	1.48995	2.52527	11.7877	1.53547	1.56393	4.11934	0.514372	1.96112	2.28109	1.50512
2,3-Dimethylbutane		0.0700312	0.0314075	0.0238008	0.0415022	0.0402688	0.0519234	0.165454	0.104634	0.0493424	0.0318127	0.0391277	0.0725291	0.055498	0.0401333	0.391488	0.0903399	0.242566	0.0259206	0.389767	0.0614454	0.0438105	0.0236631	0.0516994	0.0576764	0.0660798	0.0999157	0.0656345	0.0295722	0.0719659	0.103436	0.155909	0.0630086	0.0444081		0.811032	1.05751	0.650602	0.676795	0.629643	0.817296	3.6855	1.67894	2.00678	0.578531	0.42046	0.779523	1.8386	0.639945
n-Hexane		0.416403	0.400801	0.244836	0.29288	0.562705	0.329503	1.1211	1.77438	1.01724	0.0555966	0.874675	1.05543	0.414669	1.52144	0.011349	0.0230546	1.65671	0.83686	1.28911	0.847413	0.920314	0.579611	1.086	0.508868	0.945713	1.96999	1.33037	0.649411	2.00994	1.92784	2.69582	1.00938	0.905194		4.59709	13.4952	6.6897	4.78346	9.21586	5.20424	23.3907	27.5947	40.3196	1.08469	9.39912	11.6097	13.7376	24.2602
2-Methylpentane		0.224519	0.037451	0.0738035	0.130028	0.243861	0.174383	0.570603	0.560697	0.253024	0.0549868	0.095426	0.332318	0.254741	0.189535	1.80586	0.419535	0.883664	0.0875757	0.369206	0.280404	0.229738	0.113707	0.278417	0.202298	0.328404	0.537882	0.384832	0.179927	0.609562	0.626727	0.815744	0.364317	0.239202		2.46514	1.26284	2.00091	2.08854	3.83082	2.75796	11.7052	8.45665	10.1105	0.995675	1.00544	3.6555	8.39242	2.87206
3-Methylpentane		0.129253	0.0930196	0.0619632	0.0899642	0.0889348	0.105484	0.352343	0.428345	0.214659	0.048261	0.196554	0.23939	0.218684	0.131622	1.38312	0.292084	0.457084	0	0.351	0.239971	0.185462	0.104104	0.198644	0.199054	0.206473	0.45691	0.311207	0.13502	0.391933	0.422553	0.585816	0.223376	0.177037		1.49689	3.13202	1.69378	1.46709	1.4467	1.63025	7.84845	6.87315	8.73028	0.877651	2.11213	2.63329	7.24478	2.03927
3-Methylhexane		0.398241	0.904633	0.481435	0.528261	0.732221	0.264885	1.13695	1.23078	0.866309	0	1.12404	0.39409	0.55988	0.563861	3.12621	1.74935	0.81461	0.64491	1.68375	0.747818	0.625156	0.76328	1.03974	0.174434	1.02315	2.11188	1.43082	0.640312	2.00321	2.11415	2.49381	1.14263	1.10569		4.23875	30.3236	12.7034	8.55065	11.4338	4.09573	23.1482	18.9469	34.2945	0	11.6189	4.29747	18.3385	8.75871
2-Methylhexane		0.285995	0.197563	0.216955	0.196599	0.551832	0.187536	0.489379	0.660474	0.612414	0.0317191	0.476972	0.148888	0.264934	0.317015	2.2051	0.696307	0.461907	0.128311	0.711412	0.306508	0.614677	0.445661	0.722413	0.073118	0.715254	1.48527	0.987548	0.437903	1.41076	1.5359	1.91318	0.825849	0.728219		2.84027	6.47095	5.64414	3.29225	8.96442	2.94554	9.74748	9.84594	24.0809	0.58072	4.68198	1.63777	8.59091	4.83282
2,3-Dimethylpentane		0.0983996	0.07361	0.089579	0.0744686	0.173597	0.0684021	0.262199	0.414758	0.23516	0.0212991	0.337182	0.146723	0.232536	0.183236	1.06237	0.281971	0.459009	0.398161	0.0996256	0.206836	0.253576	0.214164	0.323116	0.0980221	0.246674	0.517228	0.337691	0.140531	0.488081	0.487406	0.608497	0.276378	0.277128		1.13957	2.47849	2.44867	1.21439	2.74128	1.02628	5.8405	6.65515	9.5641	0.387335	3.6233	1.61395	7.70369	2.92179
2,4-Dimethylpentane		0.0461781	0.0833986	0	0.0777892	0.103853	0.0517343	0.0832631	0.0858808	0.0648153	0	0	0	0.069017	0.0365794	0.266757	0.142896	0.134036	0.0534812	0.132272	0.0475073	0.0466883	0.0384888	0.0658726	0.0468137	0.152436	0.194842	0.200007	0.108866	0.17928	0.223726	0.279543	0.130934	0.127833		0.456718	2.80808	0	1.26854	1.70955	0.807839	1.76407	1.33329	2.63607	0	0	0	2.2574	0.580554
n-Heptane		0.647455	0.951809	1.57159	0.642168	1.97642	0.640663	1.0876	1.45061	1.71794	0.0560571	2.52248	0.444692	0.37487	1.40773	5.61857	2.06847	0.885845	1.23681	2.35237	1.21972	2.07264	3.21125	2.88698	0.190967	2.61978	5.10031	3.62097	1.34696	4.8974	4.5038	5.50006	2.76592	2.84496		7.49819	30.5944	43.3082	10.2885	31.0165	9.85856	24.2262	23.2763	69.8696	1.01943	27.1062	4.89161	12.4191	21.7423
n-Octane		1.39852	1.48033	3.87234	1.09291	3.56918	0.854283	1.78288	1.45316	4.05949	0.113648	2.60509	0.173864	0.580413	2.14088	5.26176	3.593	0.533688	1.34606	6.39382	1.8118	3.99085	6.42056	5.5819	0.26707	5.2406	11.3413	6.87141	2.55957	9.30195	9.94635	11.0398	7.35179	3.66722		16.1963	48.2731	105.852	17.8226	57.4518	13.4654	38.8954	23.3171	165.102	2.06674	27.9938	1.76936	19.2285	31.9664
3-Methylheptane		0.275114	0.170944	0.726801	0.0411467	1.54927	0.258052	0.406105	0.399141	0.96671	0.0341248	0.591564	0.0179193	0.0650004	0.480784	1.56058	1.25217	0.141834	0.166699	1.06415	0.353609	0.907239	1.24512	1.20485	0.048548	1.17093	2.89928	1.75619	0.636652	2.23382	2.46516	3.07114	1.77896	0.863603		2.62825	5.65284	16.9438	0.676904	24.7604	4.06494	8.60489	6.40455	38.679	0.620578	6.35686	0.190029	2.1534	7.66635
2-Methylheptane		0.504009	0.49492	1.51832	0.367527	1.9109	0.422483	0.68749	0.562312	1.46107	0.0537173	1.29145	0.0836105	0.0541113	0.855204	1.87384	1.65762	0.0912503	0.180444	2.09687	0.656136	1.43255	2.38182	1.93822	0.0632335	1.83321	4.07256	2.57507	1.01005	3.5249	3.79628	4.60582	2.541	1.60304		5.69572	16.5	41.5036	6.03652	30.7868	6.40558	14.5177	8.98528	59.0305	0.985651	13.1895	0.916016	1.76218	13.2158
[truncated: 52 more columns]

## Sheet: LPG vehicles
	Diluted mixing ratios (ppb)										Actual sample mixing ratios (ppb)										measurement uncertainty to actual sample mixing ratios (ppb)
Compounds	Bajaj LPG Auto 1	Piaggio LPG Auto 2	Bajaj LPG Auto 3	Bajaj LPG Auto 4	Bajaj LPG Auto 5	Bajaj LPG Auto 6	Piaggio LPG Auto 7	Bajaj LPG Auto 8	Piaggio LPG Auto 9		Bajaj LPG Auto 1	Piaggio LPG Auto 2	Bajaj LPG Auto 3	Bajaj LPG Auto 4	Bajaj LPG Auto 5	Bajaj LPG Auto 6	Piaggio LPG Auto 7	Bajaj LPG Auto 8	Piaggio LPG Auto 9		Bajaj LPG Auto 1	Piaggio LPG Auto 2	Bajaj LPG Auto 3	Bajaj LPG Auto 4	Bajaj LPG Auto 5	Bajaj LPG Auto 6	Piaggio LPG Auto 7	Bajaj LPG Auto 8	Piaggio LPG Auto 9
Benzene	12.7277	6.48547	10.2562	7.10514	21.3622	6.69922	5.9137	3.24865	2.97975		12.7277	69.8084	111.344	7.10514	21.3622	6.69922	5.9137	3.24865	2.97975		0.732148	4.01565	6.619	0.422375	1.2306	0.413199	0.367918	0.219528	0.20546
Toluene	7.57635	11.5517	8.31398	1.08405	0	4.06647	2.37327	1.15908	1.8222		7.57635	124.808	91.4043	1.08405	0	4.06647	2.37327	1.15908	1.8222		0.442169	7.284	5.54768	0.0657954	0.269504	0.646412	0.587424	0.562529	0.574138
Styrene	1.1775	1.17979	1.00038	0.761253	3.99827	1.99652	1.4289	0.791445	0.844409		1.1775	12.8274	10.9708	0.761253	3.99827	1.99652	1.4289	0.791445	0.844409		0.0813151	0.885826	0.653109	0.0453186	0.26731	0.233787	0.207998	0.187001	0.188354
m/p-Xylene	2.31038	3.62187	2.84029	1.73057	11.2828	1.97479	1.06972	0.043196	0.342049		2.31038	36.3765	28.4092	1.73057	11.2828	1.97479	1.06972	0.043196	0.342049		0.162461	2.55792	1.69905	0.103499	0.745572	0.293957	0.263769	0.250186	0.251588
Ethylbenzene	1.94279	3.27611	2.30386	0.821	6.15517	2.69145	1.78293	0.875079	0.830722		1.94279	35.4778	23.3022	0.821	6.15517	2.69145	1.78293	0.875079	0.830722		0.125772	2.29676	1.37768	0.0485395	0.390863	0.210588	0.155476	0.11044	0.108727
o-Xylene	0.414797	0.742304	0.204886	0.344958	0.961189	5.63011	3.1111	1.94254	1.35504		0.414797	8.22267	2.2469	0.344958	0.961189	5.63011	3.1111	1.94254	1.35504		0.0239027	0.473832	0.134278	0.0206152	0.0586385	0.444764	0.248559	0.159053	0.115451
m-Ethyltoluene	0.403004	0.207723	0.546703	1.07931	2.21102	3.63737	1.80192	0.819633	0.572397		0.403004	2.13583	5.99548	1.07931	2.21102	3.63737	1.80192	0.819633	0.572397		0.0346209	0.183483	0.410074	0.0738218	0.190469	0.300527	0.164979	0.104606	0.093634
1,2,3-Trimethylbenzene	0.450303	0.151778	0.183052	0.217135	1.74733	0	0	0	0		0.450303	1.54261	1.93729	0.217135	1.74733	0	0	0	0		0.0507409	0.173824	0.207267	0.0232308	0.196104	0	0	0	0
o-Ethyltoluene	0.311845	0.171843	0.172117	0.248847	1.97371	2.69777	0.914595	0.57976	0.189358		0.311845	1.81231	1.88754	0.248847	1.97371	2.69777	0.914595	0.57976	0.189358		0.0273861	0.159156	0.133193	0.0175597	0.169048	0.263333	0.0980212	0.0704837	0.0467267
1,3,5-Trimethylbenzene	0.365788	0.279286	0.231939	0.294314	1.70162	1.01564	0.908895	0.404079	0.546439		0.365788	2.85703	2.54358	0.294314	1.70162	1.01564	0.908895	0.404079	0.546439		0.0326397	0.254936	0.186793	0.0216135	0.146543	0.0831939	0.0759114	0.0449921	0.0527965
p-Ethyltoluene	0	0	0.283384	0.562008	1.07299	2.15897	0.885996	0.536573	0.430561		0	0	3.10776	0.562008	1.07299	2.15897	0.885996	0.536573	0.430561		0	0	0.232223	0.0419953	0.0941383	0.165768	0.0776077	0.0571966	0.0519993
Isopropylbenzene	0.220615	0	0.122907	0	1.07824	0.401485	0.316477	0.210814	0.0203954		0.220615	0	1.34787	0	1.07824	0.401485	0.316477	0.210814	0.0203954		0.0144178	0	0.0780691	0	0.0675396	0.0287496	0.0232606	0.0167463	0.00863147
1,2,4-Trimethylbenzene	0.13189	0.0131877	0.0360946	0	0.150555	8.72254	5.80915	3.85045	3.31595		0.13189	0.138624	0.371049	0	0.150555	8.72254	5.80915	3.85045	3.31595		0.0116371	0.0122313	0.026243	0	0.017573	0.587652	0.417236	0.312336	0.286461
n-Propylbenzene	0.37922	0.207018	0.146319	0.331598	1.36738	2.41631	1.53263	0.963108	0.734376		0.37922	2.12062	1.60462	0.331598	1.36738	2.41631	1.53263	0.963108	0.734376		0.0299107	0.167262	0.104444	0.0215835	0.103787	0.190233	0.122302	0.0794372	0.0628334
p-Diethylbenzene	0.412514	0.270307	0.210528	0.657095	2.03253	0	2.25565	2.44892	1.48639		0.412514	2.75663	2.30878	0.657095	2.03253	0	2.25565	2.44892	1.48639		0.0603898	0.403556	0.300762	0.0855991	0.209845	0	0.162003	0.175105	0.110726
m-Diethylbenzene	0.448227	0.194025	0.138584	0.145254	0.738432	0	0.465925	0.321733	0.391341		0.448227	1.99831	1.5198	0.145254	0.738432	0	0.465925	0.321733	0.391341		0.0550213	0.245299	0.164675	0.0157388	0.0707292	0	0.0361451	0.0253339	0.0305334
Acetylene	175.946	0.595828	2.15277	110.891	1.99498	33.4348	18.7454	43.863	14.4742		5394.44	713.49	1295.68	8409.61	799.474	3405.92	15018.2	4468.22	171.774		315.04	41.6684	105.381	683.976	67.4979	216.939	956.574	284.601	10.9498
Ethene	139.529	12.5498	7.68315	97.9166	6.29948	53.0844	18.2526	68.6311	2.16997		4206.86	15119.2	4648.05	7297.02	2532.23	5412.83	14625.2	6998.08	25.9671		242.246	870.62	557.73	875.586	190.941	319.214	862.5	412.701	1.55152
Propene	156.029	20.0293	6.78383	73.3359	61.3999	209.132	171.041	191.726	78.281		4724.79	24133.3	4094.33	5542.31	24737.2	21235.8	137268	19468.3	903.552		272.115	1389.91	235.939	319.38	1433.6	1229.27	7946	1126.96	52.304
trans-2-Butene	56.7987	51.8809	69.736	51.8213	35.5326	137.196	96.4093	110.326	36.5954		1715.8	62514.5	41940.5	3917.38	14237.4	13914.1	77269.7	11189	417.83		102.249	3725.42	2440.09	227.913	833.017	804.946	4470.15	647.297	24.1721
1-Butene	34.4493	36.4065	18.0609	20.9992	34.5837	127.124	91.3713	104.463	29.0231		1050.13	43868.3	10863.9	1589.05	13853.8	12904.7	73198.6	10604.3	334.114		60.6775	2534.75	625.84	91.5413	798.348	748.421	4245.24	615.008	19.3775
cis-2-Butene	34.9661	29.6775	58.5162	28.1351	24.7342	54.3361	37.7938	44.725	18.6953		1072.05	35760.4	35349.5	2133.67	9908.66	5493.27	30309.9	4521.61	207.482		61.7549	2059.96	2041.46	123.221	570.792	318.522	1757.49	262.181	12.0307
isoprene	0.298289	0.0718172	4.84388	0.320793	4.65016	3.35862	0.387841	1.95341	0.553419		8.97254	86.4343	53.1209	17.1271	4.65016	3.35862	310.648	1.95341	0.553419		0.516681	4.97729	3.17094	1.02236	0.269044	0.232342	20.4097	0.14752	0.0813224
trans-2-Pentene	1.03779	0.215889	0.302622	0.378693	0.113996	8.7696	0.163227	5.04128	4.6674		31.8181	260.139	182.522	28.7188	45.6828	8.7696	130.604	5.04128	4.6674		1.82833	14.9481	10.557	1.66109	2.62865	0.512934	7.59829	0.298037	0.27666
cis-2-Pentene	0.807093	0.128932	0.153635	0.298604	0.0698186	6.66598	0.09979	3.82906	3.17871		24.7451	155.359	92.3276	22.6451	27.9793	6.66598	79.9274	3.82906	3.17871		1.42226	8.92946	5.34224	1.31029	1.60962	0.389359	4.65656	0.224826	0.187291
1-Pentene	0.330003	0.374132	0.929165	0.200874	0.211791	5.35048	0.175473	2.16042	1.02968		10.1177	450.746	562.114	15.2336	84.8737	5.35048	140.548	2.16042	1.02968		0.581544	25.9078	32.3401	0.876437	4.87653	0.311626	8.16515	0.127453	0.0637973
1-hexene	0.719634	1.07556	1.95915	0.267685	7.609	1.9654	0	1.66365	1.85974		0.719634	10.8417	21.4852	20.3227	7.609	1.9654	0	1.66365	1.85974		1.73261	4.6148	1.24288	1.17564	0.765321	0.142565	7.30379	0.140442	0.140243
Ethane	54.7812	25.3882	1.94141	35.9516	6.50326	19.1697	25.7695	26.0593	15.7284		1633.52	30590.3	1173.59	2692.47	2603.01	1945.77	20654.3	2619.02	180.914		117.009	2191.17	82.4368	189.128	159.748	113.226	1201.89	152.403	10.5287
Propane	81.5898	118.259	3.05258	86.5544	168.305	171.004	129.275	150.896	40.8793		2501.51	142498	1846.71	6564	67402.6	17436.7	103804	15235.5	489.186		144.598	8236.97	106.642	379.052	3914.55	1014.92	6041.99	886.798	28.474
n-Butane	180.926	180.769	163.012	143.264	91.8613	130.446	130.233	127.908	46.3475		5547.12	217820	98688.1	10856.1	36791.4	13045.4	104500	12842.7	528.631		318.706	12514.7	5690.51	625.977	2134.48	754.164	6041.2	742.448	30.562
Isobutane/ 2-Methylpropane	120.721	120.99	52.2192	90.7696	43.527	138.12	113.895	119.607	42.275		3701.25	145789	31554.3	6881.14	17421.5	13848.7	91374	11992.4	476.241		213.263	8400.23	1821.37	397.191	1010.56	799.878	5277.62	692.664	27.5073
Cyclopentane	0.913788	93.1532	32.0642	0.026024	0.544804	0	0.0479946	0	0.162697		0.913788	992.975	19379	1.97357	0.544804	0	38.4621	0	0.162697		0.0567346	61.6511	1218.56	0.124098	0.0522051	0	2.27319	0	0.0680452
Isopentane/2-Methylbutane	7.99167	6.80064	15.1818	5.57635	4.70557	6.2293	5.1234	5.44466	2.44198		245.021	8194.55	9173.82	422.892	1884.45	624.583	4105.2	545.91	27.5097		17.8126	595.73	759.822	35.0261	108.333	36.1434	237.457	31.5951	1.92217
n-Pentane	0.827832	89.6657	2.30249	0.79982	0.320349	0.236285	0.378365	0.200836	1.28503		25.381	955.799	1387.17	60.6557	127.179	23.7378	303.624	20.1766	1.28503		1.45873	54.9331	80.0213	3.49904	7.30718	1.4327	17.7433	1.23238	0.36706
Cyclohexane	0.206319	34.6833	0.493543	5.89402	20.8261	0.926119	0.0112159	0.833757	0.332958		6.32567	369.71	298.577	5.89402	20.8261	0.926119	2.25439	0.833757	0.332958		0.364816	21.322	17.1995	0.339525	1.32426	0.0978656	0.157339	0.094835	0.083033
Methylcyclopentane	0	4.05132	0	0.587734	2.33771	0	0	0	0		0	43.1854	0	0.587734	2.33771	0	0	0	0		0	2.48845	0	0.0339355	0.142802	0	0	0	0
2,2-Dimethylbutane	3.03111	30.3922	3.88733	3.64332	3.03849	0.419359	0.111811	0.0784829	0.266076		3.03111	309.728	42.6308	3.64332	3.03849	0.419359	89.6689	0.0784829	0.266076		0.175205	17.9029	2.46026	0.210259	0.181656	0.292675	5.36169	0.29164	0.292034
2,3-Dimethylbutane	0.671859	7.84656	1.82055	1.23973	2.4471	0.143634	0.0341511	0.0440733	0.29109		0.671859	83.6411	19.9652	1.23973	2.4471	0.143634	27.3539	0.0440733	0.29109		0.0386364	4.80992	1.15832	0.071925	0.142571	0.0850449	1.60769	0.0846655	0.0863334
n-Hexane	30.1422	8.0665	0.115296	1.14959	13.186	0.45587	0.15502	0.184509	0.133994		30.1422	80.2834	1.26441	1.14959	13.186	0.45587	124.182	0.184509	0.133994		0.0413573	0.62307	0.0727919	0.0661821	0.44384	0.118912	0	0.100727	0.112543
2-Methylpentane	1.71282	20.2447	7.15021	1.86193	11.1686	0.847357	0.0950448	0.659538	0.135331		1.71282	199.3	74.2421	1.86193	11.1686	0.847357	76.2623	0.659538	0.135331		0.0984694	11.4577	4.3304	0.108603	0.651295	0.237033	4.45277	0.234994	0.23196
3-Methylpentane	0.925036	7.9389	4.07234	2.32584	6.26274	0.215095	0.0571898	0.062139	0.0518708		0.925036	84.6254	44.6597	2.32584	6.26274	0.215095	45.8071	0.062139	0.0518708		0.0532063	4.8675	2.57529	0.134119	0.366264	0.0958463	2.6816	0.0950861	0.095065
3-Methylhexane	1.79121	4.74602	1.83421	0.48881	4.84781	30.5448	0.0216164	9.53061	6.66515		1.79121	47.7781	19.9935	0.48881	4.84781	30.5448	17.3126	9.53061	6.66515		0.102902	2.74476	1.15358	0.0282032	0.289871	1.8756	1.06468	0.589088	0.415077
2-Methylhexane	0.676398	3.04942	1.20074	0.276734	2.10468	0.19266	0.0471261	0.846124	0.861402		0.676398	31.7662	13.1469	0.276734	2.10468	0.19266	0.0471261	0.846124	0.861402		0.0388603	1.82503	0.757242	0.0159395	0.124854	0.0666858	0.065536	0.0860467	0.0867045
2,3-Dimethylpentane	0.322056	1.30789	0.455204	0.554667	0	0	0	0	0		0.322056	13.9415	4.99204	0.554667	0	0	0	0	0		0.0185118	0.801359	0.288501	0.0320554	0.00381167	0	0	0	0
2,4-Dimethylpentane	0	0	0	0	0	0	0.272602	0.252408	0.22649		0	0	3.67163	0	1.70962	0.610946	0.272602	0.252408	0.22649		0	0	0.21356	0	0.0996048	0.0422577	0.0265093	0.0257747	0.0248871
n-Heptane	1.74222	3.89366	1.80194	0.669148	5.11185	1.26691	1.00404	0.594481	0.488934		1.74222	38.9452	19.7612	0.669148	5.11185	1.26691	1.00404	0.594481	0.488934		0.101371	2.26603	1.14466	0.0387601	0.311498	0.107364	0.096001	0.081743	0.0789891
n-Octane	0.976157	4.94175	2.04675	1.34294	2.34999	1.91624	1.33189	0.656894	0.529892		0.976157	52.677	22.4459	1.34294	2.34999	1.91624	1.33189	0.656894	0.529892		0.056131	3.02904	1.32397	0.0792129	0.146463	0.148141	0.107226	0.0640922	0.0572547
3-Methylheptane	0	3.69807	2.12994	0.425064	2.17072	0.824424	0.851843	0.29173	0.128653		0	39.4199	23.3582	0.425064	2.17072	0.824424	0.851843	0.29173	0.128653		0	2.27537	1.41039	0.0256658	0.132068	0.0645443	0.0664313	0.0311265	0.0244995
2-Methylheptane	0.642702	1.41228	0.647787	0.215393	2.91253	0.736184	0.424099	0.292685	0.256831		0.642702	14.3105	7.13492	0.215393	2.91253	0.736184	0.424099	0.292685	0.256831		0.0369497	0.822726	0.416356	0.0125692	0.176594	0.0548648	0.0368304	0.0304353	0.0289194
	*Since some compounds are very high in these samples, therefore compounds like n-butane, i-butane, propane, i-pentane, n-pentane, acetylene, ethene, propene, trans-butene, cis-2-butene and 1-butene were measured at higher dilutions as compared to the rest of the compounds

## Sheet: CNG Vehicles
	Diluted mixing ratios (ppb)								Actual mixing ratios (ppb)								measurement uncertainty to actual sample mixing ratios (ppb)
Compounds	Bajaj CNG Auto	Bajaj CNG Auto 2	Bajaj CNG Auto 3	Bajaj CNG Auto 4	Bajaj CNG Auto 5	Bajaj CNG Auto 6	CNG WgonR		Bajaj CNG Auto	Bajaj CNG Auto 2	Bajaj CNG Auto 3	Bajaj CNG Auto 4	Bajaj CNG Auto 5	Bajaj CNG Auto 6	CNG WgonR		Bajaj CNG Auto	Bajaj CNG Auto 2	Bajaj CNG Auto 3	Bajaj CNG Auto 4	Bajaj CNG Auto 5	Bajaj CNG Auto 6	CNG WgonR
Benzene	1.1135	0.871496	1.08962	0.894501	1.22091	0.770773	8.80104		1.1135	0.871496	1.08962	0.894501	1.22091	0.770773	8.80104		0.064053	0.0518072	0.0647741	0.0531748	0.0844179	0.0644638	0.529662
Toluene	6.3869	10.0218	10.2764	10.4049	33.404	5.87581	26.8307		6.3869	10.0218	10.2764	10.4049	33.404	5.87581	26.8307		0.37275	0.608263	0.623712	0.631512	1.95952	0.434961	2.19935
Styrene	2.95494	2.15217	2.89548	2.08657	1.66165	0.988099	10.8543		2.95494	2.15217	2.89548	2.08657	1.66165	0.988099	10.8543		0.204061	0.128122	0.172373	0.124217	0.141815	0.114816	0.831676
m/p-Xylene	3.44176	5.15444	4.74975	5.07995	6.04628	2.54233	11.051		3.44176	5.15444	4.74975	5.07995	6.04628	2.54233	11.051		0.242018	0.308268	0.284065	0.303813	0.454299	0.300803	0.866155
Ethylbenzene	1.89868	1.572	1.63917	1.91305	2.68045	1.25047	11.2718		1.89868	1.572	1.63917	1.91305	2.68045	1.25047	11.2718		0.122917	0.0929402	0.0969117	0.113104	0.18619	0.114203	0.802483
o-Xylene	1.01857	0.498442	0.893723	0.454233	0.25046	0.132815	25.9698		1.01857	0.498442	0.893723	0.454233	0.25046	0.132815	25.9698		0.0586951	0.0297876	0.0534101	0.0271456	0.0171369	0.0113582	2.0413
m-Ethyltoluene	0.0771717	1.78713	2.40983	2.02238	1.2265	0.311439	6.32941		0.0771717	1.78713	2.40983	2.02238	1.2265	0.311439	6.32941		0.00662959	0.122235	0.164825	0.138325	0.12293	0.0794357	0.504022
1,2,3-Trimethylbenzene	2.77408	2.09618	1.37108	0.607528	0.871394	0.598696	0		2.77408	2.09618	1.37108	0.607528	0.871394	0.598696	0		0.312589	0.224267	0.146689	0.0649983	0.127006	0.110583	0
o-Ethyltoluene	1.25673	0.418527	0.694181	0.286161	0.533611	0.637388	2.95019		1.25673	0.418527	0.694181	0.286161	0.533611	0.637388	2.95019		0.110365	0.0295332	0.0489846	0.0201928	0.0646962	0.0707566	0.28486
1,3,5-Trimethylbenzene	1.00162	1.15291	1.34852	1.06769	0.670156	0.589269	6.73593		1.00162	1.15291	1.34852	1.06769	0.670156	0.589269	6.73593		0.0893759	0.0846662	0.0990317	0.0784083	0.068952	0.0637033	0.505981
p-Ethyltoluene	0	1.17249	1.38754	1.18129	0.647251	0.0192188	4.80914		0	1.17249	1.38754	1.18129	0.647251	0.0192188	4.80914		0	0.0876128	0.103682	0.0882705	0.0636119	0.035977	0.35833
Isopropylbenzene	2.54639	0	0	0	0.937702	0	2.97111		2.54639	0	0	0	0.937702	0	2.97111		0.166413	0	0	0	0.0588546	0	0.203256
1,2,4-Trimethylbenzene	13.8243	0.141922	0	0.129335	0.25754	0	0.539651		13.8243	0.141922	0	0.129335	0.25754	0	41.1567		1.21977	0.0100376	0	0.00914741	0.024301	0	2.61781
n-Propylbenzene	4.57619	0.738152	0.95396	1.0325	0.515879	0.257744	8.39649		4.57619	0.738152	0.95396	1.0325	0.515879	0.257744	8.39649		0.360943	0.0480458	0.0620926	0.0672046	0.0444079	0.0296009	0.655012
p-Diethylbenzene	1.61367	1.56859	1.34102	0.92098	0.673482	0.552253	14.4233		1.61367	1.56859	1.34102	0.92098	0.673482	0.552253	14.4233		0.236232	0.204338	0.174693	0.119975	0.0791647	0.0688551	1.00548
m-Diethylbenzene	2.77136	0	0	0.209018	0.232841	0.160796	2.4357		2.77136	0	0	0.209018	0.232841	0.160796	2.4357		0.340193	0	0	0.0226478	0.0233092	0.0169053	0.186342
Acetylene	3.93572	0.637905	0	8.67904	82.4223	2.52249	0.377476		101.808	25.3004	0	8.67904	82.4223	254.757	29.053		5.94566	2.05775	0	0.70589	6.95959	21.5088	1.85432
Ethene	67.2224	26.9776	2.78375	19.1618	68.8675	18.9111	1.87233		1745.54	1072.79	1391.84	398.228	5233.52	1903.96	142.481		100.514	128.726	167.01	47.7843	394.629	143.567	8.40339
Propene	3.59721	0.936224	34.4908	2.007	1.49212	2.33832	0.282827		91.8814	37.3514	34.4908	2.007	112.326	234.483	21.6403		5.29174	2.1524	1.98756	0.115655	6.50973	13.589	1.25304
trans-2-Butene	2.08059	5.88484	30.088	4.49385	1.82464	3.56136	16.1847		52.8836	5.88484	30.088	4.49385	1.82464	3.56136	16.1847		3.15148	0.342379	1.75052	0.261452	0.110301	0.21021	0.936313
1-Butene	0.813467	4.14725	7.86916	1.04473	6.17601	15.138	9.7899		20.7532	4.14725	7.86916	1.04473	6.17601	15.138	9.7899		1.19914	0.238913	0.453323	0.0601843	0.356195	0.872468	0.567881
cis-2-Butene	1.30809	3.5893	16.4449	2.11174	1.50911	2.87769	6.89803		32.8304	3.5893	16.4449	2.11174	1.50911	2.87769	6.89803		1.89118	0.207284	0.949704	0.121954	0.088936	0.16683	0.399995
isoprene	1.3822	0.897133	0.54577	0.422694	0.464602	0.584286	0.411376		1.3822	0.897133	0.54577	0.422694	0.464602	0.584286	0.411376		0.0795934	0.0535525	0.0325786	0.0252318	0.0395972	0.0445331	0.0439621
trans-2-Pentene	0.587694	0.209088	0.783302	0.435797	0.45408	0.472572	0.258994		0.587694	0.209088	0.783302	0.435797	0.45408	0.472572	0.258994		0.03377	0.0120936	0.045306	0.0252064	0.0292921	0.030245	0.0151234
cis-2-Pentene	0.547882	0.245098	0	0.341551	0.201312	0.316705	0		0.547882	0.245098	0	0.341551	0.201312	0.316705	0		0.0314903	0.0141818	0	0.0197627	0.0127601	0.0189908	0
1-Pentene	0	0.232152	0.509857	0.373222	0.338018	0.407846	0.161295		0	0.232152	0.509857	0.373222	0.338018	0.407846	0.161295		0	0.0133564	0.0293336	0.0214726	0.0197859	0.0237364	0.00978491
1-hexene	0	0.0897521	0.178726	0.159511	0	0	1.89453		0	0.0897521	0.178726	0.159511	0	0	1.89453		0.191735	0.00519201	0.010339	0.00922748	0.133839	0.180867	0.0345546
Ethane	183.01	152.773	174.277	147.666	185.907	176.195	143.078		4667.19	6039.66	87226.1	3094.11	14043.8	17643.3	11010.7		334.309	424.247	6127.07	217.341	861.877	1082.78	640.718
Propane	23.5215	17.0302	24.5521	8.55737	18.7447	17.2538	16.8727		587.253	675.446	12300.7	179.728	1408.38	1731.99	1286.8		33.9457	39.005	710.327	10.3788	81.7949	100.589	74.8998
n-Butane	9.95332	3.36452	3.56436	0.997909	2.61264	2.84338	0.63642		252.872	133.443	1786.51	20.8701	196.994	286.898	48.7277		14.5286	7.69451	103.013	1.2034	11.4292	16.6449	2.82235
Isobutane/ 2-Methylpropane	6.7145	2.71591	2.92903	0.680367	2.92032	3.02656	0.159164		169.644	107.718	1465.11	13.6083	219.418	302.699	12.2503		9.77474	6.21767	84.5685	0.785492	12.7278	17.5586	0.717218
Cyclopentane	0.408791	0.912639	1.28764	1.20212	0.822204	0.836211	0		0.408791	0.912639	1.28764	1.20212	0.822204	0.836211	0		0.0253807	0.0573868	0.0809668	0.0755892	0.0663642	0.0671345	0
Isopentane/2-Methylbutane	0.586876	8.09505	55.4955	6.46216	13.9711	20.7469	1.97786		14.8276	8.09505	55.4955	6.46216	13.9711	20.7469	1.97786		1.07794	0.670473	4.59642	0.535229	0.837366	1.21598	0.180707
n-Pentane	5.67433	2.16768	13.6225	1.54661	5.32408	8.45454	0.445464		5.67433	2.16768	13.6225	1.54661	5.32408	8.45454	0.445464		0.326123	0.125046	0.785838	0.0892189	0.322605	0.496423	0.0548181
Cyclohexane	6.19394	1.08067	1.63974	0.785143	1.16103	1.1615	0.133509		6.19394	1.08067	1.63974	0.785143	1.16103	1.1615	0.133509		0.357219	0.0622522	0.0944572	0.0452281	0.0785683	0.0785962	0.0198983
Methylcyclopentane	0	0	2.08559	0.236634	0.839968	1.05526	4.89765		0	0	2.08559	0.236634	0.839968	1.05526	4.89765		0	0	0.120421	0.0136631	0.0541571	0.0665572	0.289123
2,2-Dimethylbutane	2.89471	2.59777	2.51519	2.94917	1.83484	1.38772	0.0967723		2.89471	2.59777	2.51519	2.94917	1.83484	1.38772	0.0967723		0.16732	0.149919	0.145154	0.170199	0.116706	0.0941281	0.0936537
2,3-Dimethylbutane	1.28051	0.932332	0.576652	0.505994	0.690355	0.932224	0		1.28051	0.932332	0.576652	0.505994	0.690355	0.932224	0		0.0736379	0.054091	0.0334555	0.0293561	0.0434066	0.0565445	0
n-Hexane	3.3356	0	0	0	2.2446	3.07229	0.360476		3.3356	0	0	0	2.2446	3.07229	0.360476		0	0	0	0	0.00111559	0.00111559	0.114433
2-Methylpentane	0	1.376	0.959092	0.371256	1.93135	2.1196	0.657539		0	1.376	0.959092	0.371256	1.93135	2.1196	0.657539		0.0901503	0.0802594	0.055942	0.0216547	0.121413	0.131611	0.0441252
3-Methylpentane	1.68496	1.5095	1.02336	0.96481	0.938088	1.00968	0.099536		1.68496	1.5095	1.02336	0.96481	0.938088	1.00968	0.099536		0.0969158	0.0870449	0.0590115	0.0556354	0.0584462	0.0623811	0.0127727
3-Methylhexane	0.876259	0.969124	0.0173663	0.852153	0.59479	0.529892	9.05734		0.876259	0.969124	0.0173663	0.852153	0.59479	0.529892	9.05734		0.0503395	0.0559163	0.001002	0.0491673	0.0380793	0.0344914	0.555818
2-Methylhexane	0.35771	0.580186	1.36141	0.750437	0.727693	0	6.3693		0.35771	0.580186	1.36141	0.750437	0.727693	0	6.3693		0.020551	0.0334179	0.0784151	0.0432241	0.0445287	0.0116408	0.420456
2,3-Dimethylpentane	0.828117	0.769466	0.518448	0.776167	0.151352	0.343362	1.52303		0.828117	0.769466	0.518448	0.776167	0.151352	0.343362	1.52303		0.0476002	0.0444691	0.0299623	0.0448564	0.00985558	0.0209681	0.0915718
2,4-Dimethylpentane	0	0	0	0	0.377943	0.448723	2.54998		0	0	0	0	0.377943	0.448723	2.54998		0	0	0	0	0.0223027	0.0263773	0.15352
n-Heptane	0.3279	1.05084	0.897316	0.648101	1.11066	0.957347	22.8439		0.3279	1.05084	0.897316	0.648101	1.11066	0.957347	22.8439		0.0190789	0.0608695	0.0519767	0.037541	0.0695963	0.0605784	1.4213
n-Octane	3.56133	1.56961	1.5151	1.16448	0.753745	0.292374	27.3098		3.56133	1.56961	1.5151	1.16448	0.753745	0.292374	27.3098		0.204784	0.0925832	0.0893679	0.0686864	0.048679	0.0225986	2.02625
3-Methylheptane	0	0.282688	0.565265	0.300117	0.647595	0.0446529	27.4229		0	0.282688	0.565265	0.300117	0.647595	0.0446529	27.4229		0	0.017069	0.0341313	0.0181214	0.0397314	0.00601108	2.01091
2-Methylheptane	1.56812	0	0	0.179487	0.466787	0	31.8491		1.56812	0	0	0.179487	0.466787	0	31.8491		0	0	0	0.0104739	0.0287489	0	2.1523
		*Since some compounds are very high in these samples, therefore compounds like Ethane, propane, n-butane, i-butane, i-pentane, n-pentane, acetylene, ethene, propene, trans-butene, cis-2-butene, 1-butene were usually measured at higher dilutions as compared to the rest of the compounds

## Sheet:  Ambient bgd vehicular exhaust
Compounds	Ambient background mixing ratios (ppb)
	Background 1		Background 2		Background 3		Background 4		Background 5		Background 6		Background 7
	mixing ratio	uncertainty	mixing ratio	uncertainty	mixing ratio	uncertainty	mixing ratio	uncertainty	mixing ratio	uncertainty	mixing ratio	uncertainty	mixing ratio	uncertainty
Benzene	0.783622	0.0465835	0.864195	0.0516347	1.06119	0.063405	0.380956	0.0219141	0.579687	0.0344603	1.11813	0.0714379	0.812385	0.0467648
Toluene	6.66139	0.404306	2.73609	0.223538	2.18794	0.178755	0.549255	0.0320555	2.70497	0.164175	2.14604	0.129674	4.63833	0.269504		*Ambient backgrounds collected from the sampling sites of the vehicular tailpipe emissions
Styrene	1.71932	0.102353	0.262429	0.0200886	0.474856	0.0363497	0.0717484	0.00495477	0.923546	0.0549801	0.495018	0.0372361	1.55541	0.0969141
m/p-Xylene	8.47397	0.506797	0.624845	0.0488434	0.809468	0.0632751	0.413438	0.0290721	4.84899	0.29	1.2512	0.0917813	4.12671	0.256103
Ethylbenzene	2.28936	0.135353	0.650399	0.045819	1.64481	0.115873	0.263081	0.0170313	1.3295	0.0786031	0.973885	0.0706084	1.35152	0.083827
o-Xylene	0.63435	0.0379096	0.354777	0.0278855	0.223187	0.0175425	0.0661053	0.00380932	0.425343	0.0254191	0.437241	0.0334308	0.132993	0.00803686
m-Ethyltoluene	2.02641	0.1386	0.32418	0.0257723	0.36454	0.0289809	0.0340119	0.00292186	1.34278	0.0918422	0.330877	0.0251415	0.954942	0.0755208
1,2,3-Trimethylbenzene	1.42248	0.152188	2.9105	0.219742	1.96714	0.148519	0	0	1.07536	0.115051	0.677569	0.0541466	0.947606	0.0934877
o-Ethyltoluene	0.713978	0.0503815	0.17875	0.0172137	0.215448	0.0207476	0.00841885	0.00073934	0.4395	0.0310131	0.22519	0.017157	0.578682	0.0475618
1,3,5-Trimethylbenzene	0.982993	0.0721881	0.340387	0.0255631	0.142024	0.010666	0.0220342	0.00196614	0.688901	0.0505909	0.416185	0.0320939	0.496497	0.0410467
p-Ethyltoluene	1.22171	0.0912904	0.311477	0.0231739	0.26186	0.0194824	0.0223808	0.00206084	0.917141	0.0685322	0.329579	0.0254869	0.443265	0.0359432
Isopropylbenzene	0.129196	0.0074831	0.0670079	0.00458286	0.0681364	0.00466005	0.242312	0.0158358	0.0752948	0.00436111	0.0430382	0.00320725	0.121437	0.00755882
1,2,4-Trimethylbenzene	0.696293	0.0492462	0.846892	0.0538623	0.563726	0.035853	0.0918556	0.00810476	0.626704	0.0443245	1.73094	0.138202	0.158714	0.0127493
n-Propylbenzene	0.625226	0.0406955	0.141389	0.0110283	0.136295	0.010631	0.0232091	0.0018306	0.414312	0.0269673	0.15396	0.0116153	0.305354	0.02262
p-Diethylbenzene	1.13184	0.147443	0.537339	0.0374525	0.271131	0.0188978	0.0521528	0.00763488	1.0227	0.133226	0.32212	0.0280119	0.395816	0.0401117
m-Diethylbenzene	0.447318	0.0484684	0.132393	0.0101281	0.0270016	0.00206563	0.0198751	0.00243974	0.214203	0.0232096	0.0721734	0.00589385	0.0749419	0.00714148
Acetylene	1.80818	0.147064	1.57082	0.100053	1.86495	0.118787	1.76001	0.102786	3.11527	0.253373	6.08119	0.382899	1.30076	0.10982
Ethene	1.4474	0.173677	1.61098	0.0950052	1.95247	0.115144	0.635801	0.0366117	1.66064	0.199264	3.88807	0.223979	3.33808	0.251705
Propene	0.494212	0.0284793	0.918873	0.0531907	0.513555	0.0297281	0.184688	0.0106367	0.424488	0.0244615	0.646019	0.0433846	0.506324	0.029343
trans-2-Butene	0.696528	0.040524	0.867947	0.0502118	0.0656597	0.00379849	0.0513793	0.00306183	0.291524	0.0169608	0.215219	0.0148939	0.473974	0.0277319
1-Butene	0.339923	0.0195822	0.925569	0.0536795	0.187312	0.0108634	0.0476117	0.00275105	0.152796	0.00880221	0.394101	0.0269717	0.250823	0.0144541
cis-2-Butene	0.349883	0.020206	0.395517	0.0229336	0.0687417	0.00398592	0.0311338	0.00179345	0.165566	0.00956152	0.14034	0.00965129	0.325841	0.0187702
isoprene	0.0722878	0.00431507	0.260045	0.0170849	0.52774	0.0346725	0.116516	0.00670951	0.150542	0.0089863	0.137482	0.00813654	0.508072	0.0292216
trans-2-Pentene	0.080274	0.00464303	0.0524536	0.00305158	0.0223378	0.00129954	0.00492	0.000282712	0.0550877	0.00318626	0.0690212	0.00475243	0.230132	0.013242
cis-2-Pentene	0.0476947	0.0027597	0.0292781	0.00170571	0.0152784	0.0008901	0.00416105	0.000239162	0.0275369	0.00159333	0.0344085	0.00234784	0.0931173	0.00535691
1-Pentene	0.0409044	0.00235335	0.0468844	0.00272375	0.0485009	0.00281766	0.00951834	0.000547092	0.0250477	0.00144107	0.0472496	0.00321838	0.065811	0.00378125
1-hexene	0.333381	0.0192855	1.15385	0.0678514	0.46406	0.0272888	0.223752	0.0128616	0.00540425	0.000312627	1.96061	0.134549	0.53671	0.0311251
Ethane	2.27336	0.159688	1.7551	0.10213	2.15887	0.125626	2.39482	0.17154	2.79108	0.196055	3.49231	0.203799	0.90262	0.0553942
Propane	1.20127	0.0693698	1.80092	0.104824	4.23368	0.246426	0.842161	0.0486805	1.02467	0.0591717	3.41609	0.239309	0.955401	0.0554871
n-Butane	2.25132	0.129815	2.44933	0.141598	3.00631	0.173797	0.428459	0.0246168	1.04696	0.0603693	3.13685	0.219855	1.73562	0.100693
Isobutane/ 2-Methylpropane	1.32616	0.0765485	1.6257	0.093898	2.03128	0.117323	0.280924	0.0161866	0.61623	0.0355698	1.8865	0.130531	0.85653	0.0496844
Cyclopentane	0.152632	0.00959753	0.176413	0.0104218	0.220416	0.0130213	0.0359406	0.00223145	0.140031	0.00880513	0.263759	0.0191265	0.564607	0.0375675
Isopentane/2-Methylbutane	1.44994	0.120092	2.15316	0.124544	2.41831	0.139881	0.357532	0.025992	1.62968	0.134978	3.32992	0.229864	4.12016	0.236859
n-Pentane	0.522679	0.0301517	1.19347	0.0697298	0.82575	0.0482455	0.153496	0.00882194	0.428696	0.0247301	1.08543	0.0740672	1.7852	0.10256
Cyclohexane	0.172455	0.00993427	0.36602	0.0219391	0.303943	0.0182182	0.0349664	0.0020166	0.123018	0.00708643	0.275705	0.0195999	0.423529	0.0269252
Methylcyclopentane	0.128352	0.00741096	0.455121	0.0268411	0.21568	0.0127199	0.0581753	0.00335221	0	0	0.498511	0.0347981	0.306547	0.0185669
2,2-Dimethylbutane	0.351969	0.0203124	0.896589	0.0535315	1.5656	0.0934753	0.0983462	0.00568463	0.547791	0.0316135	0.867493	0.0592713	0.869535	0.049979
2,3-Dimethylbutane	0.0871179	0.00505431	0.188045	0.0110368	0.234378	0.0137562	0.0253973	0.00146052	0.0932128	0.00540791	0.229668	0.015708	0.29412	0.0170133
n-Hexane	0.0626657	0.00360766	0.0181584	0.00109666	0.0301798	0.00182268	0.0116727	0.000670827	0.0180692	0.00104024	0.0145014	0.000903671	0.0191252	0.00111559
2-Methylpentane	0.321325	0.0187423	0.514343	0.0299905	0.374595	0.021842	0.1001	0.00575473	0.275699	0.016081	0.740163	0.048403	0.791529	0.0460422
3-Methylpentane	0.141165	0.00814021	0.28398	0.0166141	0.194309	0.011368	0.049488	0.00284646	0.113236	0.00652968	0.488393	0.0350013	0.349045	0.0203816
3-Methylhexane	0.219749	0.012679	0.265593	0.0162971	0.121096	0.00743059	0.0701467	0.0040298	0.139642	0.00805701	0.134752	0.00905072	0.22956	0.013711
2-Methylhexane	0.185657	0.0106936	0.0846447	0.0055867	0.116702	0.00770253	0.036185	0.00207889	0.10677	0.00614979	0.123162	0.00859742	0.197089	0.0116408
2,3-Dimethylpentane	0.049565	0.00286447	0.234056	0.0140617	0.059962	0.00360241	0.00598306	0.000343907	0.0386891	0.00223593	0.049574	0.00337856	0.0634752	0.00381167
2,4-Dimethylpentane	0.0412517	0.0023994	0.0911667	0.00548718	0.0586868	0.00353227	0.0157919	0.000907942	0.0313036	0.00182077	0.0395788	0.00275898	0.0623925	0.00363267
n-Heptane	0.452996	0.0262396	0.549321	0.0341769	0.14215	0.00884412	0.0541095	0.00314837	0.213454	0.0123643	0.19313	0.0135565	0.273108	0.0166185
n-Octane	0.541241	0.031925	0.324152	0.0240502	0.127417	0.00945364	0	0	0.26736	0.0157701	0.231199	0.0170028	0.217054	0.0134706
3-Methylheptane	0.181247	0.0109439	0.14472	0.0106122	0	0	0	0	0.0737319	0.00445201	0	0	0.0882251	0.00536327
2-Methylheptane	0.19338	0.0112846	0.191104	0.0129144	0	0	0	0	0.0821753	0.00479531	0.0793778	0.00569447	0.0843536	0.00511243

## Sheet: Petrol evaporative
		Diluted mixing ratios (ppb)											Actual sample mixing ratios (ppb)											measurement uncertainty to actual sample mixing ratios (ppb)											Ambient background (ppb)
Compounds		Petrol 1	Petrol 2	Petrol 3	Petrol 4	Petrol 5	Petrol 6	Petrol 7	Petrol 8	Petrol 9	Petrol 10		Petrol 1	Petrol 2	Petrol 3	Petrol 4	Petrol 5	Petrol 6	Petrol 7	Petrol 8	Petrol 9	Petrol 10		Petrol 1	Petrol 2	Petrol 3	Petrol 4	Petrol 5	Petrol 6	Petrol 7	Petrol 8	Petrol 9	Petrol 10		mixing ratio	uncertainty
Benzene		30.5672	8.77215	6.39493	2.1431	6.71418	2.2221	10.9878	16.6558	2.31576	2.5881		307262	30541.4	45576.6	14381.3	312466	25263.2	400737	317340	330692	396206		17690.2	1758.45	2624.07	828.054	17989.8	1454.53	23071.9	18270.4	19039.1	22811		0.681714	0.0392487
Toluene		57.9144	23.7383	17.192	12.0228	14.602	7.34586	24.5361	37.8165	9.08294	4.58462		993379	118166	204950	52564.3	867010	119696	698269	816393	848723	659622		57799.9	6875.64	11925.1	3058.59	50447.1	6964.55	40628.9	47501.9	49383.1	38380.2		1.00909	0.0587142
Styrene		12.7387	9.03773	7.62509	6.45026	4.90114	4.22327	7.39567	7.84157	4.31279	1.40806		46234.7	6793.95	7359.06	2070.73	45443.8	11864.8	25370.2	22846.1	24951.9	18801.7		2729.78	401.143	434.508	122.277	2683.08	700.519	1497.9	1348.88	1473.2	1110.09		0.105899	0.00625244
m/p-Xylene		28.7395	18.2782	15.4329	13.1132	9.10153	8.23087	15.6975	17.6337	8.87042	2.47289		149479	20629.8	23790.2	6907.36	130420	30139.2	65825.3	69391.9	81648	59839.9		8867.49	1223.85	1411.33	409.799	7736.88	1787.95	3904.93	4116.51	4843.58	3549.87		0.227059	0.0134697
Ethylbenzene		22.5445	13.3839	10.4216	7.06017	5.76201	4.1491	11.3715	10.0095	4.79024	1.79686		73045.3	12359.8	16108.8	3982.78	65398.2	14136.1	33637.4	40536	41761.2	30604.1		4244.35	718.208	936.047	231.462	3799.98	821.393	1954.51	2355.36	2426.55	1778.26		0.209769	0.0121886
o-Xylene		20.2977	17.7448	16.9818	22.6683	15.0844	14.2451	14.867	24.8688	14.5207	4.56512		4308.96	12565.4	524.994	0	25634	17287.6	15849.2	6454.82	6981.63	3590.49		250.399	730.179	30.5131	0	1489.6	1004.58	921.001	375.093	405.706	208.647		0.06801	0.00395206
m-Ethyltoluene		5.56038	5.7882	4.84837	5.07734	2.95672	4.00095	4.69739	3.62201	2.79198	0.765888		15023.3	1904.31	1830.51	525.857	13891.5	6356.45	4090.29	5322.64	5847.34	3862.22		947.017	120.049	115.397	33.1572	875.665	400.687	257.838	335.52	368.595	243.461		0.0435656	0.0027462
1,2,3-Trimethylbenzene		3.73778	4.48205	4.31462	4.26343	3.67173	5.66801	3.95601	3.05028	3.73946	1.33425		7015.8	332.106	115.99	44.1015	5811.91	2045.78	1543.5	116.071	0	0		535.05	25.3397	8.8583	3.37599	443.234	156.022	117.717	8.85896	0	0		0	0
o-Ethyltoluene		2.23859	2.51324	2.22287	3.10525	1.23822	3.44894	2.21901	1.62553	1.24952	0.339086		6542.37	753.446	761.827	211.386	7095.27	3028.96	3783.33	2852.03	3450.97	2409.48		413.401	47.6122	48.1418	13.3606	448.336	191.395	239.061	180.215	218.06	152.251		0.0163	0.00102996
1,3,5-Trimethylbenzene		4.37515	4.90707	4.62948	5.72678	3.98469	5.37028	4.12336	5.61344	4.03929	1.3434		6943.87	736.332	916.679	244.927	10504.9	4886.42	3485.14	2181.22	3822.92	1736.68		434.112	46.0369	57.3116	15.3159	656.733	305.486	217.882	136.365	238.999	108.574		0.0435861	0.00272486
p-Ethyltoluene		4.3023	4.65372	4.05475	4.4454	3.26985	4.13073	3.69904	1.80574	3.3275	1.11812		7226.01	771.038	776.892	195.625	7957.45	4234.4	5119.19	2939.4	2837.9	1778.47		460.059	49.095	49.4677	12.4605	506.624	269.591	325.922	187.143	180.681	113.231		0.0421098	0.00268098
Isopropylbenzene		0.558362	0.413029	0.335849	0.361105	0.78195	0.18495	0.306564	0.314983	0.167906	0.0452091		3337.98	593.471	519.892	182.359	1958.29	235.53	1096.49	1069.96	1005.97	481.311		201.411	35.8118	31.3722	11.006	118.16	14.2115	66.1604	64.5596	60.6985	29.0415		0	0
1,2,4-Trimethylbenzene		8.82599	10.6801	11.1594	15.1903	11.3928	18.5082	10.8535	14.4075	11.4435	4.14899		855.114	0	8.87492	0	30566.5	20505.3	17421.2	7446.34	6145.82	3517.38		81.1204	0	0.863544	0	2898.93	1944.72	1652.23	706.216	582.875	333.595		0.0707053	0.00670567
n-Propylbenzene		4.04902	4.14136	3.21215	3.07237	2.21565	2.66226	3.12658	3.11042	2.16743	0.665209		5940.87	750.45	718.761	196.503	6345.77	3351.66	2998.87	2072.09	2316.84	1703.53		363.906	45.9711	44.0301	12.0396	388.705	205.304	183.694	126.925	141.917	104.349		0.0165021	0.00101082
p-Diethylbenzene		2.21799	2.61219	2.4413	2.76531	1.66601	3.26656	2.29103	2.13197	1.69272	0.616547		1569.98	79.1564	115.828	1.48912	7536.56	5612.75	4418.18	2263.44	1757.79	1792.31		110.997	5.60563	8.19804	0.115498	532.785	396.785	312.338	160.012	124.266	126.707		0.0332252	0.00234879
m-Diethylbenzene		0.484713	0.212342	0.589781	0.810061	0.149225	0.389417	0.258797	0.148859	0.131909	0.0416836		1520.19	109.682	88.8495	51.3034	1032.36	548.248	546.472	805.722	748.153	1005.52		106.222	7.67712	6.22167	3.59854	72.1258	38.3032	38.1791	56.2915	52.2695	70.2504		0	0
Acetylene		0	0	0	0	0	0.170156	0	2.07752	0.601034	0		0	0	0	0	0	0	0	0	0	0		0	0	0	0	0.0561909	0	0	0	0	0		0.963692	0.0561909
Ethene		2.32304	1.25186	4.12521	1.0516	1.88393	1.42005	1.20338	13.7447	3.79224	1.27013		1168.86	3822.36	2247.82	4486.91	0	0	0	0	0	0		69.4269	226.568	133.323	265.923	2515.51	0	0	0	0	0		3.22799	0.191163
Propene		3.02122	2.22179	1.76855	1.37457	0.93233	1.66822	0.814209	3.06673	1.35662	0.848044		39461.5	0	0	0	0	0	76841.4	0	4140.79	0		2270.88	0	0	0	415.563	0	4421.83	0	238.379	0		1.7851	0.102721
trans-2-Butene		25.6111	22.0672	17.5699	15.9043	4.33387	3.6767	3.49727	4.81343	2.00407	1.94419		1.28694e+06	85326.2	185233	37410.3	464661	170036	742532	979250	667108	647050		73931.6	4901.81	10641.2	2149.16	26693.7	9768.17	42656.7	56255.5	38323.7	37171.5		0.127042	0.00729827
1-Butene		8.00565	6.92537	5.4528	16.4452	2.03423	1.81528	1.68093	1.8238	1.02121	0.907159		275650	11650.4	25873.8	4814.93	113805	71785.6	162887	199079	126221	118648		15840.3	669.529	1486.88	276.73	6539.81	4125.17	9360.32	11440.1	7253.32	6818.14		0.101373	0.00582544
cis-2-Butene		12.7981	11.0267	8.61547	7.97378	2.35384	2.04197	2.00788	2.75762	1.11074	1.10522		688947	20598.6	59165.9	7272.81	263589	89010.8	411640	542265	375051	370661		39597	1183.92	3400.56	418.025	15149.7	5115.86	23658.8	31166.4	21555.9	21303.6		0.0867549	0.0049862
isoprene		0.139529	0.0641283	0.128753	0.0834254	0.0600069	0.0331034	0.0762637	0.230525	0	0.0288948		20988.5	1740.5	20368	812.072	45251.1	1166.41	78097.4	42309.5	40821.1	68118.4		1244.82	103.261	1208.02	48.1975	2683.78	69.195	4631.83	2509.32	2421.04	4040		0.291722	0.0173015
trans-2-Pentene		1.34685	0.368851	0.438169	0.56921	0.366559	0.14875	0.488166	0.641965	0.330406	0.351457		913441	8767.3	103972	39887.5	725580	38635.4	1.63307e+06	846510	904030	1.34732e+06		52899.3	507.735	6021.22	2309.97	42019.9	2237.46	94574.8	49023.2	52354.3	78026.2		0.0316992	0.00183577
cis-2-Pentene		0.424154	0.12744	0.154729	0.261751	0.128114	0.0939974	0.212536	1.15923	0.0407268	0.132684		281827	26321.7	33598.4	12216.8	234345	13915.7	513998	280500	287490	433422		16316.4	1523.9	1945.18	707.291	13567.4	805.652	29757.9	16239.6	16644.2	25093		0.0193595	0.00112082
1-Pentene		0.535443	0.258635	0.22209	0.314684	0.117146	0.185357	0.148102	0.72294	0.0746176	0.0795833		107554	10842	19481.7	4913.11	70717.1	4046.24	170764	100080	96384.7	143599		6261.09	631.155	1134.1	286.013	4116.71	235.548	9940.78	5826.03	5610.91	8359.41		0.0235641	0.00137175
1-hexene		0.255764	0.170624	0.0966337	0.0839398	0.0645245	4.85692	0.0757508	0.190861	0	0.0319513		14682.3	1123.3	1649.07	0	33583.3	2542.52	7025.8	3675.8	3335.96	5791.52		859.045	65.7256	96.4876	0	1964.92	148.76	411.072	215.067	195.183	338.855		0	0
Ethane		23.4002	6.7763	4.97616	0.815279	5.15285	1.77733	2.06234	8.31667	2.31574	2.24995		13691.8	9903.14	5785.54	9986.29	0	0	0	0	0	0		792.129	573.021	334.891	577.83	4216.19	0	0	0	0	0		1.118	0.0646561
Propane		10.3788	6.50355	5.07474	4.12105	3.79676	2.63463	2.80476	8.70347	1.60556	1.56431		385580	5815.17	9011.97	3264.68	77472.3	60629.7	128625	138621	54004.2	43522.2		23551.3	355.634	550.892	199.853	4732.01	3703.28	7856.35	8466.9	3298.59	2658.37		1.08773	0.0664378
n-Butane		69.2011	47.1839	36.7391	31.5098	12.5655	8.24408	11.9937	25.3333	4.80198	6.78244		4.68694e+06	436434	793456	187879	1.52269e+06	384170	3.83274e+06	4.18915e+06	2.39291e+06	2.67501e+06		269661	25110.2	45651.3	10809.8	87607	22103	220515	241020	137675	153905		0.742839	0.0427388
Isobutane/ 2-Methylpropane		18.8614	13.8689	11.0182	9.97677	4.44526	3.11907	3.61791	13.139	1.77709	2.41346		1.22456e+06	170721	173915	66713.3	505667	145038	1.67634e+06	1.60512e+06	792288	839605		70448.7	9821.68	10005.4	3838.16	29090.8	8343.99	96439.2	92341.5	45579.9	48302.1		0.437929	0.0251938
Cyclopentane		14.7627	3.83442	2.86765	1.11448	4.36242	1.04903	5.24395	11.0191	1.06636	2.2721		1.52602e+06	56259.3	603117	60877.1	939054	56861.7	1.1261e+06	1.07685e+06	1.27668e+06	1.00201e+06		88310	3255.71	34902.1	3522.94	54342.6	3290.56	65166.8	62316.6	73880.8	57985.9		0.0608424	0.00352092
Isopentane/2-Methylbutane		70.1625	19.5333	18.0657	12.3009	19.0877	6.75104	21.476	105.818	5.31688	15.4444		2.81165e+07	3.2105e+06	4.56321e+06	1.34232e+06	2.12819e+07	1.11703e+06	4.24304e+07	4.1723e+07	3.10895e+07	3.63662e+07		1.61668e+06	184602	262382	77182.5	1.22369e+06	64228.4	2.43972e+06	2.39904e+06	1.78762e+06	2.09104e+06		0.662895	0.038116
n-Pentane		48.5195	11.8866	8.96332	4.41015	12.1356	3.51198	15.7833	53.7971	3.27414	7.72211		6.44791e+06	775088	1.2931e+06	326441	5.34447e+06	274000	9.72266e+06	9.42086e+06	7.57339e+06	8.73037e+06		371025	44600	74407.3	18784.1	307531	15766.5	559460	542094	435787	502362		0.240206	0.0138219
Cyclohexane		61.7089	18.2104	13.1465	6.94282	15.5953	4.24667	21.9123	35.3242	5.14498	7.38741		316740	35024.3	58361	15022	357456	20345	452084	389114	413921	428568		18322.3	2026.04	3375.98	868.98	20677.6	1176.9	26151.5	22508.9	23943.9	24791.2		0.332012	0.0192057
Methylcyclopentane		74.9879	21.1782	15.2396	7.57063	18.4085	4.42961	26.0877	43.5958	5.72441	9.07166		469385	51529.2	85602.2	21683.9	465257	25340.8	656881	545074	569622	630233		27414.6	3009.59	4999.64	1266.46	27173.5	1480.05	38365.4	31835.3	33269	36809		0.122045	0.00712806
2,2-Dimethylbutane		10.4854	4.17499	2.94847	1.52919	5.73473	1.6155	7.80003	27.1255	2.41024	3.5354		2.5117e+06	265859	455485	116979	3.25471e+06	115148	5.15835e+06	4.76058e+06	3.67724e+06	4.7634e+06		144690	15315.2	26238.8	6738.74	187492	6633.25	297154	274240	211832	274402		0.154331	0.00889044
2,3-Dimethylbutane		15.1516	1.69706	1.17606	0.699435	2.25934	1.27655	2.50143	7.56691	0.550168	1.31011		616176	69778.4	120653	30116.5	860225	30242.2	1.21541e+06	1.02206e+06	1.01961e+06	1.22071e+06		35422.4	4011.39	6936.03	1731.33	49452.3	1738.55	69870.8	58755.9	58615.2	70175.4		0.0540831	0.00310911
n-Hexane		62.9231	17.7681	12.8557	14.1761	17.5221	4.70681	22.8907	57.9732	1.39757	8.03265		594601	65335.4	109759	27197.6	664168	41343.9	895782	928436	790079	894941		34178.9	3755.64	6309.18	1563.4	38177.8	2376.55	51491.4	53368.5	45415.4	51443.1		0.352851	0.0202826
2-Methylpentane		29.6263	8.21437	6.16393	4.46131	9.93181	0.571366	11.413	40.0359	2.88176	5.75947		2.00687e+06	238487	418573	98927.8	2.58443e+06	101934	3.57647e+06	3.1162e+06	3.19558e+06	3.66545e+06		115322	13704.4	24052.8	5684.77	148511	5857.54	205517	179068	183630	210630		0.162321	0.00932758
3-Methylpentane		23.7795	6.21971	4.23595	2.31183	7.87781	1.81553	8.68478	21.5914	1.82071	3.62605		842769	89890.2	149819	37670.6	959537	39988.8	1.24938e+06	1.21335e+06	1.17517e+06	1.34514e+06		50431.2	5379.04	8965.2	2254.23	57418.7	2392.93	74763.1	72606.7	70322.4	80493.3		0.107691	0.00644424
3-Methylhexane		39.2215	12.5456	9.33855	8.78714	9.40592	2.89777	14.6801	35.8199	4.1413	4.27434		197307	23510.3	35685	9550.21	283312	15356.9	293313	269615	286880	285553		11411.4	1359.74	2063.87	552.352	16385.5	888.177	16963.9	15593.3	16591.9	16515.1		0.0290555	0.00168044
2-Methylhexane		32.9546	10.3404	7.57251	6.21533	7.83629	2.36321	12.1205	30.0848	3.36187	3.58304		175654	20927.9	32008.8	8331.16	242346	12408	257618	233902	250604	250813		10122.7	1206.05	1844.63	480.119	13966.1	715.059	14846.2	13479.5	14442	14454		0.0362519	0.00208915
2,3-Dimethylpentane		13.0314	4.10619	3.03739	3.17055	3.27743	0.953725	4.79175	11.4423	1.31836	1.61161		73854.4	8473.78	12712.1	3413.93	107559	5658.6	114301	101918	110060	113038		4289.18	492.127	738.275	198.27	6246.61	328.631	6638.15	5919.01	6391.86	6564.79		0.0160786	0.000933781
2,4-Dimethylpentane		4.3093	1.31419	0.942968	0.650803	1.13113	0.309037	1.50782	3.68274	0.384681	0.565744		60253.7	6445.7	9778.33	2728.75	83660.4	5234.84	107192	86905.1	85159	101841		3496.72	374.067	567.47	158.359	4855.09	303.796	6220.7	5043.39	4942.06	5910.18		0.0135022	0.00078358
n-Heptane		78.2103	26.8765	21.0649	26.1176	18.7238	6.62327	30.5187	67.2069	9.75832	6.99871		129944	17384.3	27569.2	6763.42	213287	20611.8	198095	185595	183619	175808		7467.26	999.002	1584.27	388.669	12256.6	1184.47	11383.6	10665.2	10551.7	10102.9		0.0693029	0.00398251
n-Octane		53.4253	27.0548	23.6865	22.3186	18.8577	8.95881	24.7598	40.3353	14.4889	6.19743		21530.7	3855.12	5632.13	1169.7	45966.9	15413.7	26911.4	22294.4	22386.2	15233.1		1241.11	222.227	324.66	67.4299	2649.69	888.501	1551.27	1285.13	1290.42	878.091		0	0
3-Methylheptane		18.9363	8.43163	6.97987	5.25102	4.90394	2.13885	8.04141	4.37003	3.73186	1.91099		30678.7	4569.78	6821.25	1467.62	38315.6	4257.24	21769.6	25024.3	29687.9	20516.3		1763.75	262.722	392.161	84.3764	2202.8	244.754	1251.55	1438.67	1706.78	1179.5		0	0
2-Methylheptane		28.2067	12.4113	10.1824	8.46171	7.94608	3.26098	12.068	6.20197	5.60622	2.97444		31478.3	4765.87	7052.85	1407.81	40387.9	6231.15	25787.4	27246.8	30881.5	21897.5		1809.36	273.941	405.396	80.921	2321.48	358.165	1482.25	1566.13	1775.06	1258.66		0	0

## Sheet: Diesel evaporative
		Diluted mixing ratios (ppb)											Actual sample mixing ratios (ppb)											measurement uncertainty to actual sample mixing ratios (ppb)											Ambient background (ppb)
Compounds		Diesel 1	Diesel 2	Diesel 3	Diesel 4	Diesel 5	Diesel 6	Diesel 7	Diesel 8	Diesel 9	Diesel 10		Diesel 1	Diesel 2	Diesel 3	Diesel 4	Diesel 5	Diesel 6	Diesel 7	Diesel 8	Diesel 9	Diesel 10		Diesel 1	Diesel 2	Diesel 3	Diesel 4	Diesel 5	Diesel 6	Diesel 7	Diesel 8	Diesel 9	Diesel 10		mixing ratio	uncertainty
Benzene		30.5672	8.77215	6.39493	2.1431	6.71418	2.2221	10.9878	16.6558	2.31576	2.5881		3078.88	208.052	877.586	637.487	1335.49	432.583	2194.5	6651.56	901.617	1010.82		177.333	12.0497	50.597	36.7736	76.9282	24.9446	126.384	382.993	51.9236	58.211		0.681714	0.0392487
Toluene		57.9144	23.7383	17.192	12.0228	14.602	7.34586	24.5361	37.8165	9.08294	4.58462		5829.62	1194.57	2377.84	1716.66	2909.51	1451.03	4906.26	15114.5	3592.63	1788.8		339.334	69.644	138.492	100.022	169.349	84.487	285.53	879.495	209.077	104.121		1.00909	0.0587142
Styrene		12.7387	9.03773	7.62509	6.45026	4.90114	4.22327	7.39567	7.84157	4.31279	1.40806		1282.82	647.683	909.017	766.341	980.682	844.43	1482.08	3135.68	1720.67	555.866		75.7574	38.2579	53.6875	45.2636	57.9072	49.8627	87.5106	185.142	101.596	32.824		0.105899	0.00625244
m/p-Xylene		28.7395	18.2782	15.4329	13.1132	9.10153	8.23087	15.6975	17.6337	8.87042	2.47289		2894.6	1316.33	1838	1550.62	1814.33	1639.33	3140.12	7041.19	3527.17	961.754		171.751	78.1248	109.072	92.0235	107.644	97.2628	186.293	417.715	209.251	57.0645		0.227059	0.0134697
Ethylbenzene		22.5445	13.3839	10.4216	7.06017	5.76201	4.1491	11.3715	10.0095	4.79024	1.79686		2272.8	708.879	1347.57	1048.38	1152.73	828.533	2280.24	4003.15	1910.28	709.939		132.103	41.2315	78.3428	60.9582	66.9915	48.1542	132.505	232.616	111.006	41.2597		0.209769	0.0121886
o-Xylene		20.2977	17.7448	16.9818	22.6683	15.0844	14.2451	14.867	24.8688	14.5207	4.56512		2044.24	2283.68	1786.4	1709.33	3028.51	2859.8	2984.81	9965.54	5815.95	1823.78		118.796	132.71	103.813	99.3348	175.99	166.187	173.451	579.1	337.967	105.982		0.06801	0.00395206
m-Ethyltoluene		5.56038	5.7882	4.84837	5.07734	2.95672	4.00095	4.69739	3.62201	2.79198	0.765888		559.12	510.333	582.129	487.207	592.372	802.262	942.248	1448.61	1115.77	303.313		35.2539	32.1786	36.7044	30.7209	37.3435	50.574	59.3981	91.3173	70.3362	19.122		0.0435656	0.0027462
1,2,3-Trimethylbenzene		3.73778	4.48205	4.31462	4.26343	3.67173	5.66801	3.95601	3.05028	3.73946	1.33425		372.88	425.97	448.051	431.14	730.524	1131.78	787.664	1208.27	1484.67	520.182		28.4492	32.498	34.1819	32.8922	55.7182	86.3184	60.0758	92.1519	113.228	39.6742		0	0
o-Ethyltoluene		2.23859	2.51324	2.22287	3.10525	1.23822	3.44894	2.21901	1.62553	1.24952	0.339086		225.118	312.65	252.858	223.531	248.149	692.504	445.287	650.387	499.607	134.522		14.2283	19.7593	15.9811	14.128	15.6811	43.7588	28.1377	41.0976	31.5702	8.50124		0.0163	0.00102996
1,3,5-Trimethylbenzene		4.37515	4.90707	4.62948	5.72678	3.98469	5.37028	4.12336	5.61344	4.03929	1.3434		439.877	576.391	493.601	465.564	799.659	1078.16	827.533	2248.51	1617.28	536.229		27.5036	36.038	30.8622	29.1094	49.9947	67.4059	51.7373	140.572	101.109	33.5254		0.0435861	0.00272486
p-Ethyltoluene		4.3023	4.65372	4.05475	4.4454	3.26985	4.13073	3.69904	1.80574	3.3275	1.11812		432.799	447.252	468.292	407.797	655.84	828.877	742.107	721.344	1331.58	445.623		27.5605	28.4807	29.8203	25.9688	41.7576	52.7742	47.2499	45.928	84.7789	28.3731		0.0421098	0.00268098
Isopropylbenzene		0.558362	0.413029	0.335849	0.361105	0.78195	0.18495	0.306564	0.314983	0.167906	0.0452091		56.3483	36.4254	41.6697	33.8746	156.49	36.4931	60.9375	124.944	65.9668	16.7652		3.40275	2.20064	2.51707	2.04672	9.44234	2.20193	3.67687	7.53894	3.98033	1.01158		0	0
1,2,4-Trimethylbenzene		8.82599	10.6801	11.1594	15.1903	11.3928	18.5082	10.8535	14.4075	11.4435	4.14899		887.291	1530.08	1074.56	1122.97	2287.34	3717.52	2178.94	5772.26	4583.56	1658.47		84.172	145.134	101.932	106.524	216.937	352.576	206.657	547.446	434.72	157.306		0.0707053	0.00670567
n-Propylbenzene		4.04902	4.14136	3.21215	3.07237	2.21565	2.66226	3.12658	3.11042	2.16743	0.665209		407.51	308.869	416.837	322.986	444.163	533.931	627.26	1244.93	866.792	264.4		24.9647	18.9225	25.536	19.7872	27.2078	32.7065	38.4233	76.2582	53.0957	16.1967		0.0165021	0.00101082
p-Diethylbenzene		2.21799	2.61219	2.4413	2.76531	1.66601	3.26656	2.29103	2.13197	1.69272	0.616547		221.636	276.915	261.451	244.19	334.835	656.545	460.463	854.886	678.755	247.211		15.678	19.5858	18.4926	17.2724	23.6729	46.4156	32.5539	60.4369	47.9851	17.4778		0.0332252	0.00234879
m-Diethylbenzene		0.484713	0.212342	0.589781	0.810061	0.149225	0.389417	0.258797	0.148859	0.131909	0.0416836		48.7526	81.6128	21.2431	59.3645	29.9943	78.2729	52.0183	59.6923	52.8955	16.7151		3.42033	5.71608	1.49842	4.16172	2.09554	5.46851	3.63424	4.17039	3.69553	1.1678		0	0
Acetylene		0	0	0	0	0	0.170156	0	2.07752	0.601034	0		0	0	0	0	0	33.2376	0	832.123	240.101	0		0	0	0	0	0	1.995	0	48.5756	14.0532	0		0.963692	0.0561909
Ethene		2.32304	1.25186	4.12521	1.0516	1.88393	1.42005	1.20338	13.7447	3.79224	1.27013		231.144	102.728	122.955	413.164	66.142	0	0	4889.79	899.239	0		13.8962	6.29324	7.49052	24.6748	4.11256	0	0	289.766	53.4224	0		3.22799	0.191163
Propene		3.02122	2.22179	1.76855	1.37457	0.93233	1.66822	0.814209	3.06673	1.35662	0.848044		194.633	28.3214	113.89	68.1127	7.5331	155.447	0	871.812	186.902	0		11.3251	1.75867	6.67933	4.04591	0.545953	9.0483	0	50.27	10.8094	0		1.7851	0.102721
trans-2-Butene		25.6111	22.0672	17.5699	15.9043	4.33387	3.6767	3.49727	4.81343	2.00407	1.94419		2545.96	1565.57	2188.02	1733.8	870.98	738.89	702.825	1930.06	803.526	779.515		146.292	89.9709	125.729	99.6353	50.043	42.4547	40.3829	110.885	46.1666	44.7873		0.127042	0.00729827
1-Butene		8.00565	6.92537	5.4528	16.4452	2.03423	1.81528	1.68093	1.8238	1.02121	0.907159		798.416	1650.81	689.307	540.577	403	358.991	331.989	719.686	397.877	352.144		45.9209	94.9036	39.651	31.1043	23.1643	20.6353	19.0836	41.3626	22.8681	20.2401		0.101373	0.00582544
cis-2-Butene		12.7981	11.0267	8.61547	7.97378	2.35384	2.04197	2.00788	2.75762	1.11074	1.10522		1276.91	789.657	1098	854.468	465.12	402.435	395.584	1089.89	429.538	427.326		73.4137	45.4088	63.1307	49.1337	26.7376	23.1348	22.741	62.646	24.6898	24.5626		0.0867549	0.0049862
isoprene		0.139529	0.0641283	0.128753	0.0834254	0.0600069	0.0331034	0.0762637	0.230525	0	0.0288948		10.282	4.61553	2.66652	9.19357	8.06626	2.65866	11.3339	84.7421	0	3.84431		0.645749	0.310708	0.196283	0.5813	0.495998	0.175835	0.68971	5.04323	0	0.248706		0.291722	0.0173015
trans-2-Pentene		1.34685	0.368851	0.438169	0.56921	0.366559	0.14875	0.488166	0.641965	0.330406	0.351457		135.993	57.4517	37.2154	44.2165	73.6467	29.8671	98.0896	257.396	132.459	140.9		7.87788	3.32938	2.15746	2.56291	4.26688	1.7315	5.68242	14.9082	7.67295	8.16181		0.0316992	0.00183577
cis-2-Pentene		0.424154	0.12744	0.154729	0.261751	0.128114	0.0939974	0.212536	1.15923	0.0407268	0.132684		42.8203	26.4176	12.8522	15.6083	25.7315	18.8741	42.7003	464.832	16.3154	53.1902		2.4802	1.53056	0.745193	0.904762	1.49085	1.09384	2.47326	26.9126	0.94551	3.08038		0.0193595	0.00112082
1-Pentene		0.535443	0.258635	0.22209	0.314684	0.117146	0.185357	0.148102	0.72294	0.0746176	0.0795833		54.029	31.7324	26.0714	22.3804	19.9213	33.6316	26.1434	282.672	22.6979	24.6891		3.14818	1.85022	1.52067	1.3058	1.16106	1.95919	1.52328	16.4568	1.32254	1.43845		0.0235641	0.00137175
1-hexene		0.255764	0.170624	0.0966337	0.0839398	0.0645245	4.85692	0.0757508	0.190861	0	0.0319513		24.1645	6.81019	15.5653	8.09227	12.9694	976.242	15.2259	76.5353	0	12.8125		1.41613	0.400758	0.913009	0.475771	0.758826	57.1188	0.890851	4.47799	0	0.749643		0	0
Ethane		23.4002	6.7763	4.97616	0.815279	5.15285	1.77733	2.06234	8.31667	2.31574	2.24995		2351.18	70.0935	672.156	490.342	641.607	0	20.414	2547.87	141.584	115.201		136.275	4.36531	39.1746	28.6604	37.1702	0	1.24692	147.413	8.24812	6.72238		1.118	0.0646561
Propane		10.3788	6.50355	5.07474	4.12105	3.79676	2.63463	2.80476	8.70347	1.60556	1.56431		1031.98	399.941	640.573	496.264	694.237	460.647	494.843	3353.35	507.238	490.697		63.4824	24.8807	39.5768	30.7633	42.4699	28.2024	30.2911	204.886	31.0391	30.0288		1.08773	0.0664378
n-Butane		69.2011	47.1839	36.7391	31.5098	12.5655	8.24408	11.9937	25.3333	4.80198	6.78244		6957.25	3150.43	4733.51	3678.59	2503.26	1634.66	2388.32	10114.6	1881.64	2675.81		400.561	181.538	272.62	211.925	144.066	94.0917	137.453	581.98	108.295	153.987		0.742839	0.0427388
Isobutane/ 2-Methylpropane		18.8614	13.8689	11.0182	9.97677	4.44526	3.11907	3.61791	13.139	1.77709	2.41346		1896.01	998.661	1391.77	1103.84	886.383	619.819	720.086	5254.93	698.882	954.068		109.259	57.6354	80.2504	63.6863	51.0183	35.6831	41.4514	302.339	40.228	54.9087		0.437929	0.0251938
Cyclopentane		14.7627	3.83442	2.86765	1.11448	4.36242	1.04903	5.24395	11.0191	1.06636	2.2721		1490.79	112.317	387.031	289.387	876.785	210.794	1053.97	4418.59	427.55	911.048		86.2855	6.51397	22.4115	16.7609	50.7426	12.2021	60.9965	255.705	24.7457	52.7255		0.0608424	0.00352092
Isopentane/2-Methylbutane		70.1625	19.5333	18.0657	12.3009	19.0877	6.75104	21.476	105.818	5.31688	15.4444		7079.01	1234.98	1965.45	1817.23	3815.32	1335.65	4295.37	42391.1	2089.77	6150.89		407.238	71.2102	113.212	104.689	219.417	76.8373	247.019	2437.5	120.219	353.73		0.662895	0.038116
n-Pentane		48.5195	11.8866	8.96332	4.41015	12.1356	3.51198	15.7833	53.7971	3.27414	7.72211		4896.36	441.315	1196.44	901.186	2424.84	691.496	3158.03	21544	1284.28	3067.91		281.803	25.452	68.9031	51.9138	139.544	39.8038	181.733	1239.7	73.9175	176.551		0.240206	0.0138219
Cyclohexane		61.7089	18.2104	13.1465	6.94282	15.5953	4.24667	21.9123	35.3242	5.14498	7.38741		6232.42	701.041	1839.06	1327.62	3134.32	853.249	4404.04	14164.7	2063.06	2962.28		360.534	40.5633	106.394	76.8085	181.328	49.3766	254.777	819.395	119.345	171.361		0.332012	0.0192057
Methylcyclopentane		74.9879	21.1782	15.2396	7.57063	18.4085	4.42961	26.0877	43.5958	5.72441	9.07166		7573.64	764.492	2138.86	1539.06	3697.23	887.467	5240.74	17476.3	2289.86	3632.1		442.349	44.6587	124.929	89.8976	215.945	51.84	306.095	1020.71	133.746	212.141		0.122045	0.00712806
2,2-Dimethylbutane		10.4854	4.17499	2.94847	1.52919	5.73473	1.6155	7.80003	27.1255	2.41024	3.5354		1058.52	153.941	421.167	297.288	1148.81	320.841	1563.93	10869.7	958.86	1410.05		61.0065	8.89726	24.2911	17.1549	66.1874	18.4914	90.1013	626.174	55.2483	81.2396		0.154331	0.00889044
2,3-Dimethylbutane		15.1516	1.69706	1.17606	0.699435	2.25934	1.27655	2.50143	7.56691	0.550168	1.31011		1528.77	69.099	169.859	117.238	451.487	253.946	500.147	3029.1	215.378	520.114		87.8876	3.97479	9.76724	6.7422	25.958	14.6018	28.7553	174.139	12.3854	29.904		0.0540831	0.00310911
n-Hexane		62.9231	17.7681	12.8557	14.1761	17.5221	4.70681	22.8907	57.9732	1.39757	8.03265		6352.14	1428.69	1791.48	1295.33	3514.56	938.686	4593.65	23232.8	546.013	3206.68		365.16	82.1498	103.004	74.4841	202.044	53.9779	264.073	1335.49	31.4062	184.347		0.352851	0.0202826
2-Methylpentane		29.6263	8.21437	6.16393	4.46131	9.93181	0.571366	11.413	40.0359	2.88176	5.75947		2989.45	447.783	826.843	619.748	1983.79	102.34	2281.51	16029.5	1130.7	2284.66		171.794	25.7405	47.5227	35.6223	114.005	5.89015	131.113	921.126	64.9857	131.297		0.162321	0.00932758
3-Methylpentane		23.7795	6.21971	4.23595	2.31183	7.87781	1.81553	8.68478	21.5914	1.82071	3.62605		2400.05	231.821	626.516	426.157	1577.74	359.217	1739.94	8646.86	718.782	1442.73		143.638	13.8915	37.51	25.5205	94.418	21.502	104.124	517.434	43.0195	86.3402		0.107691	0.00644424
3-Methylhexane		39.2215	12.5456	9.33855	8.78714	9.40592	2.89777	14.6801	35.8199	4.1413	4.27434		3961.21	887.342	1266.95	943.033	1888.57	580.434	2948.68	14359.8	1656.65	1709.99		229.108	51.3292	73.2839	54.5502	109.228	33.5714	170.54	830.508	95.8153	98.9007		0.0290555	0.00168044
2-Methylhexane		32.9546	10.3404	7.57251	6.21533	7.83629	2.36321	12.1205	30.0848	3.36187	3.58304		3328.33	627.665	1044.29	764.74	1566.95	466.862	2428.09	12047.7	1331.88	1420.56		191.812	36.1764	60.186	44.0758	90.3034	26.9067	139.93	694.298	76.7555	81.8665		0.0362519	0.00208915
2,3-Dimethylpentane		13.0314	4.10619	3.03739	3.17055	3.27743	0.953725	4.79175	11.4423	1.31836	1.61161		1314.72	318.768	413.268	305.319	658.747	191.683	963.125	4588.35	528.647	646.24		76.3561	18.5151	24.0033	17.734	38.2584	11.1331	55.9355	266.475	30.7026	37.5319		0.0160786	0.000933781
2,4-Dimethylpentane		4.3093	1.31419	0.942968	0.650803	1.13113	0.309037	1.50782	3.68274	0.384681	0.565744		435.219	65.7104	132.712	95.2192	227.343	62.1029	303.059	1476.76	154.245	226.851		25.2584	3.81459	7.70293	5.52708	13.1942	3.60482	17.5883	85.7023	8.95205	13.1656		0.0135022	0.00078358
n-Heptane		78.2103	26.8765	21.0649	26.1176	18.7238	6.62327	30.5187	67.2069	9.75832	6.99871		7897.71	2636.34	2712.98	2126.01	3761.52	1329.32	6132.29	26946.1	3909.26	2802.66		453.851	151.505	155.91	122.179	216.16	76.3936	352.398	1548.47	224.649	161.058		0.0693029	0.00398251
n-Octane		53.4253	27.0548	23.6865	22.3186	18.8577	8.95881	24.7598	40.3353	14.4889	6.19743		5395.02	2253.25	2731.6	2391.41	3787.87	1798.2	4974.2	16169.5	5805.07	2480.18		310.992	129.889	157.463	137.853	218.348	103.657	286.732	932.065	334.626	142.968		0	0
3-Methylheptane		18.9363	8.43163	6.97987	5.25102	4.90394	2.13885	8.04141	4.37003	3.73186	1.91099		1911.2	528.994	850.236	703.608	985.676	429.892	1616.31	1752.36	1496.46	766.296		109.878	30.4138	48.8822	40.4525	56.6683	24.7158	92.9239	100.746	86.0336	44.0558		0	0
2-Methylheptane		28.2067	12.4113	10.1824	8.46171	7.94608	3.26098	12.068	6.20197	5.60622	2.97444		2847.85	853.601	1252.51	1027.39	1595.37	653.666	2423.88	2483.42	2244.52	1189.18		163.694	49.0653	71.9945	59.0547	91.7019	37.573	139.324	142.747	129.015	68.3542		0	0

## Sheet: LPG evaporative
	Diluted mixing ratios (ppb)											Actual sample mixing ratios (ppb)											measurement uncertainty to actual sample mixing ratios (ppb)											Ambient backgrounds (ppb)
	Domestic LPG					Commercial LPG						Domestic LPG					Commercial LPG						Domestic LPG					Commercial LPG						Background 1 for domestic LPG 1		Background 2 for domestic LPG 2		Background 3 for domestic LPG 3		Background 4 for domestic LPG 4-5		Background 5 for commercial LPG 1-5
Compounds	LPG 1	LPG 2	LPG 3	LPG 4	LPG 5	LPG 1	LPG 2	LPG 3	LPG 4	LPG 5		LPG 1	LPG 2	LPG 3	LPG 4	LPG 5	LPG 1	LPG 2	LPG 3	LPG 4	LPG 5		LPG 1	LPG 2	LPG 3	LPG 4	LPG 5	LPG 1	LPG 2	LPG 3	LPG 4	LPG 5		mixing ratio	uncertainty	mixing ratio	uncertainty	mixing ratio	uncertainty	mixing ratio	uncertainty	mixing ratio	uncertainty
Benzene	0.0897803	0.146241	0.0955384	0.0913889	0.0513832	0.114302	0.0870281	0.0877422	0.0714757	0.0650993		23500	46316.2	25818.6	11672.9	7176.41	46187.6	35166.3	35454.9	28880.7	0		1353.04	2666.62	1487	672.21	413.329	2659.29	2024.75	2041.37	1662.92	0		1.23764	0.0712553	1.07233	0.0617377	0.652116	0.0375446	0.249914	0.0143884	0.195049	0.0114834
Toluene	0.312131	0.731349	0.4268	0.304046	0.18583	0.284785	0.188328	0.191554	0.270371	0.421048		88335	257744	134636	42876.3	37966.5	115065	76086.5	77390.3	109250	120696		5139.98	14996.9	7836.16	2495.16	2209.49	6696.04	4428.08	4503.94	6357.14	7023.09		2.36395	0.137546	3.42957	0.19955	1.14496	0.0666194	0.67276	0.0391446	0.830568	0.0483224
Styrene	0.0352614	0.068301	0.0419516	0.03495	0.0162806	0.0282412	0.0197201	0.0194285	0.0233295	0.0219535		9306.68	22658.3	12006.3	4674.29	1802.84	11409.8	7966.4	7848.59	9426.52	99.9274		549.508	1337.79	709.128	276.032	106.497	673.799	470.496	463.541	556.611	5.95534		0.300118	0.0177194	0.471672	0.0278483	0.157645	0.00930757	0.0808466	0.00477331	0.088646	0.00777625
m/p-Xylene	0.0925381	0.200568	0.120364	0.0808854	0.0487007	0.0732415	0.0561175	0.0525519	0.0570568	0.0502291		27753.4	71409.2	38982.4	12570.4	12131.3	29587.8	22668	21227.1	23053.9	0		1646.46	4236.2	2313.52	745.872	719.827	1755.77	1345.27	1259.79	1367.78	0		0.616842	0.0365926	1.04542	0.0620169	0.365855	0.0217034	0.182243	0.0108111	0.252743	0.0209783
Ethylbenzene	0.047554	0.0888033	0.0542131	0.0418254	0.0202208	0.035201	0.0317715	0.0225402	0.0327806	0.0297724		13407.1	30076.7	16090.3	6427.45	4122.74	14221.9	12836.1	9105.66	13245.2	1471.37		779.078	1747.63	935.435	373.556	239.64	826.531	746.005	529.25	769.7	85.5823		0.723526	0.0420406	0.962437	0.0559225	0.287245	0.0166904	0.148726	0.00864175	0.241981	0.018905
o-Xylene	0	0.010934	0.0125438	0.0182059	0.0138868	0.0185575	0.01904	0.014061	0.0193358	0.021473		0	4418.38	5066.7	867.28	0	7498.44	7693.41	5681.4	7812.98	1822.14		0	256.756	294.557	50.4333	0	435.773	447.103	330.185	454.047	105.92		0.0983513	0.00571519	0.0933834	0.0054265	0.081041	0.00470928	0.0485683	0.0028223	0.0469248	0.00405916
m-Ethyltoluene	0.0140845	0.0293516	0.0152619	0.0118664	0.0074674	0.0117889	0	0	0.00853593	0		5691.43	11860.9	6165.49	2397.66	3017.04	4762.47	0	0	3448.83	0		358.772	747.669	388.763	151.173	190.216	300.296	0	0	217.435	0		0.14837	0.00935262	0.132642	0.00836122	0.0759109	0.00478511	0.0381319	0.00240368	0.0426906	0.00444985
1,2,3-Trimethylbenzene	0.00969183	0.0191124	0.0188895	0	0.00937115	0.0101895	0	0	0	0		3916.2	7723.03	7632.4	0	3786.66	4116.62	0	0	0	0		298.678	588.997	582.128	0	288.795	314.015	0	0	0	0		0.166577	0.0127035	0.273196	0.0208344	0.322248	0.0245752	0	0	0	0
o-Ethyltoluene	0	0.0120403	0.00702283	0.00512753	0	0.0047892	0	0	0	0		0	4865.46	2837.23	1036.1	0	1934.8	0	0	0	0		0	307.439	179.323	65.4802	0	122.289	0	0	0	0		0.0565394	0.0035726	0.0595085	0.00376021	0.0260715	0.0016474	0.0173964	0.00109924	0.0133878	0.00146057
1,3,5-Trimethylbenzene	0.00849045	0.0157844	0.012756	0.0128349	0.00676027	0.00793604	0	0	0.0108852	0		3430.94	6378.44	5153.75	2593.65	2731.54	3206.24	0	0	4398.42	0		214.495	398.761	322.256	162.164	170.785	200.488	0	0	274.993	0		0.0624626	0.00390495	0.0602268	0.00376518	0.0453057	0.00283236	0.0351414	0.00219693	0.0199382	0.00223805
p-Ethyltoluene	0.00597186	0.0155084	0.00809503	0.00710403	0.00697024	0.00580061	0	0	0.00588811	0		2413.09	6266.86	3270.09	1435.43	2816.38	2343.18	0	0	2379.09	0		153.642	398.995	208.266	91.4077	179.328	149.236	0	0	151.487	0		0.0913873	0.00581829	0.140544	0.00894791	0.11766	0.00749098	0.0308611	0.00196481	0.0209604	0.00227641
Isopropylbenzene	0	0	0	0	0	0	0	0	0	0		0	0	0	0	0	0	0	0	0	0		0	0	0	0	0	0	0	0	0	0		0.0462395	0.00279001	0.0421889	0.00254561	0.0230757	0.00139235	0	0	0.0114225	0.000959577
1,2,4-Trimethylbenzene	0.0149886	0.00775504	0.0114105	0.014157	0.00973363	0.0162469	0.0148378	0.0134925	0.0139499	0.014802		2869.89	0	1423.61	724.143	0	6564.82	5995.41	5451.76	5637	835.206		272.187	0	135.06	68.6936	0	622.659	568.657	517.097	534.628	79.2268		0.227538	0.0215797	0.07521	0.00713289	0.0947545	0.0089865	0.173754	0.0164788	0.160894	0.0214063
n-Propylbenzene	0	0.0107551	0.00874744	0.00606819	0.00479561	0.00914647	0	0	0	0		0	4346.11	3534.2	1226.18	1937.7	3695.64	0	0	0	0		0	266.22	216.524	75.1212	118.705	226.401	0	0	0	0		0.0492464	0.00301654	0.0534867	0.00327628	0.0423465	0.0025939	0.0179425	0.00109905	0.0165869	0.00164867
p-Diethylbenzene	0	0	0	0	0	0	0	0	0	0		0	0	0	0	0	0	0	0	0	0		0	0	0	0	0	0	0	0	0	0		0.138766	0.00980979	0.0317318	0.00224322	0.0570435	0.00403259	0.0243186	0.00171916	0.0406784	0.00601201
m-Diethylbenzene	0	0	0	0	0	0	0	0	0	0		0	0	0	0	0	0	0	0	0	0		0	0	0	0	0	0	0	0	0	0		0.203396	0.0142102	0.00871728	0.00060903	0.0102368	0.000715189	0	0	0	0
Acetylene	0	0	0	0	0	0	0	0	0	0		0	0	0	0	0	0	0	0	0	0		0	0	0	0	0	0	0	0	0	0		2.88827	0.168409	5.98863	0.349184	3.56677	0.207971	0.913293	0.0532522	0.916805	0.0591399
Ethene	1.08657	1.01127	1.30285	1.43479	0.893836	0.86717	0.833002	0.938077	1.20778	1.05688		0	0	23838	192629	0	350400	336593	379053	488064	0		0	0	1413.01	11407.8	0	20752.2	19934.6	22449.1	28903.5	0		3.48305	0.206267	7.511	0.444804	5.63204	0.333532	2.85076	0.168823	1.4806	0.0886644
Propene	5.87653	14.7597	7.85815	10.8082	1.09509	0.689458	0.712013	0.673481	7.93662	2.26719		2.04516e+06	5.63484e+06	2.84579e+06	3.67522e+06	0	278599	287713	272142	3.20719e+06	556449		117686	324249	163765	211486	0	16032.3	16556.7	15660.7	184554	32020.2		2.16433	0.124543	1.94704	0.11204	3.6421	0.209579	0.942927	0.0542594	0.238704	0.0137589
trans-2-Butene	21.5865	30.7445	19.5104	31.6904	0.760902	80.758	53.8193	57.2507	23.381	47.2798		8.69718e+06	1.23979e+07	7.85581e+06	1.2767e+07	268402	3.26343e+07	2.17483e+07	2.3135e+07	9.44804e+06	1.91056e+07		499632	712230	451437	733450	15432.9	1.87477e+06	1.24939e+06	1.32905e+06	542781	1.09758e+06		0.569449	0.0327135	6.64878	0.381956	13.0956	0.75231	0.104975	0.00603058	0.0550637	0.00320317
1-Butene	14.8795	32.424	19.7344	31.6303	0.454086	44.0227	40.6275	26.4541	21.4612	34.2442		6.00444e+06	1.30942e+07	7.96571e+06	1.27712e+07	172890	1.77896e+07	1.64176e+07	1.06901e+07	8.67243e+06	1.38264e+07		345046	752459	457786	733904	9939.18	1.02228e+06	943439	614308	498366	794538		0.694623	0.0399166	3.93003	0.22584	5.1407	0.295411	0.0709348	0.00407627	0.0643729	0.00375585
cis-2-Butene	11.1852	21.7941	14.2045	14.8932	0.386406	36.7339	30.5409	34.1691	11.8356	25.7497		4.50942e+06	8.79648e+06	5.7282e+06	6.00537e+06	143146	1.48442e+07	1.23415e+07	1.38077e+07	4.78267e+06	1.03894e+07		259177	505575	329302	345162	8233.03	853165	709328	793596	274888	597133		0.410045	0.0235672	4.23218	0.243243	5.40233	0.310497	0.0385535	0.00221585	0.0279123	0.00164204
isoprene	0.0575743	0.104403	0.0750009	0	0	0.0635045	0.114235	0.356214	0.0205467	0.0219983		7299.29	26223.2	14336.8	0	0	25661.3	46161.6	143945	8301.37	1407.1		432.953	1555.27	850.607	0	0	1521.98	2737.82	8537.19	492.433	83.5461		0.590008	0.0349923	0.782411	0.0464033	0.402353	0.0238628	0.335677	0.0199084	0.283248	0.0165078
trans-2-Pentene	0.0584625	0.09461	0.0517357	0.0286649	0.0426005	0.191622	0.129441	0.178958	0.0233451	0.0369287		23624.6	38231.9	20895.2	11581.1	17212.5	77432.9	52305.8	72315.7	9431.38	14920.5		1368.16	2214.1	1210.74	670.826	996.951	4484.4	3029.23	4188.05	546.331	864.22		0.038572	0.00223379	0.181263	0.0104973	0.0629508	0.00364562	0.0342843	0.00198548	0.0132474	0.00076914
cis-2-Pentene	0.016361	0.0367571	0.0174079	0.0300323	0	0.0769686	0.0513703	0.0928229	0	0		6611.41	14853.6	7030.72	12134.9	0	31102.7	20758.4	37509.5	0	0		382.772	859.948	407.264	702.618	0	1800.71	1201.83	2171.63	0	0		0.0192814	0.00111629	0.081347	0.00470958	0.0268337	0.00155354	0.0160934	0.000931725	0.011869	0.000690035
1-Pentene	0.0555673	0.0566237	0.0438782	0.0575464	0.0181458	0.543728	0.503655	0.625154	0.0293598	0.0840045		22454.6	22881.6	17712.6	23252.1	7330.23	219720	203527	252625	11861.8	26668.7		1307.18	1332.03	1032.2	1353.73	426.866	12790.8	11848.1	14706.3	690.666	1552.63		0.0507502	0.00295436	0.195939	0.0114063	0.0953254	0.00554924	0.0207543	0.00120819	0.0175495	0.00102754
1-hexene	0	0	0	0	0	0.0846671	0.141848	0.326933	0	0		0	0	0	0	0	34214	57321	132114	0	0		0	0	0	0	0	2001.82	3353.79	7729.83	0	0		0.0392302	0.00229531	0.532525	0.0311574	0.438117	0.0256337	0	0	0.371875	0.0217988
Ethane	16.5308	4.40962	2.88374	69.3578	6.07396	2.41759	2.85799	2.66039	38.1646	2.76798		6.16488e+06	1.2667e+06	650079	3.36105e+07	3.90468e+06	976942	1.15491e+06	1.07506e+06	1.54223e+07	324688		356528	73256.3	37596.4	1.94377e+06	225816	56499.2	66791.2	62173.4	891906	18777.5		5.20896	0.301245	5.57105	0.322185	6.60924	0.382226	1.03353	0.0597713	0.253651	0.0156481
Propane	147.228	144.033	69.2159	187.86	188.749	3.13533	2.77192	0.780251	124.02	20.4953		5.94382e+07	5.81472e+07	2.79126e+07	9.10971e+07	1.22038e+08	1.26695e+06	1.1201e+06	315261	5.01166e+07	8.14516e+06		3.63043e+06	3.55158e+06	1.70494e+06	5.56414e+06	7.45396e+06	77386.7	68416.9	19258.3	3.06108e+06	497501		7.34545	0.448654	12.0339	0.735022	22.3419	1.36463	0.940182	0.0574255	1.20967	0.0696934
n-Butane	73.5743	46.1161	27.2723	82.3981	46.0631	170.618	146.406	122.905	65.9061	133.514		2.96905e+07	1.85946e+07	1.09751e+07	3.99332e+07	2.97593e+07	6.89467e+07	5.91626e+07	4.96658e+07	2.66324e+07	5.39092e+07		1.70822e+06	1.06983e+06	631717	2.29755e+06	1.7122e+06	3.96682e+06	3.4039e+06	2.85751e+06	1.5323e+06	3.10165e+06		4.86625	0.279977	24.4215	1.40508	19.6078	1.12813	0.624695	0.0359414	0.465972	0.0269343
Isobutane/ 2-Methylpropane	63.0966	64.5897	38.7626	76.6417	24.8335	68.1574	61.5845	26.983	67.6798	88.5575		2.54884e+07	2.60918e+07	1.56537e+07	3.71535e+07	1.60447e+07	2.75423e+07	2.48862e+07	1.09037e+07	2.73494e+07	3.57726e+07		1.46633e+06	1.50105e+06	900625	2.13743e+06	923049	1.5845e+06	1.4317e+06	627294	1.5734e+06	2.05798e+06		3.17569	0.182696	10.3776	0.597015	9.17893	0.528059	0.377186	0.0216993	0.296999	0.0171668
Cyclopentane	0.0735005	0.124789	0.0670974	0	0.0108481	0.053036	0.111324	0.0397562	0.0248932	0.0257641		29701.1	50427.2	27111	0	7012.92	21430.7	44985.1	16064.4	10058.3	10410.2		1718.82	2918.2	1569.08	0	405.895	1240.25	2603.33	929.704	582.13	602.497		0.245328	0.014197	0.530875	0.0307215	0.132641	0.00767589	0.0624921	0.00361639	0.0390404	0.00236123
Isopentane/2-Methylbutane	1.96561	2.20929	1.21209	1.43375	0.261427	10.2116	11.5825	22.8872	1.26348	3.52415		743836	842315	438946	679372	153144	4.12649e+06	4.68049e+06	9.24873e+06	510524	1.38237e+06		42770.5	48432.7	25262.1	39066.2	8808.43	237272	269127	531797	29357.5	79488		3.4675	0.199379	7.29003	0.419172	2.22631	0.128011	1.01242	0.0582133	0.435477	0.0260563
n-Pentane	0.21705	0.50522	0.248094	0.105881	0.0764046	1.10508	0.812119	1.02671	0.136761	0.192015		79066	195517	91553.1	43063.3	41119.6	446557	328171	414889	55256.9	48957		4549.72	11250.5	5271.56	2478.43	2366.59	25696.1	18884	23873.9	3180.08	2817.57		1.00472	0.0578137	1.88339	0.108374	0.694742	0.0399768	0.311048	0.0178983	0.10481	0.00606161
Cyclohexane	0.0216694	0.055224	0.0293183	0.024268	0.0069172	0.0690036	0.12825	0.143978	0.0247774	0.06538		8756.31	22316	11842.6	5883.99	4470.89	27883.9	51825.6	58181.1	10011.1	26418.6		506.54	1290.91	685.339	340.455	258.712	1613.01	2997.95	3365.6	579.191	1528.31		0.18385	0.010635	0.322791	0.0186723	0.0728381	0.00421342	0.0705168	0.00407914	0.0688784	0.0040371
Methylcyclopentane	0.0283784	0.0644882	0.0458833	0.0220306	0.00915643	0.0512358	0.0889517	0.0429039	0.0219866	0.0226568		11467.4	26059.7	18539.8	5342.08	5919.4	20703.9	35944.9	17336.9	8884.01	3575.19		669.777	1522.03	1082.92	312.053	345.771	1209.25	2099.41	1012.6	518.92	208.857		0.141573	0.00826862	0.295944	0.0172847	0.0589823	0.00344488	0.109964	0.00642247	0.115741	0.00675661
2,2-Dimethylbutane	0.0807163	0.175665	0.128166	0.0202446	0.0257669	0.151842	0.098894	0.0726034	0.056433	0.0542969		20497.9	58867.2	39671.2	2850.37	9693.19	61358.1	39961.8	29337.8	22802.8	14425.7		1180.85	3391.14	2285.41	164.302	558.492	3534.69	2302.13	1690.12	1313.69	831.117		0.507154	0.0292153	0.785968	0.0452767	0.338707	0.0195116	0.206733	0.0119091	0.169243	0.00977135
2,3-Dimethylbutane	0.0379453	0.0638494	0.0468759	0.0133739	0.0200288	0.0457493	0.0373959	0.0303387	0.0249672	0.0251978		5552.89	16020.9	9161.27	1925.87	8390.48	18486.5	15110.8	12259	10088.8	4958.48		319.234	921.007	526.699	110.739	482.374	1062.79	868.736	704.791	580.009	285.077		0.042685	0.00245386	0.206566	0.011875	0.0974019	0.0055994	0.0677297	0.00389362	0.0445879	0.00257953
n-Hexane	0.0640398	0.122964	0.0736849	0.0383037	0	0.112553	0.123446	0.0748557	0.0609143	0.0511957		8157.49	31969.2	12050.4	0	0	45481.3	49882.9	30247.6	24614	6485.04		468.941	1837.67	692.983	0	0	2614.45	2867.47	1738.79	1414.95	372.861		0.448256	0.0257667	0.543221	0.0312255	0.207774	0.0119433	0.352401	0.0202568	0.015699	0.000915266
2-Methylpentane	0.122804	0.237928	0.159983	0.0467452	0.0435226	0.160273	0.141964	0.101995	0.0826216	0.0777291		18428.4	64950.7	33448.7	5276.28	10748.6	64763.8	57365.1	41213.8	33386.8	6477.4		1059.01	3732.32	1922.36	303.233	617.694	3721.72	3296.56	2368.44	1918.57	372.254		0.160969	0.00924988	0.718305	0.0412765	0.271028	0.0155743	0.201991	0.0116071	0.155798	0.00906028
3-Methylpentane	0.048119	0.0985345	0.0660312	0.0191742	0.0191651	0.0656837	0.0688285	0.0426312	0.0447526	0.035589		5491.25	25864.4	12727.9	1930.51	5023.99	26541.7	27812.5	17226.1	18082.8	3075.13		328.614	1547.73	761.757	115.629	300.742	1588.32	1664.37	1030.88	1082.18	184.123		0.322403	0.0192926	0.29958	0.0179269	0.113569	0.00679596	0.128266	0.00767542	0.102824	0.00603265
3-Methylhexane	0.0180494	0.0314815	0.0139962	0.0205006	0.00798208	0.0259645	0.0231171	0.0187132	0.0195438	0.018855		3570.29	8998.34	1931.4	1813.23	0	10491.6	9341	7561.38	7897.26	3599.52		206.501	520.429	111.773	104.893	0	606.827	540.28	437.354	456.766	208.204		0.159839	0.00924438	0.193095	0.0111678	0.0709675	0.00410445	0.0372552	0.00215468	0.0378974	0.0022492
2-Methylhexane	0.0101798	0.0366293	0.011016	0.00751092	0.004708	0.0189185	0.0108846	0.00830924	0	0.00790178		0	6793.49	0	1821.18	3043.64	7644.39	4397.89	3357.17	0	0		0	391.507	0	104.974	175.423	440.571	253.479	193.504	0	0		0.0840632	0.00484446	0.186421	0.0107432	0.122235	0.00704424	0.0211933	0.00122135	0.0560008	0.00334041
2,3-Dimethylpentane	0	0.0116724	0.00858804	0.00906912	0.00441193	0.0120142	0.0122992	0.0106817	0	0		0	4716.78	3470.07	2199.32	2852.45	4854.77	4969.96	4316.3	0	0		0	273.935	201.55	127.736	165.667	281.956	288.646	250.684	0	0		0.0390334	0.00226691	0.0734089	0.00426331	0.0334814	0.00194447	0.0140163	0.000814014	0.0127547	0.000760653
2,4-Dimethylpentane	0.0117012	0.0178555	0.00921743	0.0129135	0	0.035973	0.0411913	0.104681	0.0114152	0.0178675		4728.38	7215.41	3718.98	3131.14	0	14536.6	16645.3	42301.5	4612.24	7219.62		274.408	418.736	216.161	181.748	0	843.614	965.99	2454.91	267.701	419.016		0.0206422	0.00119794	0.0766496	0.00444823	0.0201859	0.00117145	0.0120152	0.000697281	0.0212999	0.00125323
n-Heptane	0.0186328	0.0502808	0.0237926	0.0266736	0.00977988	0.0319368	0.0275978	0.0207917	0.0213089	0.0215966		3653.27	16442.4	5736.07	3736.96	861.39	12904.4	11151	8400.7	8610.32	4912.75		209.949	944.87	329.769	214.782	49.5367	741.627	640.869	482.82	494.83	282.349		0.127926	0.00735127	0.223616	0.0128501	0.0891377	0.00512232	0.0475158	0.00273051	0.033474	0.00202385
n-Octane	0.0127575	0	0	0.0129337	0.00471556	0.0186185	0.012301	0.00958851	0.0170622	0.01568		5155.21	0	0	1382.62	0	7522.98	4970.04	3873.93	6894.42	1327.09		297.171	0	0	79.7241	0	433.696	286.536	223.352	397.443	76.5232		0	0	0.126998	0.00732059	0	0	0	0	0	0
3-Methylheptane	0	0.00905896	0.0073266	0	0	0	0	0	0	0		0	3660.71	2957.43	0	0	0	0	0	0	0		0	210.459	170.212	0	0	0	0	0	0	0		0	0	0	0	0	0	0	0	0	0
2-Methylheptane	0	0.0134683	0.0062764	0	0	0	0	0	0	0		0	5442.51	2535.71	0	0	0	0	0	0	0		0	312.835	145.786	0	0	0	0	0	0	0		0	0	0	0	0	0	0	0	0	0
	147.228	144.033	69.2159			170.618	146.406	122.905	124.02	133.514

[truncated: 1 more sheets: Traffic]
